# Supplementary material for: Studying Engagement in Educational Settings: A Bibliometrics on High-Impact Academic Engagement Research
Source: Preprints.org preprint supplement (doi:10.20944/preprints202408.0341.v1), 2024-08-05
Supplement: Supplementary file 1 [file supplementary]

## Sheet: savedrecs
Publication Type	Authors	Book Authors	Book Editors	Book Group Authors	Author Full Names	Book Author Full Names	Group Authors	Article Title	Source Title	Book Series Title	Book Series Subtitle	Language	Document Type	Conference Title	Conference Date	Conference Location	Conference Sponsor	Conference Host	Author Keywords	Keywords Plus	Abstract	Addresses	Affiliations	Reprint Addresses	Email Addresses	Researcher Ids	ORCIDs	Funding Orgs	Funding Name Preferred	Funding Text	Cited References	Cited Reference Count	Times Cited, WoS Core	Times Cited, All Databases	180 Day Usage Count	Since 2013 Usage Count	Publisher	Publisher City	Publisher Address	ISSN	eISSN	ISBN	Journal Abbreviation	Journal ISO Abbreviation	Publication Date	Publication Year	Volume	Issue	Part Number
J	Furrer, C; Skinner, E				Furrer, C; Skinner, E			Sense of relatedness as a factor in children's academic engagement and performance	JOURNAL OF EDUCATIONAL PSYCHOLOGY			English	Article							SOCIAL SUPPORT; MIDDLE SCHOOL; ADOLESCENT ACHIEVEMENT; SELF-DETERMINATION; MULTIPLE WORLDS; MOTIVATION; CLASSROOM; PERCEPTIONS; STUDENT; PEER	Children's sense of relatedness is vital to their academic motivation from 3rd to 6th grade. Children's (n = 641) reports of relatedness predicted changes in classroom engagement over the school year and contributed over and above the effects of perceived control. Regression and cumulative risk analyses revealed that relatedness to parents, teachers, and peers each uniquely contributed to student…	Portland State Univ, Dept Psychol, Portland, OR 97207 USA	Portland State University	Portland State Univ, Dept Psychol, POB 751, Portland, OR 97207 USA.	skinnere@pdx.edu	Fahimifar, Sepideh/M-5303-2019	Furrer, Carrie/0000-0002-4414-7368					84	1310	2172	9	241	AMER PSYCHOLOGICAL ASSOC	WASHINGTON	750 FIRST ST NE, WASHINGTON, DC 20002-4242 USA	0022-0663	1939-2176		J EDUC PSYCHOL	J. Educ. Psychol.	MAR	2003	95	1
J	Skinner, E; Marchand, G; Furrer, C; Kindermann, T				Skinner, Ellen; Marchand, Gwen; Furrer, Carrie; Kindermann, Thomas			Engagement and Disaffection in the Classroom: Part of a Larger Motivational Dynamic?	JOURNAL OF EDUCATIONAL PSYCHOLOGY			English	Article						academic engagement; disaffection; achievement motivation; classroom participation; emotional engagement	PERCEIVED CONTROL; MIDDLE SCHOOL; ACHIEVEMENT; AUTONOMY; STUDENTS; SELF; TEACHERS; BEHAVIOR; MODEL; RELATEDNESS	A study of 805 4th through 7th graders used a model of motivational development to guide the investigation of the internal dynamics of 4 indicators of behavioral and emotional engagement and disaffection and the facilitative effects of teacher support and 3 student self-perceptions (competence, autonomy, and relatedness) on changes in these indicators over the school year. In terms of internal dy…	[Skinner, Ellen; Kindermann, Thomas] Portland State Univ, Dept Psychol, Portland, OR 97221 USA; [Furrer, Carrie] NPC Res, Portland, OR USA; [Marchand, Gwen] Univ Nevada, Dept Educ Psychol, Las Vegas, NV 89154 USA	Portland State University; Nevada System of Higher Education (NSHE); University of Nevada Las Vegas	Skinner, E (corresponding author), Portland State Univ, Dept Psychol, POB 751, Portland, OR 97221 USA.	skinnere@pdx.edu	Kindermann, Thomas A/A-5307-2008	Kindermann, Thomas A/0000-0003-4546-9649; Marchand, Gwen/0000-0003-1337-6296; Furrer, Carrie/0000-0002-4414-7368					81	1066	1476	24	310	AMER PSYCHOLOGICAL ASSOC	WASHINGTON	750 FIRST ST NE, WASHINGTON, DC 20002-4242 USA	0022-0663	1939-2176		J EDUC PSYCHOL	J. Educ. Psychol.	NOV	2008	100	4
J	Aronson, J; Fried, CB; Good, C				Aronson, J; Fried, CB; Good, C			Reducing the effects of stereotype threat on African American college students by shaping theories of intelligence	JOURNAL OF EXPERIMENTAL SOCIAL PSYCHOLOGY			English	Article							ACHIEVEMENT; CONCEPTIONS; MOTIVATION; PREJUDICE; MEDIA	African American college students tend to obtain lower grades than their White counterparts, even when they enter college with equivalent test scores. Past research suggests that negative stereotypes impugning Black students' intellectual abilities play a role in this underperformance. Awareness of these stereotypes can psychologically threaten African Americans, a phenomenon known as stereotype …	NYU, Dept Appl Psychol, New York, NY 10003 USA; Winona State Univ, Winona, MN 55987 USA; Univ Texas, Austin, TX 78712 USA	New York University; Minnesota State Colleges & Universities; Winona State University; University of Texas System; University of Texas Austin	NYU, Dept Appl Psychol, New York, NY 10003 USA.	joshua.aronson@nyu.edu		Good, Catherine/0009-0007-3384-273X					65	939	1662	8	202	ACADEMIC PRESS INC ELSEVIER SCIENCE	SAN DIEGO	525 B ST, STE 1900, SAN DIEGO, CA 92101-4495 USA	0022-1031	1096-0465		J EXP SOC PSYCHOL	J. Exp. Soc. Psychol.	MAR	2002	38	2
J	Skinner, EA; Kindermann, TA; Furrer, CJ				Skinner, Ellen A.; Kindermann, Thomas A.; Furrer, Carrie J.			A Motivational Perspective on Engagement and Disaffection Conceptualization and Assessment of Children's Behavioral and Emotional Participation in Academic Activities in the Classroom	EDUCATIONAL AND PSYCHOLOGICAL MEASUREMENT			English	Article						academic engagement; disaffection; achievement motivation; classroom participation; emotional engagement; on-task behavior	ACHIEVEMENT-MOTIVATION; STUDENT ENGAGEMENT; SCHOOL ENGAGEMENT; PERCEIVED CONTROL; MIDDLE; SELF; TEACHERS; ELEMENTARY; MODEL; ATTACHMENT	This article presents a motivational conceptualization of engagement and disaffection: First, it emphasizes children's constructive, focused, enthusiastic participation in the activities of classroom learning; second, it distinguishes engagement from disaffection, as well as behavioral features from emotional features. Psychometric properties of scores from teacher and student reports of behavior…	[Skinner, Ellen A.] Portland State Univ, Dept Psychol, Portland, OR 97207 USA	Portland State University	Skinner, EA (corresponding author), Portland State Univ, Dept Psychol, POB 751, Portland, OR 97207 USA.	skinnere@pdx.edu	Kindermann, Thomas A/A-5307-2008	Kindermann, Thomas A/0000-0003-4546-9649					70	857	1165	26	249	SAGE PUBLICATIONS INC	THOUSAND OAKS	2455 TELLER RD, THOUSAND OAKS, CA 91320 USA	0013-1644	1552-3888		EDUC PSYCHOL MEAS	Educ. Psychol. Meas.	JUN	2009	69	3
J	Jang, H; Reeve, J; Deci, EL				Jang, Hyungshim; Reeve, Johnmarshall; Deci, Edward L.			Engaging Students in Learning Activities: It Is Not Autonomy Support or Structure but Autonomy Support and Structure	JOURNAL OF EDUCATIONAL PSYCHOLOGY			English	Article						autonomy support; structure; engagement; self-determination theory; teacher behavior	SELF-DETERMINATION THEORY; INTRINSIC MOTIVATION; ACADEMIC ENGAGEMENT; TEACHER-BEHAVIOR; MEDIATING ROLE; CLASSROOM; SCHOOL; PERCEPTIONS; ACHIEVEMENT; ORIENTATIONS	We investigated 2 engagement-fostering aspects of teachers' instructional styles-autonomy support and structure and hypothesized that students' engagement would be highest when teachers provided high levels of both. Trained observers rated teachers' instructional styles and students' behavioral engagement in 133 public high school classrooms in the Midwest, and 1,584 students in Grades 9-11 repor…	[Jang, Hyungshim] Univ Wisconsin, Dept Educ Psychol, Milwaukee, WI 53201 USA; [Reeve, Johnmarshall] Korea Univ, Dept Educ, World Class Univ Project Grp, Seoul, South Korea; [Deci, Edward L.] Univ Rochester, Dept Psychol, Rochester, NY 14627 USA	University of Wisconsin System; University of Wisconsin Milwaukee; Korea University; University of Rochester	Jang, H (corresponding author), Inha Univ, Dept Educ, 325 West Bldg, Inchon 402751, South Korea.	hjang@inha.ac.kr	Deci, Edward L./Y-4790-2019; Reeve, Johnmarshall/M-2650-2019	Deci, Edward L./0000-0001-8246-8536; Reeve, Johnmarshall/0000-0002-6827-293X					71	842	1120	12	309	AMER PSYCHOLOGICAL ASSOC	WASHINGTON	750 FIRST ST NE, WASHINGTON, DC 20002-4242 USA	0022-0663	1939-2176		J EDUC PSYCHOL	J. Educ. Psychol.	AUG	2010	102	3
J	Kuh, GD; Cruce, TM; Shoup, R; Kinzie, J; Gonyea, RM				Kuh, George D.; Cruce, Ty M.; Shoup, Rick; Kinzie, Jillian; Gonyea, Robert M.			Unmasking the effects of student engagement on first-year college grades and persistence	JOURNAL OF HIGHER EDUCATION			English	Article							INVOLVEMENT; PERCEPTIONS; MODEL	This study examines the relationships between student engagement, college GPA, and persistence for 6,000 students attending 18 baccalaureate-granting institutions. Data sources included student-level information from the National Survey of Student Engagement, academic transcripts, merit aid, and ACT/SAT score reports. Engagement had positive, statistically significant effects on grades and persis…	[Kuh, George D.] Indiana Univ, Ctr Postsecondary Res, Bloomington, IN 47405 USA; [Cruce, Ty M.] Indiana Univ, Off Univ Planning Inst Res & Accountabil, Bloomington, IN 47405 USA; [Shoup, Rick; Kinzie, Jillian; Gonyea, Robert M.] Indiana Univ Bloomington, Ctr Postsecondary Res, Bloomington, IN USA; [Kinzie, Jillian] Indiana Univ Bloomington, NSSE Inst, Bloomington, IN USA	Indiana University System; Indiana University Bloomington; Indiana University System; Indiana University Bloomington; Indiana University System; Indiana University Bloomington; Indiana University System; Indiana University Bloomington	Kuh, GD (corresponding author), Indiana Univ, Ctr Postsecondary Res, Bloomington, IN 47405 USA.		Kinzie, Jillian/AAW-7413-2020; GAMBOA, THOMAS/A-4646-2011; Soto, Lupita LS/N-1097-2017	Kinzie, Jillian/0000-0003-2595-9069					53	781	2037	13	190	ROUTLEDGE JOURNALS, TAYLOR & FRANCIS LTD	ABINGDON	2-4 PARK SQUARE, MILTON PARK, ABINGDON OX14 4RN, OXON, ENGLAND	0022-1546	1538-4640		J HIGH EDUC-UK	J. High. Educ.	SEP-OCT	2008	79	5
J	Wang, MT; Eccles, JS				Wang, Ming-Te; Eccles, Jacquelynne S.			Social Support Matters: Longitudinal Effects of Social Support on Three Dimensions of School Engagement From Middle to High School	CHILD DEVELOPMENT			English	Article							STAGE-ENVIRONMENT FIT; STUDENT ENGAGEMENT; OPPOSITIONAL CULTURE; COGNITIVE ENGAGEMENT; ACADEMIC ENGAGEMENT; GENDER-DIFFERENCES; EARLY ADOLESCENCE; ACHIEVEMENT; TRAJECTORIES; MOTIVATION	This study examined the relative influence of adolescents supportive relationships with teachers, peers, and parents on trajectories of different dimensions of school engagement from middle to high school and how these associations differed by gender and race or ethnicity. The sample consisted of 1,479 students (52% females, 56% African American). The average growth trajectories of school complia…	[Wang, Ming-Te; Eccles, Jacquelynne S.] Univ Michigan, Ann Arbor, MI 48109 USA; [Wang, Ming-Te] Univ Pittsburgh, Pittsburgh, PA 15260 USA	University of Michigan System; University of Michigan; Pennsylvania Commonwealth System of Higher Education (PCSHE); University of Pittsburgh	Wang, MT (corresponding author), ISR 5110,426 Thompson St, Ann Arbor, MI 48106 USA.	wangmi@umich.edu	Wang, Ming-Te/HCH-2285-2022						79	605	844	19	318	WILEY	HOBOKEN	111 RIVER ST, HOBOKEN 07030-5774, NJ USA	0009-3920	1467-8624		CHILD DEV	Child Dev.	MAY-JUN	2012	83	3
J	Wang, MT; Eccles, JS				Wang, Ming-Te; Eccles, Jacquelynne S.			School context, achievement motivation, and academic engagement: A longitudinal study of school engagement using a multidimensional perspective	LEARNING AND INSTRUCTION			English	Article						Adolescence; School environment perceptions; School engagement; Achievement motivation; Multidimensional perspective	CLASSROOM SOCIAL-ENVIRONMENT; ADOLESCENTS PERCEPTIONS; OPPOSITIONAL CULTURE; STUDENTS ENGAGEMENT; MIDDLE SCHOOL; PERFORMANCE; ADJUSTMENT; AUTONOMY; GOAL; TEACHERS	This longitudinal study adopts a multidimensional perspective to examine the relationships between middle school students' perceptions of the school environment (structure support, provision of choice, teaching for relevance, teacher and peer emotional support), achievement motivation (academic self-concept and subjective task value), and school engagement (behavioral, emotional, and cognitive en…	[Wang, Ming-Te] Univ Pittsburgh, Pittsburgh, PA 15260 USA; [Eccles, Jacquelynne S.] Univ Michigan, Ann Arbor, MI 48109 USA	Pennsylvania Commonwealth System of Higher Education (PCSHE); University of Pittsburgh; University of Michigan System; University of Michigan	Wang, MT (corresponding author), Univ Pittsburgh, 5940 Wesley W Posvar Hall, Pittsburgh, PA 15260 USA.	mtwang@pitt.edu	Wang, Ming-Te/HCH-2285-2022						79	502	763	46	665	PERGAMON-ELSEVIER SCIENCE LTD	OXFORD	THE BOULEVARD, LANGFORD LANE, KIDLINGTON, OXFORD OX5 1GB, ENGLAND	0959-4752	1873-3263		LEARN INSTR	Learn Instr.	DEC	2013	28
J	Wang, MT; Degol, J				Wang, Ming-Te; Degol, Jessica			Motivational pathways to STEM career choices: Using expectancy-value perspective to understand individual and gender differences in STEM fields	DEVELOPMENTAL REVIEW			English	Article						Career choices; STEM; Individual and gender differences; Expectancy-value theory	CONGENITAL ADRENAL-HYPERPLASIA; CLASSROOM SOCIAL-ENVIRONMENT; SINGLE-SEX SCHOOLS; STEREOTYPE THREAT; MIDDLE SCHOOL; DIGIT RATIO; ADOLESCENTS PERCEPTIONS; TEACHER EXPECTATIONS; ACADEMIC ENGAGEMENT; ACHIEVEMENT GOALS	The United States has made a significant effort and investment in STEM education, yet the size and the composition of the STEM workforce continues to fail to meet demand. It is thus important to understand the barriers and factors that influence individual educational and career choices. In this article, we conduct a literature review of the current knowledge surrounding individual and gender dif…	[Wang, Ming-Te; Degol, Jessica] Univ Pittsburgh, Sch Educ, Dept Appl Dev Psychol, Pittsburgh, PA 15260 USA	Pennsylvania Commonwealth System of Higher Education (PCSHE); University of Pittsburgh	Wang, MT (corresponding author), 230 South Bouquet St, Pittsburgh, PA 15260 USA.	mtwang@pitt.edu	Wang, Ming-Te/HCH-2285-2022		Direct For Education and Human Resources [1108778] Funding Source: National Science Foundation; Division Of Research On Learning [1108778] Funding Source: National Science Foundation	Direct For Education and Human Resources(National Science Foundation (NSF)NSF - Directorate for STEM Education (EDU)); Division Of Research On Learning(National Science Foundation (NSF)NSF - Directorate for STEM Education (EDU))			363	429	637	32	410	ACADEMIC PRESS INC ELSEVIER SCIENCE	SAN DIEGO	525 B ST, STE 1900, SAN DIEGO, CA 92101-4495 USA	0273-2297	1090-2406		DEV REV	Dev. Rev.	DEC	2013	33	4
J	Hughes, JN; Luo, W; Kwok, OM; Loyd, LK				Hughes, Jan N.; Luo, Wen; Kwok, Oi-Man; Loyd, Linda K.			Teacher-student support, effortful engagement, and achievement: A 3-year longitudinal study	JOURNAL OF EDUCATIONAL PSYCHOLOGY			English	Article						student-teacher relationship; academic engagement; reading; math; elementary grades	CHILD RELATIONSHIPS; 1ST-GRADE CLASSROOM; SCHOOL ADJUSTMENT; BEHAVIOR; KINDERGARTEN; PREDICTORS; RISK; ASSOCIATIONS; TEMPERAMENT; RELATEDNESS	Measures of teacher-student relationship quality (TSRQ), effortful engagement, and achievement in reading and math were collected once each year for 3 consecutive years, beginning when participants were in 1st grade, for a sample of 671 (53.1% male) academically at-risk children attending 1 of 3 school districts in Texas. In separate latent variable structural equation models, the authors tested …	[Hughes, Jan N.; Luo, Wen; Kwok, Oi-Man; Loyd, Linda K.] Texas A&M Univ, Dept Educ Psychol, College Stn, TX 77843 USA	Texas A&M University System; Texas A&M University College Station	Hughes, JN (corresponding author), Texas A&M Univ, Dept Educ Psychol, 701 Harrington Bldg,4225 TAMU, College Stn, TX 77843 USA.	jhughes@tamu.edu	Kwok, Oi-Man/HHS-7712-2022	Kwok, Oiman/0000-0002-4617-4562					94	413	649	8	133	AMER PSYCHOLOGICAL ASSOC	WASHINGTON	750 FIRST ST NE, WASHINGTON, DC 20002-4242 USA	0022-0663	1939-2176		J EDUC PSYCHOL	J. Educ. Psychol.	FEB	2008	100	1
J	Wang, MT; Fredricks, JA				Wang, Ming-Te; Fredricks, Jennifer A.			The Reciprocal Links Between School Engagement, Youth Problem Behaviors, and School Dropout During Adolescence	CHILD DEVELOPMENT			English	Article							STUDENT ENGAGEMENT; ANTISOCIAL-BEHAVIOR; ACADEMIC ENGAGEMENT; SUBSTANCE USE; TRAJECTORIES; DELINQUENCY; FAMILY; ACHIEVEMENT; MIDDLE; PERCEPTIONS	Drawing on the self-system model, this study conceptualized school engagement as a multidimensional construct, including behavioral, emotional, and cognitive engagement, and examined whether changes in the three types of school engagement related to changes in problem behaviors from 7th through 11th grades (approximately ages 12-17). In addition, a transactional model of reciprocal relations betw…	[Wang, Ming-Te] Univ Pittsburgh, Pittsburgh, PA 15260 USA; [Fredricks, Jennifer A.] Connecticut Coll, New London, CT 06320 USA	Pennsylvania Commonwealth System of Higher Education (PCSHE); University of Pittsburgh; Connecticut College	Wang, MT (corresponding author), Univ Pittsburgh, 230 South Bouquet St, Pittsburgh, PA 15260 USA.	mtwang@pitt.edu	Wang, Ming-Te/HCH-2285-2022		NIDA NIH HHS [R03 DA034151, DA034151-02] Funding Source: Medline	NIDA NIH HHS(United States Department of Health & Human ServicesNational Institutes of Health (NIH) - USANIH National Institute on Drug Abuse (NIDA))			73	411	603	25	213	WILEY	HOBOKEN	111 RIVER ST, HOBOKEN 07030-5774, NJ USA	0009-3920	1467-8624		CHILD DEV	Child Dev.	MAR	2014	85	2
J	Singh, K; Granville, M; Dika, S				Singh, K; Granville, M; Dika, S			Mathematics and science achievement: Effects of motivation, interest, and academic engagement	JOURNAL OF EDUCATIONAL RESEARCH			English	Article						mathematics and science achievement, motivation; interest; academic engagement effects; National Education Longitudinal Study (1988)	STRUCTURAL MODEL; SCHOOL; PERFORMANCE; MATH; EXPERIENCE; ANXIETY	The purpose of the present study was to examine the effects of 3 school-related constructs-motivation, attitude, and academic engagement-on 8th-grade students' achievement in mathematics and science. Although cognitive abilities of the students and their home backgrounds are important predictors of achievement, in recent years affective variables have emerged as salient factors affecting success …	Virginia Polytech Inst & State Univ, Blacksburg, VA 24061 USA	Virginia Polytechnic Institute & State University	Singh, K (corresponding author), Virginia Tech, 315 E Eggleston Hall, Blacksburg, VA 24060 USA.								32	405	673	9	170	HELDREF PUBLICATIONS	WASHINGTON	1319 EIGHTEENTH ST NW, WASHINGTON, DC 20036-1802 USA	0022-0671			J EDUC RES	J. Educ. Res.	JUL-AUG	2002	95	6
J	Wang, YL; Derakhshan, A; Zhang, LJ				Wang, Yongliang; Derakhshan, Ali; Zhang, Lawrence Jun			Researching and Practicing Positive Psychology in Second/Foreign Language Learning and Teaching: The Past, Current Status and Future Directions	FRONTIERS IN PSYCHOLOGY			English	Article						broaden-and-build theory; positive emotions; positive institutions; positive individual features; positive psychology; second; foreign language education	EMOTIONAL INTELLIGENCE; EFL TEACHERS; ENJOYMENT; ACHIEVEMENT; ANXIETY; GRIT; ENGAGEMENT; MOTIVATION; CONTEXT; PREDICT	In addressing the recent special issue in Frontiers in Psychology, namely Positive Psychology in Foreign and Second Language Education: Approaches and Applications, calling language education researchers around the globe to study positive emotions, positive personality traits, and positive institutional tendencies and their implications for language education systems, stakeholders, and policy pra…	[Wang, Yongliang] Henan Univ, Sch Coll English Teaching & Res, Ctr Second Language Writing Res, Kaifeng, Peoples R China; [Derakhshan, Ali] Golestan Univ, Fac Humanities & Social Sci, Dept English Language & Literature, Gorgan, Golestan, Iran; [Zhang, Lawrence Jun] Univ Auckland, Fac Educ & Social Work, Auckland, New Zealand	Henan University; Golestan University; University of Auckland	Derakhshan, A (corresponding author), Golestan Univ, Fac Humanities & Social Sci, Dept English Language & Literature, Gorgan, Golestan, Iran.	a.derakhshan@gu.ac.ir	Zhang, Lawrence Jun/H-1756-2018; Derakhshan, Ali/AAJ-4592-2020	Zhang, Lawrence Jun/0000-0003-1025-1746; Derakhshan, Ali/0000-0002-6639-9339; Wang, Yongliang/0000-0002-4672-8481	School of Teachers' Education of Henan University [YB-JFZX-22]	School of Teachers' Education of Henan University	This paper was supported by School of Teachers' Education of Henan University, entitled A Study on Chinese EFL Teachers' Emotion Regulation, Resilience and Their Work Engagement Based on Positive Psychology (Grant No. YB-JFZX-22), 2021-2022.		109	383	389	165	1101	FRONTIERS MEDIA SA	LAUSANNE	AVENUE DU TRIBUNAL FEDERAL 34, LAUSANNE, CH-1015, SWITZERLAND	1664-1078			FRONT PSYCHOL	Front. Psychol.	AUG 19	2021	12
J	Johnson, MK; Crosnoe, R; Elder, GH				Johnson, MK; Crosnoe, R; Elder, GH			Students' attachment and academic engagement: The role of race and ethnicity	SOCIOLOGY OF EDUCATION			English	Article							HIGH-SCHOOL ACHIEVEMENT; MATHEMATICS ACHIEVEMENT; SOCIAL DISTRIBUTION; BLACK-ACHIEVEMENT; SECONDARY-SCHOOLS; MIDDLE SCHOOL; DESEGREGATION; ORGANIZATION; PERFORMANCE; BEHAVIOR	Students' attachment to school and their academic engagement are important, yet understudied, aspects of the educational experience. In their study, the authors examined whether students of different racial-ethnic groups vary in attachment and engagement and whether properties of schools (e.g., racial-ethnic composition) influence these outcomes over and above individual characteristics. Using mu…	Univ Texas, Dept Sociol, Austin, TX 78712 USA; Univ N Carolina, Dept Sociol, Chapel Hill, NC USA	University of Texas System; University of Texas Austin; University of North Carolina; University of North Carolina Chapel Hill		monica_johnson@unc.edu	Johnson, Monica Kirkpatrick/JVO-6522-2024						73	359	635	1	65	SAGE PUBLICATIONS INC	THOUSAND OAKS	2455 TELLER RD, THOUSAND OAKS, CA 91320 USA	0038-0407	1939-8573		SOCIOL EDUC	Sociol. Educ.	OCT	2001	74	4
J	Farmer, TW; Lines, MM; Hamm, JV				Farmer, Thomas W.; Lines, Meghan McAuliffe; Hamm, Jill V.			Revealing the invisible hand: The role of teachers in children's peer experiences	JOURNAL OF APPLIED DEVELOPMENTAL PSYCHOLOGY			English	Article						Social dynamics; Classroom management; School context; Teacher-student relationships	LATE ELEMENTARY-SCHOOL; AFRICAN-AMERICAN; SOCIAL-STATUS; PERCEIVED POPULARITY; AGGRESSIVE-BEHAVIOR; ACADEMIC ENGAGEMENT; MIDDLE SCHOOL; CLASSROOM; ADOLESCENTS; ADJUSTMENT	To introduce this special issue, the concept of the teacher as an invisible hand is presented as a metaphor to describe the potentially influential but relatively understudied contribution that educators are likely to have on children's peer relationships and their broader interpersonal growth. Building from conceptual work distinguishing between the role of adults and peers in children's social …	[Farmer, Thomas W.] Penn State Univ, University Pk, PA 16802 USA; [Lines, Meghan McAuliffe] Nemours AI DuPont Hosp Children, Wilmington, DE USA; [Hamm, Jill V.] Univ N Carolina, Chapel Hill, NC USA	Pennsylvania Commonwealth System of Higher Education (PCSHE); Pennsylvania State University; Pennsylvania State University - University Park; Nemours Alfred I. duPont Hospital for Children; University of North Carolina; University of North Carolina Chapel Hill	Farmer, TW (corresponding author), Penn State Univ, University Pk, PA 16802 USA.	twf2@psu.edu	Farmer, Tom/AFR-4877-2022						118	347	412	5	118	ELSEVIER SCIENCE INC	NEW YORK	STE 800, 230 PARK AVE, NEW YORK, NY 10169 USA	0193-3973	1873-7900		J APPL DEV PSYCHOL	J. Appl. Dev. Psychol.	SEP-OCT	2011	32	5
J	Giacomelli, E; Meraviglia, V; Campostrini, G; Cochrane, A; Cao, X; van Helden, RWJ; Garcia, AK; Mircea, M; Kostidis, S; Davis, RP; van Meer, BJ; Jost, CR; Koster, AJ; Mei, HL; Míguez, DG; Mulder, AA; Ledesma-Terrón, M; Pompilio, G; Sala, L; Salvatori, DCF; Slieker, RC; Sommariva, E; de Vries, AAF; Giera, M; Semrau, S; Tertoolen, LGJ; Orlova, VV; Bellin, M; Mummery, CL				Giacomelli, Elisa; Meraviglia, Viviana; Campostrini, Giulia; Cochrane, Amy; Cao, Xu; van Helden, Ruben W. J.; Garcia, Ana Krotenberg; Mircea, Maria; Kostidis, Sarantos; Davis, Richard P.; van Meer, Berend J.; Jost, Carolina R.; Koster, Abraham J.; Mei, Hailiang; Miguez, David G.; Mulder, Aat A.; Ledesma-Terron, Mario; Pompilio, Giulio; Sala, Luca; Salvatori, Daniela C. F.; Slieker, Roderick C.; S…			Human-iPSC-Derived Cardiac Stromal Cells Enhance Maturation in 3D Cardiac Microtissues and Reveal Non-cardiomyocyte Contributions to Heart Disease	CELL STEM CELL			English	Article							PLURIPOTENT STEM-CELL; DIFFERENTIAL EXPRESSION ANALYSIS; RIGHT-VENTRICULAR CARDIOMYOPATHY; GENE-EXPRESSION; PLAKOPHILIN-2; CONNEXIN43; MODELS; FIBROBLASTS; MECHANISMS; PACKAGE	Cardiomyocytes (CMs) from human induced pluripotent stem cells (hiPSCs) are functionally immature, but this is improved by incorporation into engineered tissues or forced contraction. Here, we showed that tricellular combinations of hiPSC-derived CMs, cardiac fibroblasts (CFs), and cardiac endothelial cells also enhance maturation in easily constructed, scaffold-free, three-dimensional microtissu…	[Giacomelli, Elisa; Meraviglia, Viviana; Campostrini, Giulia; Cochrane, Amy; Cao, Xu; van Helden, Ruben W. J.; Garcia, Ana Krotenberg; Davis, Richard P.; van Meer, Berend J.; Sala, Luca; Tertoolen, Leon G. J.; Orlova, Valeria V.; Bellin, Milena; Mummery, Christine L.] Leiden Univ, Dept Anat & Embryol, Med Ctr, NL-2333 Leiden, Netherlands; [Mircea, Maria; Semrau, Stefan] Leiden Univ, Leiden Inst P…	Leiden University - Excl LUMC; Leiden University; Leiden University Medical Center (LUMC); Leiden University; Leiden University - Excl LUMC; Leiden University - Excl LUMC; Leiden University; Leiden University Medical Center (LUMC); Leiden University; Leiden University Medical Center (LUMC); Leiden University - Excl LUMC; Leiden University - Excl LUMC; Leiden University; Leiden University Medical …	Orlova, VV; Bellin, M; Mummery, CL (corresponding author), Leiden Univ, Dept Anat & Embryol, Med Ctr, NL-2333 Leiden, Netherlands.;Bellin, M (corresponding author), Univ Padua, Dept Biol, I-35121 Padua, Italy.;Bellin, M (corresponding author), Veneto Inst Mol Med, I-35129 Padua, Italy.;Mummery, CL (corresponding author), Univ Twente, Dept Appl Stem Cell Technol, NL-7500 Enschede, Netherlands.	v.orlova@lumc.nl; m.bellin@lumc.nl; c.l.mummery@lumc.nl	Gómez, David G Míguez/K-4519-2014; Semrau, Stefan/B-9772-2009; Davis, Richard P/F-8910-2013; Sala, Luca/J-9532-2018; Orlova, Valeria V/C-6065-2014; Giera, Martin/Y-2413-2018; Sommariva, Elena/K-4078-2016; Campostrini, Giulia/HGU-5867-2022; de Vries, Antoine/ABG-5787-2021; Pompilio, Giulio/J-6701-2014; Kostidis, Sarantos/Y-2422-2018; Koster, Abraham J/I-7665-2017; Meraviglia, Viviana/J-4823-2016; …	Semrau, Stefan/0000-0002-4245-2246; Davis, Richard P/0000-0002-7917-9423; Sala, Luca/0000-0002-4129-6632; Orlova, Valeria V/0000-0002-1169-2802; Giera, Martin/0000-0003-1684-1894; Campostrini, Giulia/0000-0003-4688-4991; Pompilio, Giulio/0000-0003-2581-5735; Koster, Abraham J/0000-0003-1717-2549; Cao, Xu/0000-0002-8368-6727; Salvatori, Daniela/0009-0005-3006-8502; van Helden, Ruben/0000-0001-8288…	European Research Council [ERCAdG 323182 STEMCARDIOVASC]; European Community's Seventh Framework Programme (FP7/2007-2013) [602423]; European Union's Horizon 2020 Research and Innovation Programme [668724]; Netherlands Organ-on-Chip Initiative, an NWO Gravitation - Ministry of Education, Culture and Science of the government of the Netherlands [024.003.001]; Transnational Research Project on Card…	European Research Council(European Research Council (ERC)); European Community's Seventh Framework Programme (FP7/2007-2013)(European Union (EU)); European Union's Horizon 2020 Research and Innovation Programme; Netherlands Organ-on-Chip Initiative, an NWO Gravitation - Ministry of Education, Culture and Science of the government of the Netherlands; Transnational Research Project on Cardiovascula…	This project was funded by the following grants: European Research Council (ERCAdG 323182 STEMCARDIOVASC); European Community's Seventh Framework Programme (FP7/2007-2013) under grant agreement no. 602423; European Union's Horizon 2020 Research and Innovation Programme under grant agreement no. 668724; Netherlands Organ-on-Chip Initiative, an NWO Gravitation project funded by the Ministry of Educ…		92	315	352	8	89	CELL PRESS	CAMBRIDGE	50 HAMPSHIRE ST, FLOOR 5, CAMBRIDGE, MA 02139 USA	1934-5909	1875-9777		CELL STEM CELL	Cell Stem Cell	JUN 4	2020	26	6
J	Abreu, M; Grinevich, V				Abreu, Maria; Grinevich, Vadim			The nature of academic entrepreneurship in the UK: Widening the focus on entrepreneurial activities	RESEARCH POLICY			English	Article						Academic entrepreneurship; University-business links; Technology transfer; Third stream funding	TECHNOLOGY-TRANSFER; UNIVERSITY INVENTIONS; GENDER-DIFFERENCES; LIFE SCIENCES; INDUSTRY; PRODUCTIVITY; SCIENTISTS; EXPERIENCE; DETERMINANTS; RESEARCHERS	We argue that the current focus of the academic entrepreneurship literature, which is mostly on patent-based activities such as spinouts and licensing, should be widened to also include other informal commercial and non-commercial activities that are entrepreneurial in nature. We define as entrepreneurial any activity that occurs beyond the traditional academic roles of teaching and/or research, …	[Abreu, Maria] Univ Cambridge, Pembroke Coll, Dept Land Econ, Cambridge CB2 1RF, England; [Grinevich, Vadim] Sch Business Leadership & Enterprise, Ipswich IP4 1QJ, Suffolk, England	University of Cambridge	Abreu, M (corresponding author), Univ Cambridge, Pembroke Coll, Dept Land Econ, Cambridge CB2 1RF, England.	ma405@cam.ac.uk; v.grinevich@ucs.ac.uk							81	303	326	17	259	ELSEVIER	AMSTERDAM	RADARWEG 29, 1043 NX AMSTERDAM, NETHERLANDS	0048-7333	1873-7625		RES POLICY	Res. Policy	MAR	2013	42	2
J	Rumberger, RW; Larson, KA				Rumberger, RW; Larson, KA			Student mobility and the increased risk of high school dropout	AMERICAN JOURNAL OF EDUCATION			English	Article							RESIDENTIAL-MOBILITY	A variety of evidence suggests that students in the United States change schools frequently. But there has been relatively little research that examines the educational consequences of student mobility. This study examined the incidence of student mobility between the eighth and twelfth grades and its effect on high school completion using the National Educational Longitudinal Survey third follow…	Univ Calif Santa Barbara, Santa Barbara, CA 93106 USA	University of California System; University of California Santa Barbara	Rumberger, RW (corresponding author), Univ Calif Santa Barbara, Santa Barbara, CA 93106 USA.								40	293	631	1	47	UNIV CHICAGO PRESS	CHICAGO	5720 SOUTH WOODLAWN AVE, CHICAGO, IL 60637-1603 USA	0195-6744			AM J EDUC	Am. J. Educ.	NOV	1998	107	1
J	Assor, A; Kaplan, H; Kanat-Maymon, Y; Roth, G				Assor, A; Kaplan, H; Kanat-Maymon, Y; Roth, G			Directly controlling teacher behaviors as predictors of poor motivation and engagement in girls and boys: The role of anger and anxiety	LEARNING AND INSTRUCTION			English	Article						autonomy support; control; emotion; motivation; gender differences; teachers' behavior; engagement	SELF-DETERMINATION THEORY; INTRINSIC MOTIVATION; AUTONOMY	We focused on potential effects of directly controlling teacher behaviors (DCTB), such as giving frequent directives, interfering with children's preferred pace of learning, and not allowing critical and independent opinions. We hypothesized that children's perceptions of their teachers as directly controlling would arouse anger and anxiety in children, and these emotions would enhance a-motivati…	Ben Gurion Univ Negev, Dept Educ, IL-84105 Beer Sheva, Israel	Ben Gurion University	Ben Gurion Univ Negev, Dept Educ, IL-84105 Beer Sheva, Israel.	assor@bgumail.bgu.ac.il	Roth, Guy/F-1496-2012	Roth, Guy/0000-0002-5662-7561; Kaplan, Haya/0000-0001-5376-6892					31	285	366	2	80	PERGAMON-ELSEVIER SCIENCE LTD	OXFORD	THE BOULEVARD, LANGFORD LANE, KIDLINGTON, OXFORD OX5 1GB, ENGLAND	0959-4752	1873-3263		LEARN INSTR	Learn Instr.	OCT	2005	15	5
J	Horner, RH; Sugai, G; Anderson, CM				Horner, Robert H.; Sugai, George; Anderson, Cynthia M.			Examining the Evidence Base for School-Wide Positive Behavior Support	FOCUS ON EXCEPTIONAL CHILDREN			English	Article							PREVENTING ANTISOCIAL-BEHAVIOR; INCREASE ACADEMIC ENGAGEMENT; 1ST STEP; EARLY INTERVENTION; TARGETED INTERVENTION; ELEMENTARY; IMPLEMENTATION; DISCIPLINE; STUDENTS; SUCCESS		[Horner, Robert H.] Univ Oregon, Dept Special Educ, Eugene, OR 97403 USA; [Sugai, George] Univ Connecticut, Dept Special Educ, Storrs, CT 06269 USA	University of Oregon; University of Connecticut	Horner, RH (corresponding author), Univ Oregon, Dept Special Educ, Eugene, OR 97403 USA.								112	285	382	1	39	LOVE PUBLISHING COMPANY	DENVER	9101 EAST KENYON AVENUE, STE 2200, DENVER, CO 80237 USA	0015-511X			FOCUS EXCEPT CHILD	Focus Except. Child	APR	2010	42	8
J	Wang, MT; Sheikh-Khalil, S				Wang, Ming-Te; Sheikh-Khalil, Salam			Does Parental Involvement Matter for Student Achievement and Mental Health in High School?	CHILD DEVELOPMENT			English	Article							AFRICAN-AMERICAN STUDENTS; ACADEMIC SELF-EFFICACY; MIDDLE SCHOOL; SOCIAL SUPPORT; UNITED-STATES; ENGAGEMENT; YOUTH; TRAJECTORIES; DELINQUENCY; ADOLESCENCE	Parental involvement in education remains important for facilitating positive youth development. This study conceptualized parental involvement as a multidimensional constructincluding school-based involvement, home-based involvement, and academic socializationand examined the effects of different types of parental involvement in 10th grade on student achievement and depression in 11th grade (app…	[Wang, Ming-Te] Univ Pittsburgh, Pittsburgh, PA 15260 USA; [Sheikh-Khalil, Salam] Univ Michigan, Ann Arbor, MI 48109 USA	Pennsylvania Commonwealth System of Higher Education (PCSHE); University of Pittsburgh; University of Michigan System; University of Michigan	Wang, MT (corresponding author), 230 South Bouquet St, Pittsburgh, PA 15260 USA.	mtwang@pitt.edu	Wang, Ming-Te/HCH-2285-2022						73	283	533	25	202	WILEY	HOBOKEN	111 RIVER ST, HOBOKEN 07030-5774, NJ USA	0009-3920	1467-8624		CHILD DEV	Child Dev.	MAR	2014	85	2
J	Roth, G; Assor, A; Niemiec, CP; Ryan, RA; Deci, EL				Roth, Guy; Assor, Avi; Niemiec, Christopher P.; Ryan, Richard A.; Deci, Edward L.			The Emotional and Academic Consequences of Parental Conditional Regard: Comparing Conditional Positive Regard, Conditional Negative Regard, and Autonomy Support as Parenting Practices	DEVELOPMENTAL PSYCHOLOGY			English	Article						parental conditional regard; autonomy support; emotion regulation; academic engagement	SELF-DETERMINATION THEORY; PSYCHOLOGICAL CONTROL; TEACHER BEHAVIORS; MOTIVATION; STRATEGIES; REACTIVITY; PREDICTORS; ENGAGEMENT	The authors conducted 2 studies of 9th-grade Israeli adolescents (169 in Study 1, 156 in Study 2) to compare the parenting practices of conditional positive regard, conditional negative regard, and autonomy support using data from multiple reporters. Two socialization domains were studied: emotion control and academics. Results were consistent with the self-determination theory model of internali…	[Roth, Guy; Assor, Avi] Ben Gurion Univ Negev, Dept Educ, IL-84105 Beer Sheva, Israel; [Niemiec, Christopher P.; Ryan, Richard A.; Deci, Edward L.] Univ Rochester, Dept Clin & Social Sci Psychol, Rochester, NY 14627 USA	Ben Gurion University; University of Rochester	Roth, G (corresponding author), Ben Gurion Univ Negev, Dept Educ, POB 653, IL-84105 Beer Sheva, Israel.	roth@bgu.ac.il	Ryan, Richard M./H-1459-2019; Deci, Edward L./Y-4790-2019; Roth, Guy/F-1496-2012	Ryan, Richard M./0000-0002-2355-6154; Deci, Edward L./0000-0001-8246-8536; Roth, Guy/0000-0002-5662-7561					66	269	335	13	178	AMER PSYCHOLOGICAL ASSOC	WASHINGTON	750 FIRST ST NE, WASHINGTON, DC 20002-4242 USA	0012-1649	1939-0599		DEV PSYCHOL	Dev. Psychol.	JUL	2009	45	4
J	Gasiewski, JA; Eagan, MK; Garcia, GA; Hurtado, S; Chang, MJ				Gasiewski, Josephine A.; Eagan, M. Kevin; Garcia, Gina A.; Hurtado, Sylvia; Chang, Mitchell J.			From Gatekeeping to Engagement: A Multicontextual, Mixed Method Study of Student Academic Engagement in Introductory STEM Courses	RESEARCH IN HIGHER EDUCATION			English	Article						Introductory courses; STEM; Mixed methods; Student engagement; Gatekeepers; Active learning	CLASSROOM; PARTICIPATION; ACHIEVEMENT; PERCEPTIONS; INVOLVEMENT; MOTIVATION; THINKING; SUCCESS; GAINS	The lack of academic engagement in introductory science courses is considered by some to be a primary reason why students switch out of science majors. This study employed a sequential, explanatory mixed methods approach to provide a richer understanding of the relationship between student engagement and introductory science instruction. Quantitative survey data were drawn from 2,873 students wit…	[Gasiewski, Josephine A.; Eagan, M. Kevin; Garcia, Gina A.; Hurtado, Sylvia; Chang, Mitchell J.] Univ Calif Los Angeles, Los Angeles, CA 90095 USA	University of California System; University of California Los Angeles	Gasiewski, JA (corresponding author), Univ Calif Los Angeles, 405 Hilgard Ave,3005 Moore Hall, Los Angeles, CA 90095 USA.	joski@ucla.edu	Hurtado, Sylvia/E-2561-2011; Eagan, Kevin/C-1260-2009	Eagan, Kevin/0000-0002-1936-0204; Hurtado, Sylvia/0000-0002-1530-9970; Garcia, Gina Ann/0000-0002-6706-9200	Division Of Undergraduate Education; Direct For Education and Human Resources [0757076] Funding Source: National Science Foundation	Division Of Undergraduate Education; Direct For Education and Human Resources(National Science Foundation (NSF)NSF - Directorate for STEM Education (EDU))			96	263	458	2	132	SPRINGER	NEW YORK	ONE NEW YORK PLAZA, SUITE 4600, NEW YORK, NY, UNITED STATES	0361-0365	1573-188X		RES HIGH EDUC	Res. High. Educ.	MAR	2012	53	2
J	Juvonen, J; Nishina, A; Graham, S				Juvonen, J; Nishina, A; Graham, S			Ethnic diversity and perceptions of safety in urban middle schools	PSYCHOLOGICAL SCIENCE			English	Article							PEER VICTIMIZATION; SELF-CONCEPT; DESEGREGATION; IMPACT; DISSONANCE; CONTACT; ESTEEM	Students' perceptions of their safety and vulnerability were investigated in 11 public middle schools (more than 70 sixth-grade classrooms) that varied in ethnic diversity. Results of hierarchical linear modeling analyses indicate that higher classroom diversity is associated with feelings of safety and social satisfaction. African American (n = 511) and Latino (n = 910) students felt safer in sc…	Univ Calif Los Angeles, Dept Psychol, Los Angeles, CA 90095 USA; Univ Calif Davis, Dept Human & Community Dev, Davis, CA 95616 USA; Univ Calif Los Angeles, Dept Educ, Los Angeles, CA 90095 USA	University of California System; University of California Los Angeles; University of California System; University of California Davis; University of California System; University of California Los Angeles	Univ Calif Los Angeles, Dept Psychol, Los Angeles, CA 90095 USA.	juvonen@psych.ucla.edu							33	255	348	0	29	SAGE PUBLICATIONS INC	THOUSAND OAKS	2455 TELLER RD, THOUSAND OAKS, CA 91320 USA	0956-7976	1467-9280		PSYCHOL SCI	Psychol. Sci.	MAY	2006	17	5
J	Antaramian, SP; Huebner, ES; Hills, KJ; Valois, RF				Antaramian, Susan P.; Huebner, E. Scott; Hills, Kimberly J.; Valois, Robert F.			A Dual-Factor Model of Mental Health: Toward a More Comprehensive Understanding of Youth Functioning	AMERICAN JOURNAL OF ORTHOPSYCHIATRY			English	Article						middle school students; positive mental health; subjective well-being; psychopathology; student engagement; academic achievement; school climate	LIFE SATISFACTION; STUDENT ENGAGEMENT; SCHOOL; ADOLESCENTS; VALIDATION; CHILDREN; SCALE; STATE	Traditional mental health models focus on psychological problems and distress; accordingly, health is viewed as the absence of illness or disability. In contrast, a dual-factor model of mental health incorporates both indicators of positive subjective well-being (SWB) and measures of psychopathological symptoms to comprehensively determine an individual's psychological adjustment. This study used…	[Huebner, E. Scott] Univ S Carolina, Dept Psychol, Columbia, SC 29208 USA	University of South Carolina System; University of South Carolina Columbia	Huebner, ES (corresponding author), Univ S Carolina, Dept Psychol, Barnwell Hall 237B, Columbia, SC 29208 USA.	huebner@sc.edu		Antaramian, Susan/0000-0002-3957-5683	American Orthopsychiatric Association; Clemson University Institute on Family and Neighborhood Life; International Family Therapy Association; International Society for Child Indicators	American Orthopsychiatric Association; Clemson University Institute on Family and Neighborhood Life; International Family Therapy Association; International Society for Child Indicators	This article is based on a plenary address presented at the Second Greenville Family Symposium (cosponsored by the American Orthopsychiatric Association, the Clemson University Institute on Family and Neighborhood Life, the International Family Therapy Association, and the International Society for Child Indicators) at University Center in Greenville, SC, in April 2010.		42	246	347	16	103	AMER PSYCHOLOGICAL ASSOC	WASHINGTON	750 FIRST ST NE, WASHINGTON, DC 20002-4242 USA	0002-9432	1939-0025		AM J ORTHOPSYCHIAT	Am. J. Orthopsychiatr.	OCT	2010	80	4
J	Greenberg, MT; Bierman, KL; Coie, JD; Dodge, KA; Lochman, JE; McMahon, RJ; Pinderhughes, E				Greenberg, Mark T.; Bierman, Karen L.; Coie, John D.; Dodge, Kenneth A.; Lochman, John E.; McMahon, Robert J.; Pinderhughes, Ellen		Conduct Problems Prevention Res Gr	The Effects of a Multiyear Universal Social-Emotional Learning Program: The Role of Student and School Characteristics	JOURNAL OF CONSULTING AND CLINICAL PSYCHOLOGY			English	Article						prevention; school; aggression; social competence; academic engagement	ANTISOCIAL-BEHAVIOR; CLASSROOM ENVIRONMENT; AGGRESSIVE-BEHAVIOR; 1ST-GRADE CLASSROOM; PREVENTION PROGRAMS; ELEMENTARY-SCHOOL; CHILDREN; COMPETENCE; INTERVENTION; OUTCOMES	Objective: This article examines the impact of a universal social-emotional learning program, the Fast Track PATHS (Promoting Alternative Thinking Strategies) curriculum and teacher consultation, embedded within the Fast Track selective prevention model. Method: The longitudinal analysis involved 2,937 children of multiple ethnicities who remained in the same intervention or control schools for G…	[Greenberg, Mark T.] Penn State Univ, Prevent Res Ctr, Dept Human Dev & Family Studies, University Pk, PA 16802 USA; [Bierman, Karen L.] Penn State Univ, Dept Psychol, University Pk, PA 16802 USA; [Coie, John D.] Duke Univ, Dept Psychol, Durham, NC 27706 USA; [Dodge, Kenneth A.] Duke Univ, Ctr Child & Family Policy, Durham, NC 27706 USA; [Lochman, John E.] Univ Alabama, Dept Psychol, Tuscaloosa, …	Pennsylvania Commonwealth System of Higher Education (PCSHE); Pennsylvania State University; Pennsylvania State University - University Park; Pennsylvania Commonwealth System of Higher Education (PCSHE); Pennsylvania State University; Pennsylvania State University - University Park; Duke University; Duke University; University of Alabama System; University of Alabama Tuscaloosa; University of Was…	Greenberg, MT (corresponding author), Penn State Univ, Prevent Res Ctr, Dept Human Dev & Family Studies, Henderson S-112, University Pk, PA 16802 USA.	mxg47@psu.edu		McMahon, Robert/0000-0002-4034-5818	NIDA NIH HHS [K05 DA015226, K05DA15226] Funding Source: Medline; NIMH NIH HHS [R01 MH62988, R18 MH050953, R18 MH50951, K05MH00797, R18 MH050952, R01 MH062988, R18 MH50952, R18 MH50953, R01 MH050953, K05 MH000797, R18 MH48403, R18 MH050951] Funding Source: Medline	NIDA NIH HHS(United States Department of Health & Human ServicesNational Institutes of Health (NIH) - USANIH National Institute on Drug Abuse (NIDA)); NIMH NIH HHS(United States Department of Health & Human ServicesNational Institutes of Health (NIH) - USANIH National Institute of Mental Health (NIMH))			58	239	389	3	129	AMER PSYCHOLOGICAL ASSOC	WASHINGTON	750 FIRST ST NE, WASHINGTON, DC 20002-4242 USA	0022-006X	1939-2117		J CONSULT CLIN PSYCH	J. Consult. Clin. Psychol.	APR	2010	78	2
J	Kindermann, TA				Kindermann, Thomas A.			Effects of naturally existing peer groups on changes in academic engagement in a cohort of sixth graders	CHILD DEVELOPMENT			English	Article							SOCIAL NETWORK CENTRALITY; AFRICAN-AMERICAN; INDIVIDUAL DEVELOPMENT; CHILDRENS ENGAGEMENT; SCHOOL; ACHIEVEMENT; MOTIVATION; BEHAVIOR; FRIENDS; CONTEXT	This study examined the effects of peer groups on changes in academic engagement in 11- to 13-year-old children. From the entire cohort of 366 sixth graders in a town, 87% participated at the beginning and end of the school year. Peer groups were assessed using socio-cognitive mapping; as an indicator of motivation, teachers reported on students' classroom engagement. Peer groups were homogeneous…	Portland State Univ, Dept Psychol, Portland, OR 97207 USA	Portland State University	Kindermann, TA (corresponding author), Portland State Univ, Dept Psychol, POB 751, Portland, OR 97207 USA.	kindermannt@pdx.edu	Kindermann, Thomas A/A-5307-2008	Kindermann, Thomas A/0000-0003-4546-9649	NICHD NIH HHS [1R15 HD37848-01, 1R15HD31687-01] Funding Source: Medline	NICHD NIH HHS(United States Department of Health & Human ServicesNational Institutes of Health (NIH) - USANIH Eunice Kennedy Shriver National Institute of Child Health & Human Development (NICHD))			74	230	338	3	63	WILEY	HOBOKEN	111 RIVER ST, HOBOKEN 07030-5774, NJ USA	0009-3920	1467-8624		CHILD DEV	Child Dev.	JUL-AUG	2007	78	4
J	Juvonen, J; Wang, YY; Espinoza, G				Juvonen, Jaana; Wang, Yueyan; Espinoza, Guadalupe			Bullying Experiences and Compromised Academic Performance Across Middle School Grades	JOURNAL OF EARLY ADOLESCENCE			English	Article						bullying; academic performance; middle school; longitudinal research	PEER VICTIMIZATION; SELF-CONCEPT; ADJUSTMENT; HARASSMENT; EXCLUSION; REJECTION	The goal of the study was to examine whether bullying experiences are associated with lower academic performance across middle school among urban students. The ethnically diverse sample was drawn from a longitudinal study of 2,300 sixth graders (44% Latino, 26% African American, 10% Asian, 10% White, and 10% mixed) from 11 public middle schools. Results of multilevel models (MLMs) showed that gra…	[Juvonen, Jaana] Univ Calif Los Angeles, Dept Psychol, Dev Psychol Program, Los Angeles, CA 90095 USA	University of California System; University of California Los Angeles	Juvonen, J (corresponding author), Univ Calif Los Angeles, Dept Psychol, Dev Psychol Program, Los Angeles, CA 90095 USA.	j_juvonen@yahoo.com	Wang, Yueyan/C-1863-2017						31	229	259	7	84	SAGE PUBLICATIONS INC	THOUSAND OAKS	2455 TELLER RD, THOUSAND OAKS, CA 91320 USA	0272-4316	1552-5449		J EARLY ADOLESCENCE	J. Early Adolesc.	FEB	2011	31	1
J	Schwanen, T; Banister, D; Anable, J				Schwanen, Tim; Banister, David; Anable, Jillian			Scientific research about climate change mitigation in transport: A critical review	TRANSPORTATION RESEARCH PART A-POLICY AND PRACTICE			English	Article						Climate change mitigation; Governmentality; Technology; Carbon economy; Behaviour change; Institutions	GREENHOUSE-GAS EMISSIONS; ECOLOGICAL MODERNIZATION; PASSENGER TRANSPORT; MULTILEVEL ANALYSIS; CO2 EMISSIONS; CAR USE; TRANSITIONS; CONSUMPTION; CALIFORNIA; REDUCTION	This paper seeks to develop a deeper understanding of the research on climate change mitigation in transport. We suggest that work to date has focused on the effects of improvements in transport technologies, changes in the price of transport, physical infrastructure provision, behavioural change and alternative institutional arrangements for governing transport systems. In terms of research meth…	[Schwanen, Tim; Banister, David] Univ Oxford, Sch Geog & Environm, Transport Studies Unit, Oxford OX1 3QY, England; [Anable, Jillian] Univ Aberdeen, Sch Geosci, Ctr Transport Res, Aberdeen AB9 1FX, Scotland	University of Oxford; University of Aberdeen	Schwanen, T (corresponding author), Univ Oxford, Sch Geog & Environm, Transport Studies Unit, S Parks Rd, Oxford OX1 3QY, England.	tim.schwanen@ouce.ox.ac.uk	Schwanen, Tim/ABE-6070-2021	Anable, Jillian/0000-0002-4259-1641	UKTRC: Climate Change, Energy and Transport by the ESRC [RES-584-28-0002]; NERC [NE/G007748/1] Funding Source: UKRI	UKTRC: Climate Change, Energy and Transport by the ESRC; NERC(UK Research & Innovation (UKRI)Natural Environment Research Council (NERC))	The research in this paper has been made possible by grant RES-584-28-0002, UKTRC: Climate Change, Energy and Transport by the ESRC. The authors thank the reviewers and Deb Niemeier for their helpful comments on a previous version of the paper.		107	219	228	6	153	PERGAMON-ELSEVIER SCIENCE LTD	OXFORD	THE BOULEVARD, LANGFORD LANE, KIDLINGTON, OXFORD OX5 1GB, ENGLAND	0965-8564	1879-2375		TRANSPORT RES A-POL	Transp. Res. Pt. A-Policy Pract.	DEC	2011	45	10
J	Bradshaw, CP; Mitchell, MM; O'Brennan, LM; Leaf, PJ				Bradshaw, Catherine P.; Mitchell, Mary M.; O'Brennan, Lindsey M.; Leaf, Philip J.			Multilevel Exploration of Factors Contributing to the Overrepresentation of Black Students in Office Disciplinary Referrals	JOURNAL OF EDUCATIONAL PSYCHOLOGY			English	Article						Black; office discipline referrals; behavior problems; teachers; multilevel modeling	AFRICAN-AMERICAN; ELEMENTARY-SCHOOL; PREVENTIVE INTERVENTIONS; AGGRESSIVE-BEHAVIOR; ANTISOCIAL-BEHAVIOR; ACADEMIC ENGAGEMENT; TEACHER RATINGS; VIOLENCE; PERCEPTIONS; DISORDER	Although there is increasing awareness of the overrepresentation of ethic minority students particularly Black students in disciplinary actions, the extant research has rarely empirically examined potential factors that may contribute to these disparities. The current study used a multilevel modeling approach to examine factors at the child (e.g., teacher-rated disruptive behavior problems) and c…	[Bradshaw, Catherine P.] Johns Hopkins Univ, Johns Hopkins Bloomberg Sch Publ Hlth, Dept Mental Hlth, Johns Hopkins Ctr Prevent Youth Violence, Baltimore, MD 21205 USA	Johns Hopkins University; Johns Hopkins Bloomberg School of Public Health	Bradshaw, CP (corresponding author), Johns Hopkins Univ, Johns Hopkins Bloomberg Sch Publ Hlth, Dept Mental Hlth, Johns Hopkins Ctr Prevent Youth Violence, 624 N Broadway, Baltimore, MD 21205 USA.	cbradsha@jhsph.edu							65	218	447	2	30	AMER PSYCHOLOGICAL ASSOC	WASHINGTON	750 FIRST ST NE, WASHINGTON, DC 20002-4242 USA	0022-0663	1939-2176		J EDUC PSYCHOL	J. Educ. Psychol.	MAY	2010	102	2
J	Anderson, AR; Christenson, SL; Sinclair, MF; Lehr, CA				Anderson, AR; Christenson, SL; Sinclair, MF; Lehr, CA			Check & Connect: The importance of relationships for promoting engagement with school	JOURNAL OF SCHOOL PSYCHOLOGY			English	Article						engagement; relationships	TEACHER-STUDENT RELATIONSHIP; MIDDLE SCHOOL; CHILDRENS ENGAGEMENT; ADOLESCENTS; MOTIVATION; ADJUSTMENT; PREVENTION; CONTEXT; DROPOUT; PARTICIPATION	The purpose of this study was to examine whether the closeness and quality of relationships between intervention staff and students involved in the Check & Connect program were associated with improved student engagement in school. Participants included 80 elementary and middle school students referred to the Check & Connect program for poor attendance, an early sign of disengagement, while in el…	Univ Minnesota, Dept Educ Psychol, Sch Psychol Program, Minneapolis, MN 55455 USA	University of Minnesota System; University of Minnesota Twin Cities	Univ Minnesota, Dept Educ Psychol, Sch Psychol Program, 350 Elliot Hall,75 E River Rd, Minneapolis, MN 55455 USA.	ande2654@umn.edu		Reschly, Amy/0000-0001-9379-162X					61	215	418	4	44	PERGAMON-ELSEVIER SCIENCE LTD	OXFORD	THE BOULEVARD, LANGFORD LANE, KIDLINGTON, OXFORD OX5 1GB, ENGLAND	0022-4405	1873-3506		J SCHOOL PSYCHOL	J. Sch. Psychol.	MAR-APR	2004	42	2
J	Middleton, J				Middleton, Jennie			Sense and the city: exploring the embodied geographies of urban walking	SOCIAL & CULTURAL GEOGRAPHY			English	Article						walking; senses; embodiment; the city; pedestrian policy	ENVIRONMENTS; EXPERIENCES; POLICY; DIARY; MOBILITIES; LANDSCAPE; RELEVANCE; WORLDS; SPACE; SELF	Within UK pedestrian policy, walking is promoted as a sustainable mode of transport that benefits both the body and mind. However, much policy discussion assumes all walking to be the same and a largely self-evident means of transport, whilst many academic engagements with walking are highly abstract theorisations that lack any systematic empirical exploration of actual pedestrian practices. As s…	Univ Plymouth, Dept Geog Earth & Environm Sci, Plymouth PL4 8AA, Devon, England	University of Plymouth	Middleton, J (corresponding author), Univ Plymouth, Dept Geog Earth & Environm Sci, Plymouth PL4 8AA, Devon, England.	jennie.middleton@plymouth.ac.k			ESRC [ES/E016383/1] Funding Source: UKRI	ESRC(UK Research & Innovation (UKRI)Economic & Social Research Council (ESRC))			123	206	235	10	97	ROUTLEDGE JOURNALS, TAYLOR & FRANCIS LTD	ABINGDON	2-4 PARK SQUARE, MILTON PARK, ABINGDON OX14 4RN, OXON, ENGLAND	1464-9365	1470-1197		SOC CULT GEOGR	Soc. Cult. Geogr.		2010	11	6
J	Bradshaw, CP; Waasdorp, TE; Debnam, KJ; Johnson, SL				Bradshaw, Catherine P.; Waasdorp, Tracy E.; Debnam, Katrina J.; Johnson, Sarah Lindstrom			Measuring School Climate in High Schools: A Focus on Safety, Engagement, and the Environment	JOURNAL OF SCHOOL HEALTH			English	Article						school climate; safety; engagement; environment; school improvement; measurement	POSITIVE BEHAVIORAL INTERVENTIONS; FIT INDEXES; STUDENT; COMMUNITIES; CONNECTEDNESS; PERCEPTIONS; PREDICTORS; MULTILEVEL; INVARIANCE; ATTITUDES	BACKGROUND: School climate has been linked to multiple student behavioral, academic, health, and social-emotional outcomes. The US Department of Education (USDOE) developed a 3-factor model of school climate comprised of safety, engagement, and environment. This article examines the factor structure and measurement invariance of the USDOE model. METHODS: Drawing upon 2 consecutive waves of data f…	[Bradshaw, Catherine P.; Waasdorp, Tracy E.; Debnam, Katrina J.] Johns Hopkins Bloomberg Sch Publ Hlth, Johns Hopkins Ctr Prevent Youth Violence, Baltimore, MD 21295 USA; [Johnson, Sarah Lindstrom] Johns Hopkins Sch Med, Baltimore, MD 21287 USA	Johns Hopkins University; Johns Hopkins Bloomberg School of Public Health; Johns Hopkins University; Johns Hopkins Medicine	Bradshaw, CP (corresponding author), Johns Hopkins Bloomberg Sch Publ Hlth, Johns Hopkins Ctr Prevent Youth Violence, 624 North Broadway, Baltimore, MD 21295 USA.	cbradsha@jhsph.edu; twaasdor@jhsph.edu; kdebnam@jhsph.edu; slj@jhmi.edu	Waasdorp, Tracy/X-6281-2019	Waasdorp, Tracy/0000-0002-6176-7817	US Department of Education; William T. Grant Foundation; Maryland State Department of Education and Sheppard Pratt Health System through the Maryland Safe and Supportive Schools Project	US Department of Education(US Department of Education); William T. Grant Foundation; Maryland State Department of Education and Sheppard Pratt Health System through the Maryland Safe and Supportive Schools Project	This work was funded in part by grants from the US Department of Education and William T. Grant Foundation awarded to Catherine Bradshaw of Johns Hopkins University. We would like to thank the Maryland State Department of Education and Sheppard Pratt Health System for their support of this research through the Maryland Safe and Supportive Schools Project.		65	202	357	13	175	WILEY	HOBOKEN	111 RIVER ST, HOBOKEN 07030-5774, NJ USA	0022-4391	1746-1561		J SCHOOL HEALTH	J. Sch. Health	SEP	2014	84	9
J	Fall, AM; Roberts, G				Fall, Anna-Maria; Roberts, Greg			High school dropouts: Interactions between social context, self-perceptions, school engagement, and student dropout	JOURNAL OF ADOLESCENCE			English	Article						Teacher support; Parent support; Behavioral engagement; Academic engagement; Dropping out of high school; Self-perceptions; Academic achievement	ACADEMIC-ACHIEVEMENT; ADOLESCENTS PERCEPTIONS; CLASSROOM; MEDIATION; MODEL; ENVIRONMENT; AMERICAN; MOBILITY; RISK; PREDICTORS	Research suggests that contextual, self-system, and school engagement variables influence dropping out from school. However, it is not clear how different types of contextual and self-system variables interact to affect students' engagement or contribute to decisions to dropout from high school. The self-system model of motivational development represents a promising theory for understanding this…	[Fall, Anna-Maria; Roberts, Greg] Univ Texas Austin, Meadows Ctr Preventing Educ Risk, Austin, TX 78712 USA	University of Texas System; University of Texas Austin	Fall, AM (corresponding author), Univ Texas Austin, Meadows Ctr Preventing Educ Risk, 1 Univ Stn D4900, Austin, TX 78712 USA.	amfall@austin.utexas.edu	Fall, Anna-Maria/E-9828-2013; Roberts, Greg/GWV-5653-2022	Roberts, Greg/0000-0002-3636-8590					75	198	367	3	135	WILEY	HOBOKEN	111 RIVER ST, HOBOKEN 07030-5774, NJ USA	0140-1971	1095-9254		J ADOLESCENCE	J. Adolesc.	AUG	2012	35	4
J	Greenwood, CR; Horton, BT; Utley, CA				Greenwood, CR; Horton, BT; Utley, CA			Academic engagement: Current perspectives on research and practice	SCHOOL PSYCHOLOGY REVIEW			English	Article							STUDENTS; DISABILITIES; ACHIEVEMENT; BEHAVIOR	Classroom behaviors that enable academic learning are the focus of this article. A brief perspective is offered on the development and validation of one enabler-engagement in academic responding-and recent findings are provided of an effort to bridge the gap between research and practice by employing this knowledge in Tide 1 elementary schools to improve instruction. In prior research, the author…	Univ Kansas, Schiefelbusch Inst Life Span Studies, Lawrence, KS 66045 USA	University of Kansas	Greenwood, CR (corresponding author), Juniper Gardens Childrens Project, 650 Minnesota Ave,2nd Floor, Kansas City, KS 66101 USA.			Greenwood, Charles/0000-0002-6274-3075					42	187	365	0	13	NATL ASSN SCHOOL PSYCHOLOGISTS	BETHESDA	4340 EAST WEST HWY, STE 402, BETHESDA, MD 20814 USA	0279-6015			SCHOOL PSYCHOL REV	Sch. Psychol. Rev.		2002	31	3
J	Lam, SF; Jimerson, S; Kikas, E; Cefai, C; Veiga, FH; Nelson, B; Hatzichristou, C; Polychroni, F; Basnett, J; Duck, R; Farrell, P; Liu, Y; Negovan, V; Shin, H; Stanculescu, E; Wong, BPH; Yang, HF; Zollneritsch, J				Lam, Shui-fong; Jimerson, Shane; Kikas, Eve; Cefai, Carmel; Veiga, Feliciano H.; Nelson, Brett; Hatzichristou, Chryse; Polychroni, Fotini; Basnett, Julie; Duck, Robert; Farrell, Peter; Liu, Yi; Negovan, Valeria; Shin, Hyeonsook; Stanculescu, Elena; Wong, Bernard P. H.; Yang, Hongfei; Zollneritsch, Josef			Do girls and boys perceive themselves as equally engaged in school? The results of an international study from 12 countries	JOURNAL OF SCHOOL PSYCHOLOGY			English	Article						Academic performance; Gender differences; Student engagement; Teacher support; Parent support; Peer support	TEACHER-CHILD RELATIONSHIP; SEX-DIFFERENCES; STUDENT ENGAGEMENT; GENDER-DIFFERENCES; MEDIATING ROLE; SELF-EFFICACY; ACHIEVEMENT; MOTIVATION; PERSONALITY; INVOLVEMENT	This study examined gender differences in student engagement and academic performance in school. Participants included 3420 students (7th, 8th, and 9th graders) from Austria, Canada, China, Cyprus, Estonia, Greece, Malta, Portugal, Romania, South Korea, the United Kingdom, and the United States. The results indicated that, compared to boys, girls reported higher levels of engagement in school and…	[Lam, Shui-fong] Univ Hong Kong, Dept Psychol, Hong Kong, Hong Kong, Peoples R China; [Jimerson, Shane] Univ Calif Santa Barbara, Santa Barbara, CA 93106 USA; [Kikas, Eve] Univ Tartu, Tartu, Estonia; [Kikas, Eve] Tallinn Univ, Tallinn, Estonia; [Cefai, Carmel] Univ Malta, Msida, Malta; [Veiga, Feliciano H.] Univ Lisbon, P-1699 Lisbon, Portugal; [Nelson, Brett] Calif State Univ San Bernardino, San…	University of Hong Kong; University of California System; University of California Santa Barbara; University of Tartu; Tallinn University; University of Malta; Universidade de Lisboa; California State University System; California State University San Bernardino; National & Kapodistrian University of Athens; Laurentian University; University of Manchester; University of Bucharest; Chonnam Nationa…	Lam, SF (corresponding author), Univ Hong Kong, Dept Psychol, Pokfulam Rd, Hong Kong, Hong Kong, Peoples R China.	lamsf@hku.hk	Stănculescu, Elena/AAU-8790-2021; Polychroni, Fotini/JPA-1431-2023; Stănculescu, Elena/GRJ-4702-2022; Jimerson, Shane/AAK-7031-2020; Veiga, Feliciano/M-1335-2019; Yang, Hongfei/IXD-7425-2023; Polychroni, Fotini/AAN-9458-2021; Kikas, Eve/I-1867-2018	Stănculescu, Elena/0000-0002-3912-812X; Stănculescu, Elena/0000-0002-3912-812X; Veiga, Feliciano/0000-0002-2977-6238; Yang, Hongfei/0000-0001-5451-6887; Polychroni, Fotini/0000-0002-1550-3271; Wong, Bernard/0000-0003-0443-5100; Kikas, Eve/0000-0003-2337-8930; Jimerson, Shane/0000-0003-2685-7486					83	187	233	2	89	PERGAMON-ELSEVIER SCIENCE LTD	OXFORD	THE BOULEVARD, LANGFORD LANE, KIDLINGTON, OXFORD OX5 1GB, ENGLAND	0022-4405	1873-3506		J SCHOOL PSYCHOL	J. Sch. Psychol.	FEB	2012	50	1
J	Wang, MT; Degol, J				Wang, Ming-Te; Degol, Jessica			Staying Engaged: Knowledge and Research Needs in Student Engagement	CHILD DEVELOPMENT PERSPECTIVES			English	Article						student engagement; school engagement; malleability; multidimensionality; intervention	SCHOOL ENGAGEMENT; PARENTAL INVOLVEMENT; COGNITIVE ENGAGEMENT; ACADEMIC ENGAGEMENT; MENTAL-HEALTH; ACHIEVEMENT; EMOTIONS; SUPPORT; TRAJECTORIES; ADOLESCENCE	In this article, we review knowledge about student engagement and look ahead to the future of study in this area. We begin by describing how researchers in the field define and study student engagement. In particular, we describe the levels, contexts, and dimensions that constitute the measurement of engagement, summarize the contexts that shape engagement and the outcomes that result from it, an…	[Wang, Ming-Te] Univ Pittsburgh, Dept Psychol, Sch Educ, Learning Res & Dev Ctr, Pittsburgh, PA 15260 USA; [Degol, Jessica] Univ Pittsburgh, Sch Educ, Pittsburgh, PA 15260 USA	Pennsylvania Commonwealth System of Higher Education (PCSHE); University of Pittsburgh; Pennsylvania Commonwealth System of Higher Education (PCSHE); University of Pittsburgh	Wang, MT (corresponding author), Univ Pittsburgh, Dept Psychol, 230 South Bouquet St, Pittsburgh, PA 15260 USA.	mtwang@pitt.edu	Wang, Ming-Te/HCH-2285-2022		Direct For Education and Human Resources; Division Of Research On Learning [1315943] Funding Source: National Science Foundation	Direct For Education and Human Resources; Division Of Research On Learning(National Science Foundation (NSF)NSF - Directorate for STEM Education (EDU))			42	187	252	5	91	WILEY	HOBOKEN	111 RIVER ST, HOBOKEN 07030-5774, NJ USA	1750-8592	1750-8606		CHILD DEV PERSPECT	Child Develop. Perspect.	SEP	2014	8	3
J	Gillen-O'Neel, C; Fuligni, A				Gillen-O'Neel, Cari; Fuligni, Andrew			A Longitudinal Study of School Belonging and Academic Motivation Across High School	CHILD DEVELOPMENT			English	Article							ADOLESCENTS; STUDENTS; SUPPORT; ACHIEVEMENT; ENGAGEMENT; MIDDLE; IDENTIFICATION; PARTICIPATION; PERCEPTIONS; PERFORMANCE	This longitudinal study examined how school belonging changes over the years of high school, and how it is associated with academic achievement and motivation. Students from Latin American, Asian, and European backgrounds participated (N=572; age span=13.9419.15years). In ninth grade, girls' school belonging was higher than boys'. Over the course of high school, however, girls' school belonging d…	[Gillen-O'Neel, Cari; Fuligni, Andrew] Univ Calif Los Angeles, Los Angeles, CA 90095 USA	University of California System; University of California Los Angeles	Gillen-O'Neel, C (corresponding author), Univ Calif Los Angeles, Dept Psychol, 1285 Franz Hall, Los Angeles, CA 90095 USA.	c.go@ucla.edu							64	185	299	4	73	WILEY	HOBOKEN	111 RIVER ST, HOBOKEN 07030-5774, NJ USA	0009-3920	1467-8624		CHILD DEV	Child Dev.	MAR-APR	2013	84	2
J	Sakiz, G; Pape, SJ; Hoy, AW				Sakiz, Gonul; Pape, Stephen J.; Hoy, Anita Woolfolk			Does perceived teacher affective support matter for middle school students in mathematics classrooms?	JOURNAL OF SCHOOL PSYCHOLOGY			English	Article						Teacher affective support; Sense of belonging; Academic self-efficacy; Academic enjoyment; Academic hopelessness; Academic effort in mathematics	PERSON-ENVIRONMENT FIT; SELF-EFFICACY; ACADEMIC ENGAGEMENT; CHILD RELATIONSHIPS; MOTIVATION; ACHIEVEMENT; PREDICTORS; PERCEPTIONS; ADOLESCENTS; RELATEDNESS	The purpose of the present study was to explore the importance of perceived teacher affective support in relation to sense of belonging, academic enjoyment, academic hopelessness, academic self-efficacy, and academic effort in middle school mathematics classrooms. A self-report survey was administered to 317 seventh- and eighth-grade students in 5 public middle schools. Structural equation modeli…	[Sakiz, Gonul] Marmara Univ, Ataturk Fac Educ, Dept Elementary Educ, TR-34722 Istanbul, Turkey; [Pape, Stephen J.] Univ Florida, Sch Teaching & Learning, Gainesville, FL 32611 USA; [Hoy, Anita Woolfolk] Ohio State Univ, Sch Educ Policy & Leadership, Columbus, OH 43210 USA	Marmara University; State University System of Florida; University of Florida; University System of Ohio; Ohio State University	Sakiz, G (corresponding author), Marmara Univ, Ataturk Fac Educ, Dept Elementary Educ, TR-34722 Istanbul, Turkey.	gonul.sakiz@marmara.edu.tr	Sakiz, Gonul/X-4972-2019	Sakiz, Gonul/0000-0002-7095-9554; Pape, Stephen/0000-0002-5738-2981					106	179	255	10	103	PERGAMON-ELSEVIER SCIENCE LTD	OXFORD	THE BOULEVARD, LANGFORD LANE, KIDLINGTON, OXFORD OX5 1GB, ENGLAND	0022-4405	1873-3506		J SCHOOL PSYCHOL	J. Sch. Psychol.	APR	2012	50	2
J	Ladd, GW; Ettekal, I; Kochenderfer-Ladd, B				Ladd, Gary W.; Ettekal, Idean; Kochenderfer-Ladd, Becky			Peer Victimization Trajectories From Kindergarten Through High School: Differential Pathways for Children's School Engagement and Achievement?	JOURNAL OF EDUCATIONAL PSYCHOLOGY			English	Article						peer victimization; trajectories of peer victimization; peer relations; school engagement; achievement	FIT INDEXES; DEVELOPMENTAL TRAJECTORIES; CLASSROOM PARTICIPATION; ACADEMIC-ACHIEVEMENT; PREVALENCE; ADJUSTMENT; GROWTH; ASSOCIATION; EXPERIENCES; PREDICTORS	This investigation's aims were to map prevalence, normative trends, and patterns of continuity or change in school-based peer victimization throughout formal schooling (i.e., Grades K-12), and determine whether specific victimization patterns (i.e., differential trajectories) were associated with children's academic performance. A sample of 383 children (193 girls) was followed from kindergarten …	[Ladd, Gary W.; Ettekal, Idean; Kochenderfer-Ladd, Becky] Arizona State Univ, T Denny Sanford Sch Social & Family Dynam, Tempe, AZ 85287 USA; [Ladd, Gary W.] Arizona State Univ, Dept Psychol, Tempe, AZ 85287 USA	Arizona State University; Arizona State University-Tempe; Arizona State University; Arizona State University-Tempe	Ladd, GW (corresponding author), Arizona State Univ, Dept Psychol, T Denny Sanford Sch Social & Family Dynam, POB 873701, Tempe, AZ 85287 USA.	Gary.Ladd@asu.edu		Ladd, Becky/0000-0002-7796-6474	National Institutes of Health [1 RO1MH-49223, 2-RO1MH-49223, R01HD-045906]	National Institutes of Health(United States Department of Health & Human ServicesNational Institutes of Health (NIH) - USA)	This investigation was conducted as part of the Pathways Project, a larger longitudinal investigation of children's social, psychological, and scholastic adjustment in school contexts that is supported by the National Institutes of Health (1 RO1MH-49223, 2-RO1MH-49223, R01HD-045906 to Gary W. Ladd). Special appreciation is expressed to all the children and parents who made this study possible, an…		56	170	210	4	59	AMER PSYCHOLOGICAL ASSOC	WASHINGTON	750 FIRST ST NE, WASHINGTON, DC 20002-4242 USA	0022-0663	1939-2176		J EDUC PSYCHOL	J. Educ. Psychol.	AUG	2017	109	6
J	Graham, S; Bellmore, AD; Mize, J				Graham, Sandra; Bellmore, Amy D.; Mize, Jennifer			Peer victimization, aggression, and their co-occurrence in middle school: Pathways to adjustment problems	JOURNAL OF ABNORMAL CHILD PSYCHOLOGY			English	Article						aggresive victim; academic achievement; victim; self-blame	SELF-BLAME; VICTIMS; ADOLESCENTS; DEPRESSION; HARASSMENT; STEREOTYPES; LONELINESS; COMPETENCE; VIOLENCE; BULLIES	An ethnically diverse sample of 6th-grade students completed peer nomination procedures that were used to create subgroups of students with reputations as victims, aggressors, aggressive victims, and socially adjusted (neither aggressive nor victimized). Self-report data on psychological adjustment, attributions for peer harassment, and perceived school climate were gathered. In addition, homeroo…	Univ Calif Los Angeles, Dept Educ, Los Angeles, CA 90095 USA; Univ Kansas, Lawrence, KS 66045 USA	University of California System; University of California Los Angeles; University of Kansas	Graham, S (corresponding author), Univ Calif Los Angeles, Dept Educ, Los Angeles, CA 90095 USA.	shgraham@ucla.edu							59	169	260	3	44	SPRINGER/PLENUM PUBLISHERS	NEW YORK	233 SPRING ST, NEW YORK, NY 10013 USA	0091-0627	1573-2835		J ABNORM CHILD PSYCH	J. Abnorm. Child Psychol.	JUN	2006	34	3
J	Datu, JAD; Valdez, JPM; King, RB				Datu, Jesus Alfonso D.; Valdez, Jana Patricia M.; King, Ronnel B.			Perseverance Counts but Consistency Does Not! Validating the Short Grit Scale in a Collectivist Setting	CURRENT PSYCHOLOGY			English	Article						Academic engagement; Filipino students; Grit; Subjective well-being	SOCIAL GOALS; FACTORIAL INVARIANCE; FIT INDEXES; SELF; CULTURE; VALIDITY; STUDENTS; PASSION; SCHOOL	The present research aims to validate the Short Grit Scale (Duckworth et al. Journal of Personality Assessment 91:166-174, 2009) among a sample of university (n = 220) and high school students (n = 606) from a collectivist culture (i.e., the Philippines) using both within-network and between-network approaches to construct validation. Our results revealed interesting cross-cultural differences in…	[Datu, Jesus Alfonso D.] Univ Hong Kong, Fac Educ, Div Learning Dev & Divers, Pok Fu Lam, Hong Kong, Peoples R China; [Valdez, Jana Patricia M.] De La Salle Univ, Manila 1004, Philippines; [King, Ronnel B.] Hong Kong Inst Educ, Dept Curriculum & Instruct, Tai Po, Hong Kong, Peoples R China	University of Hong Kong; De La Salle University; Education University of Hong Kong (EdUHK)	Datu, JAD (corresponding author), Univ Hong Kong, Fac Educ, Div Learning Dev & Divers, Pok Fu Lam, Hong Kong, Peoples R China.	jess.datu@yahoo.com	King, Ronnel B/AGZ-0675-2022; Valdez, Jana Patricia Millonado/HRC-9854-2023	King, Ronnel B/0000-0003-1723-1748; Valdez, Jana Patricia Millonado/0000-0002-1237-2237; KING, Ronnel Bornasal/0000-0002-0648-8508; Datu, Jesus Alfonso/0000-0002-8790-1113					39	169	203	1	86	SPRINGER	NEW YORK	ONE NEW YORK PLAZA, SUITE 4600, NEW YORK, NY, UNITED STATES	1046-1310	1936-4733		CURR PSYCHOL	Curr. Psychol.	MAR	2016	35	1
J	Bodovski, K; Farkas, G				Bodovski, Katerina; Farkas, George			Mathematics growth in early elementary school: The roles of beginning knowledge, student engagement, and instruction	ELEMENTARY SCHOOL JOURNAL			English	Article; Proceedings Paper	Annual Meeting of the American-Educational-Research-Association	APR 07-11, 2006	San Francisco, CA	Amer Educ Res Assoc,Inst Educ Sci,US Dept Educ			LEARNING-DIFFICULTIES; NUMBER SENSE; CHILDREN; ACHIEVEMENT; DISABILITY; RISK; PERFORMANCE; RESILIENCE; ETHNICITY; OUTCOMES	We used the Early Childhood Longitudinal Study-Kindergarten Cohort (ECLS-K) data to examine how important mathematics readiness levels are to subsequent achievement growth and the efficacy of instruction and engagement in producing such growth. The ECLS-K selected a nationally representative sample of kinder-gartners in fall 1998 and is following these children through the end of eighth grade. We…	Penn State Univ, University Pk, PA 16802 USA	Pennsylvania Commonwealth System of Higher Education (PCSHE); Pennsylvania State University; Pennsylvania State University - University Park	Bodovski, K (corresponding author), Penn State Univ, University Pk, PA 16802 USA.		Hoffman, Shannah K/B-4104-2012	Bodovski, Katerina/0000-0003-1997-5214					54	166	273	1	35	UNIV CHICAGO PRESS	CHICAGO	1427 E 60TH ST, CHICAGO, IL 60637-2954 USA	0013-5984			ELEM SCHOOL J	Elem. Sch. J.	NOV	2007	108	2
J	Schwartz, D; Gorman, AH; Nakamoto, J; McKay, T				Schwartz, David; Gorman, Andrea Hopmeyer; Nakamoto, Jonathan; McKay, Tara			Popularity, social acceptance, and aggression in adolescent peer groups: Links with academic performance and school attendance	DEVELOPMENTAL PSYCHOLOGY			English	Article						popularity; aggression; social acceptance; academic achievement	MIDDLE SCHOOL; RELATIONAL AGGRESSION; PERCEIVED POPULARITY; SOCIOMETRIC STATUS; BEHAVIOR; ACHIEVEMENT; PERCEPTIONS; ADJUSTMENT; FRIENDS; SOCIALIZATION	This article reports a short-term longitudinal study focusing on popularity and social acceptance as predictors of academic engagement for a sample of 342 adolescents (approximate average age of 14). These youths were followed for 4 consecutive semesters. Popularity, social acceptance, and aggression were assessed with a peer nomination inventory, and data on academic engagement were obtained fro…	Univ So Calif, Dept Psychol, Los Angeles, CA 90089 USA	University of Southern California	Schwartz, D (corresponding author), Univ So Calif, Dept Psychol, 501 Seely G Muud, Los Angeles, CA 90089 USA.		McKay, Tara/AAR-9222-2020	Nakamoto, Jonathan/0000-0002-9222-0849; McKay, Tara/0000-0001-5076-6483					78	163	237	3	72	AMER PSYCHOLOGICAL ASSOC	WASHINGTON	750 FIRST ST NE, WASHINGTON, DC 20002-4242 USA	0012-1649	1939-0599		DEV PSYCHOL	Dev. Psychol.	NOV	2006	42	6
J	Smalls, C; White, R; Chavous, T; Sellers, R				Smalls, Ciara; White, Rhonda; Chavous, Tabbye; Sellers, Robert			Racial ideological beliefs and racial discrimination experiences as predictors of academic engagement among African American adolescents	JOURNAL OF BLACK PSYCHOLOGY			English	Article						academic engagement; racial identity; racial attitudes; discrimination; adolescents	GENDER-DIFFERENCES; SCHOOL ADJUSTMENT; ASIAN-AMERICAN; BLACK-STUDENTS; SELF-ESTEEM; IDENTITY; ACHIEVEMENT; IDENTIFICATION; PERCEPTIONS; MOTIVATION	Adolescents' understandings of their social identities and related personal experiences influence their adaptations and responses within domains in which those identities are salient. The authors explore associations of racial identity beliefs regarding how Blacks should act, think, and behave (racial ideologies) and racial discrimination experiences with academic engagement outcomes among 390 Af…	Univ Michigan, Ann Arbor, MI 48109 USA	University of Michigan System; University of Michigan	Smalls, C (corresponding author), Univ Michigan, Ann Arbor, MI 48109 USA.								91	161	326	1	32	SAGE PUBLICATIONS INC	THOUSAND OAKS	2455 TELLER RD, THOUSAND OAKS, CA 91320 USA	0095-7984	1552-4558		J BLACK PSYCHOL	J. Black Psychol.	AUG	2007	33	3
J	Rudolph, KD; Lambert, SF; Clark, AG; Kurlakowsky, KD				Rudolph, KD; Lambert, SF; Clark, AG; Kurlakowsky, KD			Negotiating the transition to middle school: The role of self-regulatory processes	CHILD DEVELOPMENT			English	Article							JUNIOR-HIGH-SCHOOL; ADOLESCENTS PERCEPTIONS; PSYCHOLOGICAL SYMPTOMATOLOGY; INDIVIDUAL-DIFFERENCES; GENDER-DIFFERENCES; DEPRESSION; STRESS; ESTEEM; COMPETENCE; CHILDHOOD	The present research examined the role of maladaptive self-regulatory beliefs as vulnerability factors for academic and emotional difficulties during the transition to middle school. A short term longitudinal design was employed to follow two groups of early adolescents: 187 adolescents who experienced a school transition between the fifth and sixth grades, and 142 adolescents who did not experie…	Univ Illinois, Dept Psychol, Champaign, IL 61820 USA	University of Illinois System; University of Illinois Urbana-Champaign	Univ Illinois, Dept Psychol, 603 E Daniel St, Champaign, IL 61820 USA.	krudolph@uiuc.edu			NIMH NIH HHS [MH 56327-01] Funding Source: Medline	NIMH NIH HHS(United States Department of Health & Human ServicesNational Institutes of Health (NIH) - USANIH National Institute of Mental Health (NIMH))			71	157	279	0	30	WILEY	HOBOKEN	111 RIVER ST, HOBOKEN 07030-5774, NJ USA	0009-3920	1467-8624		CHILD DEV	Child Dev.	MAY-JUN	2001	72	3
J	Horstmanshof, L; Zimitat, C				Horstmanshof, Louise; Zimitat, Craig			Future time orientation predicts academic engagement among first-year university students	BRITISH JOURNAL OF EDUCATIONAL PSYCHOLOGY			English	Article							PERSPECTIVE	Background. Enhancing student engagement is considered an important strategy for improving retention. Students' Time Perspective is an under-researched factor that may significantly influence student engagement. Aims. This study examines interrelationships between elements of student engagement and relationship with Time Perspective. We propose that there are significant relationships between psy…	Griffith Univ, Grifith Inst Higher Educ, Brisbane, Qld 4111, Australia	Griffith University	Zimitat, C (corresponding author), Univ Tasmania, Ctr Adv Learning & Teaching, Launceston, Tas 7250, Australia.	craig.zimitat@utas.edu.au	zhang, joseph/H-1070-2011; Zimitat, Craig/B-1759-2008; Horstmanshof, Louise/A-8664-2018	Zimitat, Craig/0000-0002-9073-095X; Horstmanshof, Louise/0000-0002-0749-1231					32	153	242	3	76	WILEY	HOBOKEN	111 RIVER ST, HOBOKEN 07030-5774, NJ USA	0007-0998	2044-8279		BRIT J EDUC PSYCHOL	Br. J. Educ. Psychol.	SEP	2007	77		3
J	Suárez-Orozco, C; Gaytán, FX; Bang, HJ; Pakes, J; O'Connor, E; Rhodes, J				Suarez-Orozco, Carola; Gaytan, Francisco X.; Bang, Hee Jin; Pakes, Juliana; O'Connor, Erin; Rhodes, Jean			Academic Trajectories of Newcomer Immigrant Youth	DEVELOPMENTAL PSYCHOLOGY			English	Article						immigrants; adolescence; academic trajectories; mixed methods	HIGH-SCHOOL; MIDDLE SCHOOL; FAMILY-STRUCTURE; ACHIEVEMENT; ENGAGEMENT; ADOLESCENTS; TRANSITION; RISK; MOBILITY; CONTEXT	Immigration to the United States presents both challenges and opportunities that affect students' academic achievement. Using a 5-year longitudinal, mixed-methods approach, we identified varying academic trajectories of newcomer immigrant students from Central America, China, the Dominican Republic, Haiti, and Mexico. Latent class growth curve analysis revealed that although some newcomer student…	[Suarez-Orozco, Carola] NYU, Dept Appl Psychol, New York, NY 10003 USA; [Suarez-Orozco, Carola] Inst Adv Study, Princeton, NJ 08540 USA; [Gaytan, Francisco X.] NE Illinois Univ, Social Work Program, Chicago, IL 60625 USA; [Bang, Hee Jin] William T Grant Fdn, New York, NY USA; [Pakes, Juliana] Harvard Univ, Ctr Amer Polit Studies, Cambridge, MA 02138 USA; [O'Connor, Erin] NYU, Dept Teaching & Lear…	New York University; Institute for Advanced Study - USA; Northeastern Illinois University; Harvard University; New York University; University of Massachusetts System; University of Massachusetts Boston	Suárez-Orozco, C (corresponding author), NYU, Dept Appl Psychol, 246 Greene St, New York, NY 10003 USA.	cso2@nyu.edu							95	153	291	2	63	AMER PSYCHOLOGICAL ASSOC	WASHINGTON	750 FIRST ST NE, WASHINGTON, DC 20002-4242 USA	0012-1649	1939-0599		DEV PSYCHOL	Dev. Psychol.	MAY	2010	46	3
J	Valeski, TN; Stipek, DJ				Valeski, TN; Stipek, DJ			Young children's feelings about school	CHILD DEVELOPMENT			English	Article							ACADEMIC SELF-CONCEPT; ELEMENTARY-SCHOOL; GENDER-DIFFERENCES; ACHIEVEMENT; COMPETENCE; KINDERGARTEN; PERCEPTIONS; ATTAINMENT; ENGAGEMENT; ADJUSTMENT	This study examined factors associated with young children's feelings about school in kindergarten and first grade, using a new measure, the Feelings about School (FAS). The FAS measures children's perceptions of academic competence, their feelings about the teacher, and their general attitudes toward school. Findings provided support for the reliability and validity of the FAS for kindergartners…											45	147	247	1	20	WILEY-BLACKWELL	MALDEN	COMMERCE PLACE, 350 MAIN ST, MALDEN 02148, MA USA	0009-3920			CHILD DEV	Child Dev.	JUL-AUG	2001	72	4
J	Yip, T; Wang, YJ; Mootoo, C; Mirpuri, S				Yip, Tiffany; Wang, Yijie; Mootoo, Candace; Mirpuri, Sheena			Moderating the Association Between Discrimination and Adjustment: A Meta-Analysis of Ethnic/Racial Identity	DEVELOPMENTAL PSYCHOLOGY			English	Article						ethnic/racial identity; ethnic/racial discrimination; adjustment outcomes; meta-analysis; ethnicity/race	PERCEIVED RACIAL-DISCRIMINATION; COLLECTIVE SELF-ESTEEM; AFRICAN-AMERICAN ADOLESCENTS; OTHER-GROUP ORIENTATION; LATINO ETHNIC-IDENTITY; RACIAL/ETHNIC DISCRIMINATION; MULTIDIMENSIONAL INVENTORY; PSYCHOLOGICAL DISTRESS; ACADEMIC ENGAGEMENT; PROTECTIVE FACTORS	The detrimental effects of discrimination are well documented; however, the influence of ethnic/racial identity (ERI) on this association is equivocal. There is theoretical and empirical support for both protective and detrimental effects of ERI. This meta-analysis includes 53 effect sizes from 51 studies and 18,545 participants spanning early adolescence to adulthood to synthesize the interactio…	[Yip, Tiffany; Mootoo, Candace] Fordham Univ, Dept Psychol, 226 Dealy Hall,441 East Fordham Rd, Bronx, NY 10458 USA; [Wang, Yijie] Michigan State Univ, Human Dev & Family Studies, E Lansing, MI 48824 USA; [Mirpuri, Sheena] Univ Hong Kong, Fac Educ, Hong Kong, Peoples R China; [Mirpuri, Sheena] Mem Sloan Kettering Canc Ctr, 1275 York Ave, New York, NY 10021 USA	Fordham University; Michigan State University; University of Hong Kong; Memorial Sloan Kettering Cancer Center	Yip, T (corresponding author), Fordham Univ, Dept Psychol, 226 Dealy Hall,441 East Fordham Rd, Bronx, NY 10458 USA.	tyip@fordham.edu	Wang, Yijie/AFS-0045-2022	yip, tiffany/0000-0001-7488-533X					165	147	190	5	69	AMER PSYCHOLOGICAL ASSOC	WASHINGTON	750 FIRST ST NE, WASHINGTON, DC 20002-4242 USA	0012-1649	1939-0599		DEV PSYCHOL	Dev. Psychol.	JUN	2019	55	6
J	Hospel, V; Galand, B				Hospel, Virginie; Galand, Benoit			Are both classroom autonomy support and structure equally important for students' engagement? A multilevel analysis	LEARNING AND INSTRUCTION			English	Article						Classroom learning environment; Structure; Autonomy support; Engagement; Multilevel analyses	SELF-DETERMINATION-THEORY; ACADEMIC ENGAGEMENT; SCHOOL ENGAGEMENT; MOTIVATION; TEACHER; CONTEXT; INSTRUCTION; ACHIEVEMENT; PERCEPTIONS; MANAGEMENT	The current study was carried out within the framework of self-determination theory and aimed to investigate specific, additive and combined effects of teachers' autonomy support and structure on students' engagement. Using multilevel analyses, main effects and interaction of autonomy support and structure provided at the classroom level were tested on behavioral, cognitive and emotional engageme…	[Hospel, Virginie; Galand, Benoit] Catholic Univ Louvain, Psychol Sci Res Inst IPSY, B-1348 Louvain La Neuve, Belgium; [Hospel, Virginie] Natl Fund Sci Res FRS FNRS Federat Wallonie Bruxe, Brussels, Belgium	Universite Catholique Louvain	Hospel, V (corresponding author), Catholic Univ Louvain, Psychol Sci Res Inst IPSY, Pl Cardinal Mercier,10 Bte L3-05-01, B-1348 Louvain La Neuve, Belgium.	virginie.hospel@uclouvain.be; benoit.galand@uclouvain.be		Galand, Benoit/0000-0003-3387-4305	National Fund for Scientific Research (F.R.S.-FNRS) of Federation Wallonie-Bruxelles	National Fund for Scientific Research (F.R.S.-FNRS) of Federation Wallonie-Bruxelles(Fonds de la Recherche Scientifique - FNRS)	The authors wish to thank Noemie Baudoin, Arnaud Marechal, and Sandra Robinet for their help in the data collection, and the three anonymous reviewers for their helpful comments. This research was supported by a grant of the National Fund for Scientific Research (F.R.S.-FNRS) of the Federation Wallonie-Bruxelles awarded to the first author.		48	143	158	13	146	PERGAMON-ELSEVIER SCIENCE LTD	OXFORD	THE BOULEVARD, LANGFORD LANE, KIDLINGTON, OXFORD OX5 1GB, ENGLAND	0959-4752	1873-3263		LEARN INSTR	Learn Instr.	FEB	2016	41
J	Pietarinen, J; Soini, T; Pyhälto, K				Pietarinen, Janne; Soini, Tiina; Pyhalto, Kirsi			Students' emotional and cognitive engagement as the determinants of well-being and achievement in school	INTERNATIONAL JOURNAL OF EDUCATIONAL RESEARCH			English	Article						Emotional and cognitive engagement; Subjective well-being; Learning outcomes	CLASSROOM SOCIAL-ENVIRONMENT; ACADEMIC ENGAGEMENT; ADOLESCENTS PERCEPTIONS; WORK ENGAGEMENT; MIDDLE SCHOOL; MOTIVATION; TRAJECTORIES; ELEMENTARY; BURNOUT; SELF	This study aims to gain a better understanding of the interrelation between students' emotional and cognitive engagement that is mediated by experienced well-being in school. The main hypothesis was that perceived emotional engagement constructed in the peer group and in teacher-student interaction together with school-related well-being contributes to students' perceived cognitive engagement and…	[Pietarinen, Janne] Univ Eastern Finland, Sch Appl Educ Sci & Teacher Educ, Joensuu, Finland; [Soini, Tiina] Univ Tampere, Sch Educ, FI-33014 Tampere, Finland; [Pyhalto, Kirsi] Univ Helsinki, Ctr Res & Dev Higher Educ, Inst Behav Sci, FIN-00014 Helsinki, Finland	University of Eastern Finland; Tampere University; University of Helsinki	Pietarinen, J (corresponding author), Univ Eastern Finland, Sch Appl Educ Sci & Teacher Educ, Yliopistokatu 2,POB 111, Joensuu, Finland.	janne.pietarinen@uef.fi; tiina.soini@uta.fi; kirsi.pyhalto@helsinki.fi		Pyhalto, Kirsi/0000-0002-8766-0559; Soini, Tiina/0000-0002-0637-8931	Ministry of Education and Culture	Ministry of Education and Culture	This research is funded by the Ministry of Education and Culture.		87	142	189	7	89	ELSEVIER SCI LTD	OXFORD	THE BOULEVARD, LANGFORD LANE, KIDLINGTON, OXFORD OX5 1GB, OXON, ENGLAND	0883-0355			INT J EDUC RES	Int. J. Educ. Res.		2014	67
J	Wang, MT; Huguley, JP				Wang, Ming-Te; Huguley, James P.			Parental Racial Socialization as a Moderator of the Effects of Racial Discrimination on Educational Success Among African American Adolescents	CHILD DEVELOPMENT			English	Article							ETHNIC SOCIALIZATION; SCHOOL ENGAGEMENT; ACADEMIC-ACHIEVEMENT; EXPERIENCES; PERCEPTIONS; IDENTITY; PATTERNS; CHILDREN; SUPPORT; MIDDLE	This study investigated whether parental racial socialization practices moderated the relation between racial discrimination in school and adolescents educational outcomes. Using data from a longitudinal study of an economically diverse sample of 630 African American adolescents (mean age = 14.5) from a major East Coast metropolis, the results revealed that cultural socialization attenuated the e…	[Wang, Ming-Te] Univ Pittsburgh, Pittsburgh, PA 15260 USA; [Huguley, James P.] Harvard Univ, Cambridge, MA 02138 USA	Pennsylvania Commonwealth System of Higher Education (PCSHE); University of Pittsburgh; Harvard University	Wang, MT (corresponding author), 5940 Posvar Hall,230 S Bouquet St, Pittsburgh, PA 15260 USA.	mtwang@pitt.edu	Wang, Ming-Te/HCH-2285-2022						64	139	231	1	36	WILEY	HOBOKEN	111 RIVER ST, HOBOKEN 07030-5774, NJ USA	0009-3920	1467-8624		CHILD DEV	Child Dev.	SEP-OCT	2012	83	5
J	de Bruyn, EH; Cillessen, AHN				de Bruyn, Eddy H.; Cillessen, Antonius H. N.			Popularity in early adolescence: Prosocial and antisocial subtypes	JOURNAL OF ADOLESCENT RESEARCH			English	Article						early adolescence; popularity; interpersonal functioning; academic engagement	PEER POPULARITY; AGGRESSIVE DIMENSIONS; PERCEIVED POPULARITY; SOCIAL-STATUS; SCHOOL BOYS; DOMINANCE; GIRLS; CONFIGURATIONS; ATTRACTIVENESS; HETEROGENEITY	The present study was designed to examine early adolescents' stereotypical descriptions of two types of youth who are seen as popular by their peers. Participants were 13- to 14-year-old early adolescents (N=287). The results indicated that early adolescents distinguished two types of popular peers: a populistic (popular but not necessarily well liked) type and a prosocial-popular (popular and we…	Univ Amsterdam, Dept Educ, NL-1012 WX Amsterdam, Netherlands; Univ Connecticut, Dept Psychol, Storrs, CT 06269 USA	University of Amsterdam; University of Connecticut	de Bruyn, EH (corresponding author), Univ Amsterdam, Dept Educ, NL-1012 WX Amsterdam, Netherlands.	edebruyn@fmg.uva.nl	Cillessen, Antonius H. N./A-5978-2010	Cillessen, Antonius H. N./0000-0002-5884-907X					37	138	181	1	40	SAGE PUBLICATIONS INC	THOUSAND OAKS	2455 TELLER RD, THOUSAND OAKS, CA 91320 USA	0743-5584	1552-6895		J ADOLESCENT RES	J. Adolesc. Res.	NOV	2006	21	6
J	Wilson, D; Jones, D; Bocell, F; Crawford, J; Kim, MJ; Veilleux, N; Floyd-Smith, T; Bates, R; Plett, M				Wilson, Denise; Jones, Diane; Bocell, Fraser; Crawford, Joy; Kim, Mee Joo; Veilleux, Nanette; Floyd-Smith, Tamara; Bates, Rebecca; Plett, Melani			Belonging and Academic Engagement Among Undergraduate STEM Students: A Multi-institutional Study	RESEARCH IN HIGHER EDUCATION			English	Article						STEM; Belonging; Engagement; Self-efficacy	PSYCHOLOGICAL SENSE; SELF-EFFICACY; COLLEGE CLASSROOM; INVOLVEMENT; PARTICIPATION; TRANSITION; MULTIYEAR; COMMUNITY; VALIDITY; OUTCOMES	This study examined the links between multiple levels of belonging and forms of behavioral and emotional engagement among STEM undergraduates in five geographically and culturally distinct institutions in the United States. Data were gathered from a survey specifically designed to capture the links between these key elements of the undergraduate experience. Results from over 1500 student particip…	[Wilson, Denise] Univ Washington, Dept Elect Engn, Seattle, WA 98195 USA; [Jones, Diane; Bocell, Fraser; Crawford, Joy; Kim, Mee Joo] Univ Washington, Coll Educ, Seattle, WA 98195 USA; [Veilleux, Nanette] Dept Math Stat & Comp Sci, Boston, MA 02115 USA; [Floyd-Smith, Tamara] Tuskegee Univ, Dept Chem Engn, Tuskegee, AL 36088 USA; [Bates, Rebecca] Minnesota State Univ, Dept Comp Sci, Mankato, MN 56…	University of Washington; University of Washington Seattle; University of Washington; University of Washington Seattle; Tuskegee University; Minnesota State Colleges & Universities; Minnesota State University Mankato; Seattle Pacific University	Wilson, D (corresponding author), Univ Washington, Dept Elect Engn, Seattle, WA 98195 USA.	denisew@u.washington.edu		Bocell, Fraser/0000-0002-2943-2662; Kim, Mee Joo/0000-0002-2773-9011	National Science Foundation [DRL-0909817, 0910143, 0909659, 0909900, 0909850]; Division Of Research On Learning; Direct For Education and Human Resources [0910143, 0909900] Funding Source: National Science Foundation; Division Of Research On Learning; Direct For Education and Human Resources [0909850, 0909659] Funding Source: National Science Foundation	National Science Foundation(National Science Foundation (NSF)); Division Of Research On Learning; Direct For Education and Human Resources(National Science Foundation (NSF)NSF - Directorate for STEM Education (EDU)); Division Of Research On Learning; Direct For Education and Human Resources(National Science Foundation (NSF)NSF - Directorate for STEM Education (EDU))	The authors would like to gratefully acknowledge the National Science Foundation for their support of this work under the REESE program (Grant numbers DRL-0909817, 0910143, 0909659, 0909900, and 0909850). Any opinions, findings, and conclusions or recommendations expressed in this material are those of the author(s) and do not necessarily reflect the views of the National Science Foundation.		60	137	216	4	87	SPRINGER	NEW YORK	ONE NEW YORK PLAZA, SUITE 4600, NEW YORK, NY, UNITED STATES	0361-0365	1573-188X		RES HIGH EDUC	Res. High. Educ.	NOV	2015	56	7
J	Zimmer-Gembeck, MJ; Chipuer, HM; Hanisch, M; Creed, PA; McGregor, L				Zimmer-Gembeck, Melanie J.; Chipuer, Heather M.; Hanisch, Michelle; Creed, Peter A.; McGregor, Leanne			Relationships at school and stage-environment fit as resources for adolescent engagement and achievement	JOURNAL OF ADOLESCENCE			English	Article						school engagement; peer relationships; teacher-student relationships; achievement; stage-environment fit	SELF-DETERMINATION THEORY; MIDDLE SCHOOL; MOTIVATIONAL BELIEFS; ACADEMIC-ACHIEVEMENT; MISSING DATA; BEHAVIOR; PERCEPTIONS; ADJUSTMENT; NEED; SATISFACTION	Guided by Self-Determination and associated theories, we examined whether adolescent (N = 324, M age = 15, 52% female) competence (academic engagement and achievement) were supported by relationships at school and school fit. Aspects of relationships and school fit that were measured included adolescents' perceptions of each context as promoting autonomy, relatedness and competence. Within a late…	Griffith Univ, Sch Psychol, Nathan, Qld 9726, Australia	Griffith University	Zimmer-Gembeck, MJ (corresponding author), Griffith Univ, Sch Psychol, Gold Coast Campus,PMB 50 GCMC, Nathan, Qld 9726, Australia.	m.zimmer-gembeck@griffith.edu.au	Zimmer-Gembeck, Melanie/H-3031-2015	Zimmer-Gembeck, Melanie/0000-0001-9100-010X; Creed, Peter A/0000-0002-8671-501X					76	132	220	0	16	WILEY	HOBOKEN	111 RIVER ST, HOBOKEN 07030-5774, NJ USA	0140-1971	1095-9254		J ADOLESCENCE	J. Adolesc.	DEC	2006	29	6
J	Diez, T				Diez, Thomas			Normative power as hegemony	COOPERATION AND CONFLICT			English	Article						EU foreign policy; hegemony; normative power	EUROPEAN-UNION; DEMOCRACY PROMOTION; EXPECTATIONS GAP; COMMON FOREIGN; EU; POLICY; SECURITY; POLITICS; AFRICA; CHINA	This article identifies four key problems in the debate about normative power Europe that may be fruitfully tackled when linking it to the concept of hegemony: the debate about whether EU foreign and external policy is driven by norms or interests; the problem of inconsistent behaviour as a result of competing and contested norms; the question of the role of state and non-state actors in EU forei…	[Diez, Thomas] Univ Tubingen, DE-72074 Tubingen, Germany	Eberhard Karls University of Tubingen	Diez, T (corresponding author), Univ Tubingen, Dept Polit Sci, Melanchthonstr 36, DE-72074 Tubingen, Germany.	thomas.diez@uni-tuebingen.de	Diez, Thomas/AFJ-9323-2022	Diez, Thomas/0000-0001-8056-6693					81	129	141	3	98	SAGE PUBLICATIONS LTD	LONDON	1 OLIVERS YARD, 55 CITY ROAD, LONDON EC1Y 1SP, ENGLAND	0010-8367	1460-3691		COOP CONFL	Coop. Confl.	JUN	2013	48	2
J	Bryant, AN				Bryant, AN			Changes in attitudes toward women's roles: Predicting gender-role traditionalism among college students	SEX ROLES			English	Article						college students; attitudes; traditionalism	SEX-ROLE ATTITUDES; IMPACT; COURSES; RACE	National college student data derived from the 1996 Cooperative Institutional Research Program Freshman Survey and the 2000 College Student Survey were used to assess longitudinal changes in gender-role traditionalism across 4 years of college. Applying the Input-Environment-Outcome model to blocked stepwise regression analyses, the predictive value of students' precollege characteristics and pre…	Univ Calif Los Angeles, Grad Sch Educ & Informat Studies, Higher Educ Res Inst, Los Angeles, CA 90095 USA	University of California System; University of California Los Angeles	Bryant, AN (corresponding author), Univ Calif Los Angeles, Grad Sch Educ & Informat Studies, Higher Educ Res Inst, 3005 Moore Hall,Mailbox 951521, Los Angeles, CA 90095 USA.								30	128	184	1	26	KLUWER ACADEMIC/PLENUM PUBL	NEW YORK	233 SPRING ST, NEW YORK, NY 10013 USA	0360-0025			SEX ROLES	Sex Roles	FEB	2003	48	3-4
J	Soria, KM; Stebleton, MJ				Soria, Krista M.; Stebleton, Michael J.			First-generation students' academic engagement and retention	TEACHING IN HIGHER EDUCATION			English	Article						first-generation students; academic engagement; retention; public universities	2ND-GENERATION COLLEGE-STUDENTS; FACULTY INTERACTION; HIGHER-EDUCATION; ASPIRATIONS; EXPERIENCES; ATTRITION	This study investigates differences in academic engagement and retention between first-generation and non-first-generation undergraduate students. Utilizing the Student Experience in the Research University survey of 1864 first-year students at a large, public research university located in the United States, this study finds that first-generation students have lower academic engagement (as measu…	[Soria, Krista M.] Univ Minnesota Twin Cities, Off Inst Res, Minneapolis, MN 55455 USA; [Stebleton, Michael J.] Univ Minnesota Twin Cities, Coll Educ & Human Dev, Dept Postsecondary Teaching & Learning, Minneapolis, MN 55455 USA	University of Minnesota System; University of Minnesota Twin Cities; University of Minnesota System; University of Minnesota Twin Cities	Soria, KM (corresponding author), Univ Minnesota Twin Cities, Off Inst Res, 272-6 McNamara Alumni Ctr,200 Oak St SE, Minneapolis, MN 55455 USA.	ksoria@umn.edu	Soria, Krista/ABD-6638-2021	Soria, Krista/0000-0002-2679-6700					50	128	455	7	142	ROUTLEDGE JOURNALS, TAYLOR & FRANCIS LTD	ABINGDON	4 PARK SQUARE, MILTON PARK, ABINGDON OX14 4RN, OXFORDSHIRE, ENGLAND	1356-2517			TEACH HIGH EDUC	Teach. High Educ.		2012	17	6
J	Wentzel, KK; Watkins, DE				Wentzel, KK; Watkins, DE			Peer relationships and collaborative learning as contexts for academic enablers	SCHOOL PSYCHOLOGY REVIEW			English	Article							INTERPERSONAL RELATIONSHIPS; STUDENT ABILITY; SOCIAL SUPPORT; MOTIVATION; CLASSROOM; ACHIEVEMENT; ACCEPTANCE; ADJUSTMENT; CHILDREN; BEHAVIOR	In this article it is argued that peers have the potential to provide contexts for learning that can have a profound impact on the development of students' academic enablers. Based on work on social support and belongingness, ways in which being accepted by peers can motivate students to engage in learning activities and to display socially appropriate forms of behavior are discussed. Using a Vyg…	Univ Maryland, College Pk, MD 20742 USA; York Coll Penn, York, PA USA	University System of Maryland; University of Maryland College Park; York College Pennsylvania	Univ Maryland, 3304 Benjamin Bldg, College Pk, MD 20742 USA.	wentzel@wam.umd.edu							61	126	210	0	34	TAYLOR & FRANCIS INC	PHILADELPHIA	530 WALNUT STREET, STE 850, PHILADELPHIA, PA 19106 USA		2372-966X		SCHOOL PSYCHOL REV	Sch. Psychol. Rev.		2002	31	3
J	Johnson, W; Mcgue, M; Iacono, WG				Johnson, Wendy; McGue, Matt; Iacono, William G.			Genetic and environmental influences on academic achievement trajectories during adolescence	DEVELOPMENTAL PSYCHOLOGY			English	Article						genetic and environmental influences; school achievement; longitudinal twin study; achievement trajectories; covariates of achievement	DISRUPTIVE BEHAVIOR; MULTIPLE RISK; SCHOOL; PERSONALITY; PARENT; INTELLIGENCE; DISORDERS; CHILDHOOD; CHILDREN; ADJUSTMENT	Most studies have considered the effects of particular characteristics on academic achievement individually, which means that little is known about how they function together. Using the population-based Minnesota Twin Family Study, the authors investigated the effects of child academic engagement (interest, involvement, effort), IQ, depression, externalizing behavior, and family environmental ris…	Univ Minnesota, Dept Psychol, Minneapolis, MN 55455 USA	University of Minnesota System; University of Minnesota Twin Cities	Johnson, W (corresponding author), Univ Minnesota, Dept Psychol, 75 E River Rd, Minneapolis, MN 55455 USA.	john4350@tc.umn.edu							74	125	158	3	52	AMER PSYCHOLOGICAL ASSOC	WASHINGTON	750 FIRST ST NE, WASHINGTON, DC 20002-4242 USA	0012-1649	1939-0599		DEV PSYCHOL	Dev. Psychol.	MAY	2006	42	3
J	Mount, M; Martinez, MG				Mount, Matthew; Martinez, Marian Garcia			Social Media: A TOOL FOR OPEN INNOVATION	CALIFORNIA MANAGEMENT REVIEW			English	Article						Social Media; Open Innovation; Ideation; R&D; Commercialization	OPEN SOURCE SOFTWARE; FUZZY FRONT-END; AMBIDEXTROUS ORGANIZATIONS; INFORMATION-TECHNOLOGY; KNOWLEDGE REUSE; USER; IMPLEMENTATION; COLLABORATION; ANTECEDENTS; COMMUNITIES	Despite the exponential rise of social media use in external stakeholder engagement academic research and managerial practice have paid little attention to how it can be used for open innovation across the entire innovation funnel, spanning ideation, R&D, and commercialization. As a result there is little understanding of how companies can organize for and implement social media for open innovati…	[Mount, Matthew; Martinez, Marian Garcia] Univ Kent, Kent Business Sch, Canterbury, Kent, England	University of Kent	Mount, M (corresponding author), Univ Kent, Kent Business Sch, Canterbury, Kent, England.		Barretta, Paul/G-4383-2016	Barretta, Paul/0000-0002-6940-587X; Mount, Matthew/0000-0002-6470-7502					78	124	153	5	180	SAGE PUBLICATIONS INC	THOUSAND OAKS	2455 TELLER RD, THOUSAND OAKS, CA 91320 USA	0008-1256	2162-8564		CALIF MANAGE REV	Calif. Manage. Rev.	SUM	2014	56	4
J	Wefald, AJ; Downey, RG				Wefald, Andrew J.; Downey, Ronald G.			Construct Dimensionality of Engagement and its Relation With Satisfaction	JOURNAL OF PSYCHOLOGY			English	Article						construct dimensionality; construct overlap; engagement; satisfaction	JOB-SATISFACTION; POSITIVE AFFECT; ITEM REVERSALS; INVOLVEMENT; PERFORMANCE; VALIDITY	Engagement-a persistent and positive affective-motivational state of fulfillment characterized by vigor, dedication, and absorption (W. B. Schaufeli, M. Salanova, V. Gonzalez-Rotna, & A. B. Bakker, 2002)-has become a popular subject among academic and industry researchers. Following suggestions in the recent literature calling for further examination of the underlying factors comprising the const…	[Downey, Ronald G.] Kansas State Univ, Dept Psychol, Manhattan, KS 66502 USA	Kansas State University	Wefald, AJ (corresponding author), Kansas State Univ, Sch Leadership Studies, 918 N Manhattan Ave, Manhattan, KS 66502 USA.	wefald@ksu.edu							36	123	205	5	45	ROUTLEDGE JOURNALS, TAYLOR & FRANCIS LTD	ABINGDON	2-4 PARK SQUARE, MILTON PARK, ABINGDON OX14 4RN, OXON, ENGLAND	0022-3980	1940-1019		J PSYCHOL	J. Psychol.	JAN	2009	143	1
J	Kalar, B; Antoncic, B				Kalar, Barbara; Antoncic, Bostjan			The entrepreneurial university, academic activities and technology and knowledge transfer in four European countries	TECHNOVATION			English	Article						Entrepreneurial university; Technology and knowledge transfer; Entrepreneurially oriented university department; Entrepreneurial academic activities; Traditional academic activities; Cross-cultural study	TESTING MEASUREMENT INVARIANCE; INDUSTRY KNOWLEDGE; WORK-ENVIRONMENT; COMMERCIALIZATION; SCIENTISTS; ORIENTATION; PERFORMANCE; INVENTION; SCIENCE; IMPACT	This paper aims to provide an insight into academics' perceptions of an entrepreneurial university. In spite of all the initiatives, environmental changes and desire to create entrepreneurial universities, there is limited research on how the entrepreneurial orientation within a university may influence academics' engagement in different activities. Based on analyzing academics' survey responses …	[Kalar, Barbara; Antoncic, Bostjan] Univ Ljubljana, Fac Econ, Ljubljana, Slovenia	University of Ljubljana	Antoncic, B (corresponding author), Univ Ljubljana, Fac Econ, Ljubljana, Slovenia.	barbara.kalar@gmail.com; b.antoncic@gmail.com	Kalar, Barbara/JGL-9139-2023; Antoncic, Bostjan/H-4223-2011	Antoncic, Bostjan/0000-0003-1030-6567					70	120	141	3	173	ELSEVIER	AMSTERDAM	RADARWEG 29, 1043 NX AMSTERDAM, NETHERLANDS	0166-4972	1879-2383		TECHNOVATION	Technovation	FEB-MAR	2015	36-37
J	LEE, VE; SMITH, JB				LEE, VE; SMITH, JB			EFFECTS OF SCHOOL RESTRUCTURING ON THE ACHIEVEMENT AND ENGAGEMENT OF MIDDLE-GRADE STUDENTS	SOCIOLOGY OF EDUCATION			English	Article							SOCIAL DISTRIBUTION; INSTRUCTION; TRACKING; TEACHERS; EFFICACY	This article reports on a study of the impact of attending restructured schools on the achievement and engagement of young adolescents. It places the movement toward restructuring in a conceptual framework favoring the development of more communally organized schools and away from the largely bureaucratic organization of most American schools. Using a subsample of 8,845 eighth graders in 377 publ…	UNIV ROCHESTER, DEPT ADM & SCH ORG, GRAD SCH EDUC & HUMAN DEV, ROCHESTER, NY 14627 USA; UNIV WISCONSIN, CTR ORG & RESTRUCTURING SCH, MADISON, WI 53706 USA	University of Rochester; University of Wisconsin System; University of Wisconsin Madison	UNIV MICHIGAN, SCH EDUC, DEPT EDUC STUDIES, ANN ARBOR, MI 48109 USA.								62	118	256	0	16	SAGE PUBLICATIONS INC	THOUSAND OAKS	2455 TELLER RD, THOUSAND OAKS, CA 91320 USA	0038-0407	1939-8573		SOCIOL EDUC	Sociol. Educ.	JUL	1993	66	3
J	Liu, RD; Zhen, R; Ding, Y; Liu, Y; Wang, J; Jiang, RH; Xu, L				Liu, Ru-De; Zhen, Rui; Ding, Yi; Liu, Ying; Wang, Jia; Jiang, Ronghuan; Xu, Le			Teacher support and math engagement: roles of academic self-efficacy and positive emotions	EDUCATIONAL PSYCHOLOGY			English	Article						Teacher support; academic self-efficacy; enjoyment; relief; math engagement	CLASSROOM SOCIAL-ENVIRONMENT; SCHOOL ENGAGEMENT; EARLY ADOLESCENTS; MIDDLE SCHOOL; COGNITIVE ENGAGEMENT; STUDENT ENGAGEMENT; ACHIEVEMENT; MOTIVATION; SPECIFICITY; PERCEPTIONS	The current study assessed 869 elementary school students in China using self-report questionnaires, to examine the multiple mediating effects of academic self-efficacy and positive academic emotions (enjoyment and relief) in the relations between teacher support and academic engagement (cognitive, behavioural and emotional aspects) within a math class. The results indicated that teacher support …	[Liu, Ru-De; Zhen, Rui; Liu, Ying; Wang, Jia; Jiang, Ronghuan; Xu, Le] Beijing Normal Univ, Beijing Key Lab Appl Expt Psychol, Inst Dev Psychol, Fac Psychol, Beijing, Peoples R China; [Ding, Yi] Fordham Univ, Grad Sch Educ, New York, NY 10023 USA	Beijing Normal University; Fordham University	Zhen, R (corresponding author), Beijing Normal Univ, Beijing Key Lab Appl Expt Psychol, Inst Dev Psychol, Fac Psychol, Beijing, Peoples R China.	zhenrui1206@126.com	D, Y/JJC-2699-2023		Project of Humanities and Social Sciences Key Research Base in Ministry of Education of the People's Republic of China [15JJD190001]	Project of Humanities and Social Sciences Key Research Base in Ministry of Education of the People's Republic of China	This study was supported by the Project of Humanities and Social Sciences Key Research Base in Ministry of Education of the People's Republic of China [grant number 15JJD190001].		61	117	132	26	217	ROUTLEDGE JOURNALS, TAYLOR & FRANCIS LTD	ABINGDON	2-4 PARK SQUARE, MILTON PARK, ABINGDON OX14 4RN, OXON, ENGLAND	0144-3410	1469-5820		EDUC PSYCHOL-UK	Educ. Psychol.		2018	38	1
J	March, RE; Horner, RH				March, RE; Horner, RH			Feasibility and contributions of functional behavioral assessment in schools	JOURNAL OF EMOTIONAL AND BEHAVIORAL DISORDERS			English	Article							DISRUPTIVE BEHAVIOR; INTERVENTION; STUDENTS; SUPPORT	Two types of analysis were used to examine the feasibility and utility of functional behavioral assessment (FBA) in a general education middle school. The authors used a descriptive analysis to assess whether a group-based behavior-support program was differentially effective based on the perceived consequences maintaining student problem behavior. Twenty-four middle school students were monitore…	Univ Oregon, Eugene, OR 97403 USA	University of Oregon	Univ Oregon, 1235, Eugene, OR 97403 USA.	rob.march@nyu.edu							43	111	206	0	6	SAGE PUBLICATIONS INC	THOUSAND OAKS	2455 TELLER RD, THOUSAND OAKS, CA 91320 USA	1063-4266	1538-4799		J EMOT BEHAV DISORD	J. Emot. Behav. Disord.	FAL	2002	10	3
J	Sun, JCY				Sun, Jerry Chih-Yuan			Influence of polling technologies on student engagement: An analysis of student motivation, academic performance, and brainwave data	COMPUTERS & EDUCATION			English	Article						Improving classroom teaching; Interactive learning environments; Teaching/learning strategies	AUDIENCE RESPONSE SYSTEMS; PARTICIPATION; BENEFITS; CLICKER	This study compared clicker technology against mobile polling and the Just-in-Time Teaching (JiTT) strategy to investigate how these methods may differently affect students' anxiety, self-efficacy, engagement, academic performance, and attention and relaxation as indicated by brainwave activity. The study utilized a quasi-experimental research design. To assess the differences between the effects…	Natl Chiao Tung Univ, Inst Educ, Hsinchu, Taiwan	National Yang Ming Chiao Tung University	Sun, JCY (corresponding author), Natl Chiao Tung Univ, Inst Educ, 1001 Ta Hsueh Rd, Hsinchu, Taiwan.	csun@nctu.edu.tw	Sun, Jerry Chih-Yuan/C-5255-2009	Sun, Jerry Chih-Yuan/0000-0002-7892-4313	National Science Council of the Republic of China [NSC 100-2511-S-009-012, NSC 101-2511-S-009-MY3]	National Science Council of the Republic of China(Ministry of Science and Technology, Taiwan)	This study is supported in part by the National Science Council of the Republic of China under contract numbers NSC 100-2511-S-009-012 and NSC 101-2511-S-009-MY3. The author would like to thank instructors and the students who participated in this study and acknowledge the contributions of Chao-Hsiu Chen, Chih-Chien Lin, and William Shao-Chin who supported this research study and provided valuabl…		36	110	131	2	109	PERGAMON-ELSEVIER SCIENCE LTD	OXFORD	THE BOULEVARD, LANGFORD LANE, KIDLINGTON, OXFORD OX5 1GB, ENGLAND	0360-1315	1873-782X		COMPUT EDUC	Comput. Educ.	MAR	2014	72
J	Rimm-Kaufman, SE; Baroody, AE; Larsen, RAA; Curby, TW; Abry, T				Rimm-Kaufman, Sara E.; Baroody, Alison E.; Larsen, Ross A. A.; Curby, Timothy W.; Abry, Tashia			To What Extent Do Teacher-Student Interaction Quality and Student Gender Contribute to Fifth Graders' Engagement in Mathematics Learning?	JOURNAL OF EDUCATIONAL PSYCHOLOGY			English	Article						engagement; teacher-student interactions; mathematics; classrooms; fifth grade	CLASSROOM EMOTIONAL CLIMATE; ACADEMIC ENGAGEMENT; SCHOOL ENGAGEMENT; BEHAVIORAL ENGAGEMENT; ELEMENTARY-SCHOOL; SELF-REGULATION; ACHIEVEMENT; KINDERGARTEN; RATINGS; MIDDLE	This study examines concurrent teacher-student interaction quality and 5th graders' (n = 387) engagement in mathematics classrooms (n = 63) and considers how teacher-student interaction quality relates to engagement differently for boys and girls. Three approaches were used to measure student engagement in mathematics: Research assistants observed engaged behavior, teachers reported on students' …	[Rimm-Kaufman, Sara E.] Univ Virginia, Curry Sch Educ, Charlottesville, VA 22904 USA; [Rimm-Kaufman, Sara E.] Univ Virginia, Ctr Adv Study Teaching & Learning, Charlottesville, VA 22904 USA; [Baroody, Alison E.] San Francisco State Univ, Dept Child & Adolescent Dev, San Francisco, CA USA; [Larsen, Ross A. A.] Virginia Commonwealth Univ, Dept Fdn Educ, Richmond, VA 23284 USA; [Curby, Timothy W.] G…	University of Virginia; University of Virginia; California State University System; San Francisco State University; Virginia Commonwealth University; George Mason University; Arizona State University; Arizona State University-Tempe	Rimm-Kaufman, SE (corresponding author), Univ Virginia, Curry Sch Educ, Ruffner Hall,Emmet St South, Charlottesville, VA 22904 USA.	serk@virginia.edu		Rimm-Kaufman, Sara/0000-0002-1354-8249; Curby, Timothy/0000-0001-8289-1748					80	109	201	16	148	AMER PSYCHOLOGICAL ASSOC	WASHINGTON	750 FIRST ST NE, WASHINGTON, DC 20002-4242 USA	0022-0663	1939-2176		J EDUC PSYCHOL	J. Educ. Psychol.	FEB	2015	107	1
J	Tartari, V; Perkmann, M; Salter, A				Tartari, Valentina; Perkmann, Markus; Salter, Ammon			In good company: The influence of peers on industry engagement by academic scientists	RESEARCH POLICY			English	Article						University-industry relations; Academic engagement; Commercialization; Scientists; Peer effects	KNOWLEDGE TRANSFER; UNIVERSITY RESEARCHERS; US UNIVERSITIES; SCIENCE; ENTREPRENEURS; FACULTY; STRATIFICATION; COMPETITION; TECHNOLOGY; INNOVATION	Previous research on academic entrepreneurship and engagement with industry has found that the behaviour of academics is influenced by their local social context. However, we know little about the mechanisms that produce this effect. We argue that academic scientists' industry engagement is influenced significantly by the behaviour of their peers, that is, the behaviour of colleagues of similar s…	[Tartari, Valentina] Copenhagen Business Sch, Dept Innovat & Org Econ, Copenhagen, Denmark; [Perkmann, Markus] Univ London Imperial Coll Sci Technol & Med, Sch Business, London SW7 2AZ, England; [Salter, Ammon] Univ Bath, Sch Management, Bath BA2 7AY, Avon, England	Copenhagen Business School; Imperial College London; University of Bath	Tartari, V (corresponding author), Copenhagen Business Sch, Dept Innovat & Org Econ, Copenhagen, Denmark.	vt.ino@cbs.dk	Tartari, Valentina/B-2599-2012; Tartari, Valentina/ABB-4882-2021; Salter, Ammon/A-9217-2010; Perkmann, Markus/F-1378-2010	Tartari, Valentina/0000-0001-7332-8590; Tartari, Valentina/0000-0001-7332-8590; Perkmann, Markus/0000-0001-7162-760X; Salter, Ammon/0000-0003-2065-1268	EPSRC [EP/F036930/1] Funding Source: UKRI; ESRC [ES/K001159/1, ES/G038082/1, ES/G042993/1] Funding Source: UKRI	EPSRC(UK Research & Innovation (UKRI)Engineering & Physical Sciences Research Council (EPSRC)); ESRC(UK Research & Innovation (UKRI)Economic & Social Research Council (ESRC))			97	107	113	8	128	ELSEVIER	AMSTERDAM	RADARWEG 29, 1043 NX AMSTERDAM, NETHERLANDS	0048-7333	1873-7625		RES POLICY	Res. Policy	SEP	2014	43	7
J	De Castella, K; Byrne, D; Covington, M				De Castella, Krista; Byrne, Don; Covington, Martin			Unmotivated or Motivated to Fail? A Cross-Cultural Study of Achievement Motivation, Fear of Failure, and Student Disengagement	JOURNAL OF EDUCATIONAL PSYCHOLOGY			English	Article						fear of failure; achievement; motivation; self-handicapping; defensive pessimism	PERFORMANCE-APPROACH GOALS; CLAIMED SELF-HANDICAPS; DEFENSIVE PESSIMISM; LEARNED HELPLESSNESS; ASIAN-AMERICAN; ACADEMIC-ACHIEVEMENT; AFFECTIVE RESPONSES; PERSONALITY-TRAITS; TEST ANXIETY; SUCCESS	A classic distinction in the literature on achievement and motivation is between fear of failure and success orientations. From the perspective of self-worth theory, these motives are not bipolar constructs but dimensions that interact in ways that make some students particularly vulnerable to underachievement and disengagement from school. The current study employs the quadripolar model of need …	[De Castella, Krista; Byrne, Don] Australian Natl Univ, Dept Psychol, Canberra, ACT, Australia; [Covington, Martin] Univ Calif Berkeley, Dept Psychol, Berkeley, CA 94720 USA	Australian National University; University of California System; University of California Berkeley	De Castella, K (corresponding author), 290 Page St, San Francisco, CA 94102 USA.	krista1@stanford.edu							134	106	186	14	238	AMER PSYCHOLOGICAL ASSOC	WASHINGTON	750 FIRST ST NE, WASHINGTON, DC 20002-4242 USA	0022-0663	1939-2176		J EDUC PSYCHOL	J. Educ. Psychol.	AUG	2013	105	3
J	Martin, AJ; Marsh, HW; Debus, RL				Martin, AJ; Marsh, HW; Debus, RL			Self-handicapping and defensive pessimism: A model of self-protection from a longitudinal perspective	CONTEMPORARY EDUCATIONAL PSYCHOLOGY			English	Article						self-handicapping; defensive pessimism; motivation; self-protection	EXPLORATORY FACTOR-ANALYSIS; GENERAL-APPROACH; STUDENTS USE; ACHIEVEMENT; PREDICTORS; STRATEGIES; OPTIMISM; ANXIETY; ESTEEM; SCHOOL	This research places self-handicapping and defensive pessimism (comprising defensive expectations and reflectivity) into a single conceptual and analytic framework that models the full self-protective process across time. Data on two occasions collected during students' (n = 328) first two years at university show: performance orientation positively predicts self-handicapping, defensive expectati…	Univ Western Sydney, SELF Res Ctr, Penrith, NSW, Australia; Univ Sydney, Fac Educ, Sydney, NSW 2006, Australia	Western Sydney University; University of Sydney	Univ Western Sydney, SELF Res Ctr, Locked Bag 1797, Penrith, NSW, Australia.	a.martin@uws.edu.au	Marsh, Herbert W/B-3134-2017	Marsh, Herbert W/0000-0002-1078-9717; Martin, Andrew/0000-0001-5504-392X					90	105	131	4	35	ACADEMIC PRESS INC ELSEVIER SCIENCE	SAN DIEGO	525 B ST, STE 1900, SAN DIEGO, CA 92101-4495 USA	0361-476X	1090-2384		CONTEMP EDUC PSYCHOL	Contemp. Educ. Psychol.	JAN	2003	28	1
J	Carter, EW; Sisco, LG; Brown, L; Brickham, D; Al-Khabbaz, ZA				Carter, Erik W.; Sisco, Lynn G.; Brown, Lissa; Brickham, Dana; Al-Khabbaz, Zainab A.			Peer Interactions and Academic Engagement of Youth With Developmental Disabilities in Inclusive Middle and High School Classrooms	AMERICAN JOURNAL ON MENTAL RETARDATION			English	Article							GENERAL-EDUCATION CLASSROOMS; MENTAL-RETARDATION; INTELLECTUAL DISABILITIES; SOCIAL INTERACTIONS; PROMOTING ACCESS; STUDENTS; CURRICULUM; SUPPORT; INTERVENTIONS; STRATEGIES	We examined the peer interactions and academic engagement of 23 middle and high school students with developmental disabilities within inclusive academic and elective classrooms. The extent to which students with and without disabilities interacted socially was highly variable and influenced by instructional format, the proximity of general and special educators, and curricular area. Peer interac…	[Carter, Erik W.] Univ Wisconsin, Dept Rehabil Psychol & Special Educ, Madison, WI 53706 USA	University of Wisconsin System; University of Wisconsin Madison	Carter, EW (corresponding author), Univ Wisconsin, Dept Rehabil Psychol & Special Educ, 432 E Campus Mall, Madison, WI 53706 USA.	ewcarter@wisc.edu	Carter, Erik/AAX-3043-2020	Carter, Erik/0000-0001-7153-2782					44	105	160	6	56	AMER ASSOC MENTAL RETARDATION	WASHINGTON	444 N CAPITOL ST, NW, STE 846, WASHINGTON, DC 20001-1512 USA	0895-8017			AM J MENT RETARD	Am. J. Ment. Retard.	NOV	2008	113	6
J	Estell, DB; Perdue, NH				Estell, David B.; Perdue, Neil H.			SOCIAL SUPPORT AND BEHAVIORAL AND AFFECTIVE SCHOOL ENGAGEMENT: THE EFFECTS OF PEERS, PARENTS, AND TEACHERS	PSYCHOLOGY IN THE SCHOOLS			English	Article							ACADEMIC ENGAGEMENT; MOTIVATION; ATTACHMENT; RISK; ACHIEVEMENT; ADJUSTMENT; OUTCOMES; FRIENDS; FAMILY	School engagement has long been seen as an important component of school completion, and research shows that social support in the home and school promotes engagement. However, many researchers have argued that it is not a unitary construct but rather a multifaceted phenomenon, and the role of peer social support has not been as well studied as support from parents and teachers. Our study examine…	[Estell, David B.] Indiana Univ, Bloomington, IN 47405 USA; [Perdue, Neil H.] Univ Indianapolis, Indianapolis, IN USA	Indiana University System; Indiana University Bloomington; University of Indianapolis	Estell, DB (corresponding author), Indiana Univ, Dept Counseling & Educ Psychol, WW Wright Sch Educ, Rm 4010,201 North Rose Ave, Bloomington, IN 47405 USA.	destell@indiana.edu							45	104	177	9	115	WILEY	HOBOKEN	111 RIVER ST, HOBOKEN 07030-5774, NJ USA	0033-3085	1520-6807		PSYCHOL SCHOOLS	Psychol. Schools	APR	2013	50	4
J	Dogan, U				Dogan, Ugur			Student Engagement, Academic Self-efficacy, and Academic Motivation as Predictors of Academic Performance	ANTHROPOLOGIST			English	Article						Academic Performance; Student Engagement; Academic Self-efficacy; Academic Motivation	REGULATED LEARNING-STRATEGIES; HIGH-SCHOOL; ADOLESCENTS PERCEPTIONS; EMOTIONAL INTELLIGENCE; ACHIEVEMENT; BELIEFS; ENVIRONMENT; OUTCOMES; GOALS; PARTICIPATION	The research described in this paper aimed to evaluate the extent to which academic performance is affected by student engagement (students' involvement in school activities and commitment to the school's mission and rules), academic self-efficacy (the students' sense of their own capabilities), and academic motivation (the students' desire to increase their academic performance). The results of …	Mugla Sitki Kocman Univ, Fac Educ, Dept Guidance & Psychol Counselling, Mugla, Turkey	Mugla Sitki Kocman University	Dogan, U (corresponding author), Mugla Sitki Kocman Univ, Fac Educ, Dept Guidance & Psychol Counselling, Mugla, Turkey.	ugurdogan@mu.edu.tr	DOĞAN, Uğur/ABA-6905-2022	DOĞAN, Uğur/0000-0001-7603-6470					64	103	133	35	287	KAMLA-RAJ ENTERPRISES	GURUGRAM	C210, NIRVANA COURTYARD SOUTH CITY 2, GURUGRAM, HARYANA 122 018, INDIA	0972-0073			ANTHROPOLOGIST	Anthropologist	JUN	2015	20	3
J	Oriol-Granado, X; Mendoza-Lira, M; Covarrubias-Apablaza, CG; Molina-Lopez, VM				Oriol-Granado, Xavier; Mendoza-Lira, Michelle; Covarrubias-Apablaza, Carmen-Gloria; Molina-Lopez, Victor-Michel			Positive Emotions, Autonomy Support and Academic Performance of University Students: The Mediating Role of Academic Engagement and Self-efficacy	REVISTA DE PSICODIDACTICA			Spanish	Article						Positive emotions; Self-efficacy; Academic engagement; Academic performance	ACHIEVEMENT; MOTIVATION; PREDICTORS	The overall objective of this study is to prove whether some variables, such as autonomy support and positive affect experienced in the classroom, are predictors of academic performance through self-efficacy and engagement in university students. The tested model confirms the expected results but notes that self-efficacy does not show a significant direct effect on performance. Therefore, a secon…	[Oriol-Granado, Xavier] Univ Santiago, Fac Adm & Econ, Dept Gest & Polit Publ, Santiago, Chile; [Mendoza-Lira, Michelle; Molina-Lopez, Victor-Michel] Univ Autonoma Chile, Fac Educ, Temuco, Chile; [Covarrubias-Apablaza, Carmen-Gloria] Univ Talca, Programa Formac Fundamental, Talca, Chile	Universidad de Santiago de Chile; Universidad Autonoma de Chile; Universidad de Talca	Oriol-Granado, X (corresponding author), Univ Santiago, Fac Adm & Econ, Dept Gest & Polit Publ, Santiago, Chile.	xavier.oriol@usach.cl	Mendoza Lira, Michelle/ABH-2214-2021; Oriol, Xavier/AAO-3112-2021	Oriol, Xavier/0000-0001-7130-7729; Mendoza Lira, Michelle/0000-0003-4275-1841					57	101	123	9	116	ELSEVIER ESPANA	MADRID	CALLE DE ZURBANO, 76-4TH FLR LEFT, MADRID, 28010, SPAIN	1136-1034	2254-4372		REV PSICODIDACT	Rev. Psicodidact.		2017	22	1
J	Kim, HJ; Hong, AJ; Song, HD				Kim, Hye Jeong; Hong, Ah Jeong; Song, Hae-Deok			The roles of academic engagement and digital readiness in students' achievements in university e-learning environments	INTERNATIONAL JOURNAL OF EDUCATIONAL TECHNOLOGY IN HIGHER EDUCATION			English	Article						Digital learning environments; Academic engagement; Academic performance	GRADE-POINT AVERAGE; COLLEGE-STUDENTS; DETERMINANTS; PERFORMANCE; BEHAVIOR; OUTCOMES; FAMILY	University students, who are assumed to be digital natives, are exposed to campus e-learning environments to improve their academic performance at the beginning of their academic careers. However, previous studies of students' perceptions of e-learning demonstrate a lack of consistent results with respect to the prediction of their academic achievement. The goal of this study was to examine unive…	[Kim, Hye Jeong] Chung Ang Univ, Grad Sch Educ, Dept Educ, Seoul, South Korea; [Hong, Ah Jeong; Song, Hae-Deok] Chung Ang Univ, Coll Educ, Dept Educ, Seoul, South Korea	Chung Ang University; Chung Ang University	Song, HD (corresponding author), Chung Ang Univ, Coll Educ, Dept Educ, Seoul, South Korea.	hyejeongkim@cau.ac.kr; hsong@cau.ac.kr	Song, Hae Deok/HJY-0971-2023; Hong, Ah-Jeong/IVV-1478-2023; Kim, Hye Jeong/ABE-7790-2020		Ministry of Education of the Republic of Korea; National Research Foundation of Korea [NRF-2017S1A3A2066878]	Ministry of Education of the Republic of Korea(Ministry of Education (MOE), Republic of Korea); National Research Foundation of Korea(National Research Foundation of Korea)	This work was supported by the Ministry of Education of the Republic of Korea and the National Research Foundation of Korea (NRF-2017S1A3A2066878).		69	101	114	5	74	SPRINGER	NEW YORK	ONE NEW YORK PLAZA, SUITE 4600, NEW YORK, NY, UNITED STATES	2365-9440			INT J EDUC TECHNOL H	Int. J. Educ. Technol. High. Educ.	JUN 21	2019	16
J	Tucker, CM; Zayco, RA; Herman, KC; Reinke, WM; Trujillo, M; Carraway, K; Wallack, C; Ivery, PD				Tucker, CM; Zayco, RA; Herman, KC; Reinke, WM; Trujillo, M; Carraway, K; Wallack, C; Ivery, PD			Teacher and child variables as predictors of academic engagement among low-income African American children	PSYCHOLOGY IN THE SCHOOLS			English	Article							STUDENT ENGAGEMENT; SCHOOL; ACHIEVEMENT; ADOLESCENTS; CLASSROOM; BEHAVIOR; SUPPORT	A causal model for understanding the complex interplay between student-reported teacher behaviors, student self-systems, and student engagement was tested. One hundred seventeen African American students in grades 1 through 12 completed a comprehensive questionnaire regarding teacher context, self, and engagement variables. A series of hierarchical regression analyses were conducted to test the h…	Univ Florida, Gainesville, FL 32611 USA; Reed Coll, Portland, OR 97202 USA; Univ Oregon, Eugene, OR 97403 USA	State University System of Florida; University of Florida; Reed College - Oregon; University of Oregon	Tucker, CM (corresponding author), Univ Florida, POB 112250, Gainesville, FL 32611 USA.		Reinke, Wendy/J-2353-2015	Reinke, Wendy/0000-0001-7235-624X					21	99	190	0	21	JOHN WILEY & SONS INC	HOBOKEN	111 RIVER ST, HOBOKEN, NJ 07030 USA	0033-3085			PSYCHOL SCHOOLS	Psychol. Schools	JUL	2002	39	4
J	Hughes, K; Coplan, RJ				Hughes, Kathleen; Coplan, Robert J.			Exploring Processes Linking Shyness and Academic Achievement in Childhood	SCHOOL PSYCHOLOGY QUARTERLY			English	Article						academic achievement; peer relationships; classroom behavior	SOCIOEMOTIONAL ADJUSTMENT; SCHOOL ADJUSTMENT; CHILDRENS; KINDERGARTEN; TEMPERAMENT; GRADE; SELF; PERFORMANCE; COMPETENCE; TEACHERS	The goal of the current study was to explore the relations between shyness, academic engagement, and academic achievement in childhood. Participants were (n = 125) children (aged 9-13 years) attending public school boards in Canada. Children completed self reports of shyness and were administered a test of nonverbal IQ. Academic achievement was assessed through both teacher ratings and standardiz…	[Hughes, Kathleen; Coplan, Robert J.] Carleton Univ, Dept Psychol, Ottawa, ON K1S 5B6, Canada	Carleton University	Hughes, K (corresponding author), Carleton Univ, Dept Psychol, 1125 Colonel Drive, Ottawa, ON K1S 5B6, Canada.	khughes4@connect.carleton.ca		Hughes, Kathleen/0000-0002-2185-9178					55	99	133	1	40	AMER PSYCHOLOGICAL ASSOC	WASHINGTON	750 FIRST ST NE, WASHINGTON, DC 20002-4242 USA	1045-3830	1939-1560		SCHOOL PSYCHOL QUART	Sch. Psychol. Q.	DEC	2010	25	4
J	Engels, MC; Colpin, H; Van Leeuwen, K; Bijttebier, P; Van Den Noortgate, W; Claes, S; Goossens, L; Verschueren, K				Engels, Maaike C.; Colpin, Hilde; Van Leeuwen, Karla; Bijttebier, Patricia; Van Den Noortgate, Wim; Claes, Stephan; Goossens, Luc; Verschueren, Karine			Behavioral Engagement, Peer Status, and Teacher-Student Relationships in Adolescence: A Longitudinal Study on Reciprocal Influences	JOURNAL OF YOUTH AND ADOLESCENCE			English	Article						Adolescents; Behavioral engagement; Likeability; Peer status; Popularity; Teacher-student relationships	SCHOOL ENGAGEMENT; CHILD RELATIONSHIPS; DEVELOPMENTAL-CHANGES; ACADEMIC ENGAGEMENT; SOCIAL ACCEPTANCE; CLASSROOM; MIDDLE; MOTIVATION; TRAJECTORIES; INSTRUCTION	Although teachers and peers play an important role in shaping students' engagement, no previous study has directly investigated transactional associations of these classroom-based relationships in adolescence. This study investigated the transactional associations between adolescents' behavioral engagement, peer status (likeability and popularity), and (positive and negative) teacher-student rela…	[Engels, Maaike C.; Colpin, Hilde; Bijttebier, Patricia; Goossens, Luc; Verschueren, Karine] KU Leuven Univ Leuven, Fac Psychol & Educ Sci, Sch Psychol & Child & Adolescent Dev, Tiensestr 102,Box 3717, B-3000 Louvain, Belgium; [Van Leeuwen, Karla] KU Leuven Univ Leuven, Fac Psychol & Educ Sci, Parenting & Special Educ Res Unit, Leopold Vanderkelenstr 32,Box 3765, B-3000 Louvain, Belgium; [Van Den…	KU Leuven; KU Leuven; KU Leuven; KU Leuven	Engels, MC (corresponding author), KU Leuven Univ Leuven, Fac Psychol & Educ Sci, Sch Psychol & Child & Adolescent Dev, Tiensestr 102,Box 3717, B-3000 Louvain, Belgium.	Maaike.Engels@ppw.kuleuven.be	Van den Noortgate, Wim/AAB-5969-2020; Van Leeuwen, Karla/AAF-6095-2020	Van den Noortgate, Wim/0000-0003-4011-219X; Van Leeuwen, Karla/0000-0002-6628-3483; Bijttebier, Patricia/0000-0002-0648-7388; Verschueren, Karine/0000-0003-2172-1424; Engels, Maaike/0000-0002-3070-3124; Goossens, Luc/0000-0003-3851-0412; Claes, Stephan/0000-0002-1175-492X	FWO (Research Fund - Flanders) [G.0728.14]; research council of KU Leuven [GOA/12/009]	FWO (Research Fund - Flanders)(FWO); research council of KU Leuven(KU Leuven)	This research project was funded by FWO (Research Fund - Flanders, G.0728.14) and by the research council of KU Leuven (Grant GOA/12/009: STRATEGIES project).		64	99	162	17	136	SPRINGER/PLENUM PUBLISHERS	NEW YORK	233 SPRING ST, NEW YORK, NY 10013 USA	0047-2891	1573-6601		J YOUTH ADOLESCENCE	J. Youth Adolesc.	JUN	2016	45	6
J	Pinquart, M; Ebeling, M				Pinquart, Martin; Ebeling, Markus			Parental Educational Expectations and Academic Achievement in Children and Adolescents-a Meta-analysis	EDUCATIONAL PSYCHOLOGY REVIEW			English	Article						Academic achievement; Expectation; Expectancy; Parents; Meta-analysis	ELEMENTARY-SCHOOL; PUBLICATION BIAS; UNITED-STATES; INVOLVEMENT; ADJUSTMENT	The present meta-analysis assessed concurrent and longitudinal associations between parental educational expectations and child achievement, and factors that mediate the effect of expectations on achievement. A systematic search in electronic databases identified 169 studies that were included in a random-effects meta-analysis. We found small to moderate bivariate cross-sectional (r = .30) and lo…	[Pinquart, Martin; Ebeling, Markus] Philipps Univ, Dept Psychol, Gutenbergstr 18, D-35032 Marburg, Germany	Philipps University Marburg	Pinquart, M (corresponding author), Philipps Univ, Dept Psychol, Gutenbergstr 18, D-35032 Marburg, Germany.	pinquart@staff.uni-marburg.de			German Research Foundation (Deutsche Forschungsgemeinschaft, DFG) [GRK 2271]	German Research Foundation (Deutsche Forschungsgemeinschaft, DFG)(German Research Foundation (DFG))	This study was conducted in the context of the Research Training Group Expectation Maintenance vs. Change in the Context of Expectation Violations: Connecting Different Approaches funded by the German Research Foundation (Deutsche Forschungsgemeinschaft, DFG Ref. no.: GRK 2271).		45	99	121	24	132	SPRINGER/PLENUM PUBLISHERS	NEW YORK	233 SPRING ST, NEW YORK, NY 10013 USA	1040-726X	1573-336X		EDUC PSYCHOL REV	Educ. Psychol. Rev.	JUN	2020	32	2
J	Junod, REV; DuPaul, GJ; Jitendra, AK; Volpe, RJ; Cleary, KS				Junod, REV; DuPaul, GJ; Jitendra, AK; Volpe, RJ; Cleary, KS			Classroom observations of students with and without ADHD: Differences across types of engagement	JOURNAL OF SCHOOL PSYCHOLOGY			English	Article						attention-deficit hyperactivity disorder; classroom behavior; behavior observation	DEFICIT HYPERACTIVITY DISORDER; ACADEMIC ENGAGEMENT; OBSERVATION CODE; TEACHER RATINGS; CHILDREN; BEHAVIOR; ACHIEVEMENT; PERFORMANCE; INATTENTION; VALIDATION	The current study examined the behaviors related to academic engagement exhibited by students with ADHD during instruction in math and reading. A total of 155 students (92 ADHD, 63 recruited controls) in graides 1 through 4 participated in the study. Results revealed that students with ADHD exhibited statistically significant lower rates of academic engagement and higher rates of off-task behavio…	Lehigh Univ, Sch Psychol Program, Bethlehem, PA 18015 USA	Lehigh University	Lehigh Univ, Sch Psychol Program, 111 Res Dr, Bethlehem, PA 18015 USA.	gjd3@lehigh.edu	Volpe, Robert J/JCE-1208-2023; Jitendra, Asha/AAT-8946-2020	, Asha/0000-0002-9406-2768					39	98	156	1	27	PERGAMON-ELSEVIER SCIENCE LTD	OXFORD	THE BOULEVARD, LANGFORD LANE, KIDLINGTON, OXFORD OX5 1GB, ENGLAND	0022-4405	1873-3506		J SCHOOL PSYCHOL	J. Sch. Psychol.	APR	2006	44	2
J	Bahrami, F; Movahedi, A; Marandi, SM; Abedi, A				Bahrami, Fatimah; Movahedi, Ahmadreza; Marandi, Sayed Mohammad; Abedi, Ahmad			Kata techniques training consistently decreases stereotypy in children with autism spectrum disorder	RESEARCH IN DEVELOPMENTAL DISABILITIES			English	Article						Stereotypy; Autism; Kata techniques training; Exercise	SELF-STIMULATORY BEHAVIORS; SCHOOL-AGE-CHILDREN; AEROBIC EXERCISE; ACADEMIC ENGAGEMENT; ANTECEDENT EXERCISE; PHYSICAL EXERCISE; YOUNG-CHILDREN; PROGRAM; SKILLS; INDIVIDUALS	The effects of 14 weeks of Kata techniques training on stereotypic behaviors of children with autism spectrum disorders (ASD) were investigated. The study included 30 eligible (diagnosed ASD, school age) children with ages ranging from 5 to 16 years whom they assigned to an exercise (n = 15) or a no-exercise control group (n = 15). Participants of the exercise group received Kata techniques instr…	[Bahrami, Fatimah; Movahedi, Ahmadreza; Marandi, Sayed Mohammad] Univ Isfahan, Coll Sport Sci, Esfahan, Iran; [Abedi, Ahmad] Univ Isfahan, Coll Educ Psychol, Esfahan, Iran	University of Isfahan; University of Isfahan	Movahedi, A (corresponding author), Univ Isfahan, Coll Sport Sci, Hezar Jarib St, Esfahan, Iran.	fbahrami20@yahoo.com; a.movahedi@spr.ui.ac.ir; s.m.marandi@spr.ui.ac.ir; a.abedi@edu.ui.ac.ir	Movahedi, Ahmadreza/AAH-3856-2020; Movahedi, Ahmadreza/V-5778-2019; McCann, Brian/N-9504-2014	Movahedi, Ahmadreza/0000-0002-2313-4752;					93	98	119	5	68	PERGAMON-ELSEVIER SCIENCE LTD	OXFORD	THE BOULEVARD, LANGFORD LANE, KIDLINGTON, OXFORD OX5 1GB, ENGLAND	0891-4222			RES DEV DISABIL	Res. Dev. Disabil.	JUL-AUG	2012	33	4
J	Stoeber, J; Childs, JH; Hayward, JA; Feast, AR				Stoeber, Joachim; Childs, Julian H.; Hayward, Jennifer A.; Feast, Alexandra R.			Passion and motivation for studying: predicting academic engagement and burnout in university students	EDUCATIONAL PSYCHOLOGY			English	Article						passion; academic engagement; student burnout; motivation; self-concordance theory	SELF-DETERMINATION THEORY; INTRINSIC MOTIVATION; WELL; ACHIEVEMENT; PERFORMANCE; AUTONOMY; SCHOOL; WORK; PERFECTIONISM; DISAFFECTION	Research on the dualistic model of passion has investigated harmonious and obsessive passion in many domains. However, few studies have investigated passion for studying and the role passion for studying plays in student engagement and well-being. The present study investigated the relationships between harmonious and obsessive passion for studying and academic engagement (vigour, dedication and …	[Stoeber, Joachim; Childs, Julian H.; Hayward, Jennifer A.; Feast, Alexandra R.] Univ Kent, Sch Psychol, Canterbury, Kent, England	University of Kent	Stoeber, J (corresponding author), Univ Kent, Sch Psychol, Canterbury, Kent, England.	j.stoeber@kent.ac.uk	Stoeber, Joachim/B-6729-2009	Stoeber, Joachim/0000-0002-6439-9917; Edbrooke-Childs, Julian/0000-0003-0401-4058					56	97	127	3	140	ROUTLEDGE JOURNALS, TAYLOR & FRANCIS LTD	ABINGDON	2-4 PARK SQUARE, MILTON PARK, ABINGDON OX14 4RN, OXON, ENGLAND	0144-3410	1469-5820		EDUC PSYCHOL-UK	Educ. Psychol.		2011	31	4
J	Cadima, J; Doumen, S; Verschueren, K; Buyse, E				Cadima, Joana; Doumen, Sarah; Verschueren, Karine; Buyse, Evelien			Child engagement in the transition to school: Contributions of self-regulation, teacher-child relationships and classroom climate	EARLY CHILDHOOD RESEARCH QUARTERLY			English	Article						Engagement in learning; School transition; Self-regulation; Teacher-child relationship; Classroom organization	EFFORTFUL CONTROL; ACADEMIC ENGAGEMENT; STUDENT-TEACHER; INTERACTIONS ASSOCIATIONS; ACHIEVEMENT TRAJECTORIES; MEASUREMENT INVARIANCE; BEHAVIORAL ENGAGEMENT; 1ST-GRADE CLASSROOM; AGGRESSIVE-BEHAVIOR; ADJUSTMENT PROBLEMS	Framed by a systemic-ecological model of engagement, this study examined cross-grade patterns of behavioral engagement in learning over kindergarten and first grade and the contributions of child inhibitory control and facets of the classroom context (i.e., teacher-child relationship quality, perceived peer-teacher conflict, and classroom organization) to behavioral engagement over this period. P…	[Cadima, Joana] Univ Porto, P-4200135 Oporto, Portugal; [Doumen, Sarah; Verschueren, Karine; Buyse, Evelien] Katholieke Univ Leuven, Dept Psychol, Louvain, Belgium	Universidade do Porto; KU Leuven	Cadima, J (corresponding author), Univ Porto, Fac Psychol & Educ Sci, Rua Alfredo Allen, P-4200135 Oporto, Portugal.	jcadima@fpce.up.pt	Doumen, Sarah/CAH-5727-2022; Doumen, Sarah/CAF-0192-2022; Cadima, Joana/M-1433-2017; Doumen, Sarah/GLV-6897-2022	Doumen, Sarah/0000-0003-4208-4751; Cadima, Joana/0000-0002-8814-8899; Verschueren, Karine/0000-0003-2172-1424					98	96	137	4	70	ELSEVIER SCIENCE INC	NEW YORK	STE 800, 230 PARK AVE, NEW YORK, NY 10169 USA	0885-2006	1873-7706		EARLY CHILD RES Q	Early Childhood Res. Q.		2015	32
J	Vollet, JW; Kindermann, TA; Skinner, EA				Vollet, Justin W.; Kindermann, Thomas A.; Skinner, Ellen A.			In Peer Matters, Teachers Matter: Peer Group Influences on Students' Engagement Depend on Teacher Involvement	JOURNAL OF EDUCATIONAL PSYCHOLOGY			English	Article						student engagement; peer influence; teacher influence; differential susceptibility; joint effects	SCHOOL ENGAGEMENT; INTERPERSONAL RELATIONSHIPS; INDIVIDUAL DEVELOPMENT; ACADEMIC ENGAGEMENT; CHILD RELATIONSHIPS; EARLY ADOLESCENCE; PERCEIVED CONTROL; MOTIVATION; ACHIEVEMENT; CONTEXT	This study focused on the joint effects of teachers and peer groups as predictors of change in students' engagement during the first year of middle school, when the importance of peer relationships normatively increases and the quality of teacher-student relationships typically declines. To explore cumulative and contextualized joint effects, the study utilized 3 sources of information about an e…	[Vollet, Justin W.; Kindermann, Thomas A.; Skinner, Ellen A.] Portland State Univ, Dept Psychol, POB 751, Portland, OR 97207 USA	Portland State University	Vollet, JW (corresponding author), Portland State Univ, Dept Psychol, POB 751, Portland, OR 97207 USA.	jwv@pdx.edu	Vollet, Justin/AAD-1940-2019; Kindermann, Thomas A/A-5307-2008	Vollet, Justin/0000-0001-8508-5602; Kindermann, Thomas A/0000-0003-4546-9649					92	96	113	6	79	AMER PSYCHOLOGICAL ASSOC	WASHINGTON	750 FIRST ST NE, WASHINGTON, DC 20002-4242 USA	0022-0663	1939-2176		J EDUC PSYCHOL	J. Educ. Psychol.	JUL	2017	109	5
J	Martínez, IM; Youssef-Morgan, CM; Chambel, MJ; Marques-Pinto, A				Martinez, Isabel M.; Youssef-Morgan, Carolyn M.; Chambel, Maria J.; Marques-Pinto, Alexandra			Antecedents of academic performance of university students: academic engagement and psychological capital resources	EDUCATIONAL PSYCHOLOGY			English	Article						Academic engagement; psychological capital; psychological resources; academic performance; college students	SOCIAL COGNITIVE THEORY; SELF-EFFICACY; WORK ENGAGEMENT; JOB DEMANDS; POSITIVE PSYCHOLOGY; MEDIATING ROLE; BIG 5; BURNOUT; SATISFACTION; IMPACT	This study investigates the relationship between academic engagement, psychological capital (PsyCap) resources (efficacy, hope, optimism, resilience) and academic performance. Data were collected in two different universities, one in Spain (N = 389) and another in Portugal (N = 243). Undergraduate students completed self-report questionnaires regarding academic engagement and Psychological Capita…	[Martinez, Isabel M.] Univ Jaume 1, Dept Work & Org Psychol, Castellon de La Plana, Spain; [Youssef-Morgan, Carolyn M.] Bellevue Univ, Coll Business, 1000 Galvin Rd South, Bellevue, NE 68005 USA; [Chambel, Maria J.; Marques-Pinto, Alexandra] Univ Lisbon, Fac Psicol, Lisbon, Portugal	Universitat Jaume I; Universidade de Lisboa	Youssef-Morgan, CM (corresponding author), Bellevue Univ, Coll Business, 1000 Galvin Rd South, Bellevue, NE 68005 USA.	cyoussefmorgan@bellevue.edu	Martinez Martinez, Isabel Maria/G-4237-2011; Marques-Pinto, Alexandra/AAG-3718-2020; Chambel, Maria Jose/F-3366-2016	Martinez Martinez, Isabel Maria/0000-0003-3583-8498; Marques-Pinto, Alexandra/0000-0002-9204-9519; Chambel, Maria Jose/0000-0001-6588-7034	Conselleria de Educacion Generalitat Valenciana - Programa Prometeo [PROMETEO/2013/025]	Conselleria de Educacion Generalitat Valenciana - Programa Prometeo	This research was supported by a grant from the Conselleria de Educacion Generalitat Valenciana - Programa Prometeo [PROMETEO/2013/025].		95	96	121	23	152	ROUTLEDGE JOURNALS, TAYLOR & FRANCIS LTD	ABINGDON	2-4 PARK SQUARE, MILTON PARK, ABINGDON OX14 4RN, OXON, ENGLAND	0144-3410	1469-5820		EDUC PSYCHOL-UK	Educ. Psychol.	SEP 14	2019	39	8
J	Neely, L; Rispoli, M; Camargo, S; Davis, H; Boles, M				Neely, Leslie; Rispoli, Mandy; Camargo, Siglia; Davis, Heather; Boles, Margot			The effect of instructional use of an iPad® on challenging behavior and academic engagement for two students with autism	RESEARCH IN AUTISM SPECTRUM DISORDERS			English	Article						iPad (R); Autism spectrum disorder; Challenging behavior; Academic demand	COMPUTER-BASED INTERVENTIONS; SPECTRUM DISORDERS; MOTIVATING OPERATIONS; SMART BOARD; CHILDREN; SKILLS; IPOD; DISABILITIES; INDIVIDUALS	iPads (R) are increasingly used in the education of children with autism spectrum disorder. However, few empirical studies have examined the effects of iPads (R) on student behaviors. The purpose of this study was to compare academic instruction delivered with an iPad (R) to instruction delivered through traditional materials for two students with autism spectrum disorder who engaged in escape-ma…	[Neely, Leslie; Rispoli, Mandy; Camargo, Siglia; Davis, Heather; Boles, Margot] Texas A&M Univ, College Stn, TX 77843 USA	Texas A&M University System; Texas A&M University College Station	Neely, L (corresponding author), Texas A&M Univ, Dept Educ Psychol, 4225 TAMU, College Stn, TX 77843 USA.	cockeril@neo.tamu.edu		Camargo, Siglia Pimentel Hoher/0000-0001-7058-6519					27	95	154	2	92	ELSEVIER SCI LTD	OXFORD	THE BOULEVARD, LANGFORD LANE, KIDLINGTON, OXFORD OX5 1GB, OXON, ENGLAND	1750-9467	1878-0237		RES AUTISM SPECT DIS	Res. Autism Spectr. Disord.	APR	2013	7	4
J	Kessels, U; Heyder, A; Latsch, M; Hannover, B				Kessels, Ursula; Heyder, Anke; Latsch, Martin; Hannover, Bettina			How gender differences in academic engagement relate to students' gender identity	EDUCATIONAL RESEARCH			English	Article						academic achievement; gender stereotypes; gender differences; gender identity; academic engagement	SCHOOL; MATH; STEREOTYPES; MATHEMATICS; STRATEGY; PHYSICS; CHOICES; FEMALE; IMAGE	Background: Gender differences in educational outcomes encompass many different areas. For example, in some educational settings, boys lag behind girls on indicators of educational success, such as leaving certificates and type of school attended. In studies testing performance, boys typically show lower competence in reading compared with girls, yet tend to show higher competence in school subje…	[Kessels, Ursula; Heyder, Anke; Latsch, Martin; Hannover, Bettina] Free Univ Berlin, Dept Educ & Psychol, Berlin, Germany	Free University of Berlin	Kessels, U (corresponding author), Free Univ Berlin, Dept Educ & Psychol, Berlin, Germany.	ursula.kessels@fu-berlin.de	Hannover, Bettina/CAF-0847-2022; Heyder, Anke/U-2248-2019; Hannover, Bettina/CAH-6542-2022	Heyder, Anke/0000-0002-1578-4894; Hannover, Bettina/0000-0003-1916-8455					51	94	126	3	108	ROUTLEDGE JOURNALS, TAYLOR & FRANCIS LTD	ABINGDON	2-4 PARK SQUARE, MILTON PARK, ABINGDON OX14 4RN, OXON, ENGLAND	0013-1881	1469-5847		EDUC RES-UK	Educ. Res.	APR 3	2014	56	2
J	Strati, AD; Schmidt, JA; Maier, KS				Strati, Anna D.; Schmidt, Jennifer A.; Maier, Kimberly S.			Perceived Challenge, Teacher Support, and Teacher Obstruction as Predictors of Student Engagement	JOURNAL OF EDUCATIONAL PSYCHOLOGY			English	Article						teacher support; teacher obstruction; academic challenge; student engagement; science education	HIGH-SCHOOL SCIENCE; CLASSROOM SOCIAL-ENVIRONMENT; ACADEMIC ENGAGEMENT; CHILD RELATIONSHIPS; GENDER-DIFFERENCES; YOUNG ADOLESCENTS; MOTIVATION; ACHIEVEMENT; MIDDLE; PERCEPTIONS	This study explored associations between students' perceptions of challenge, teacher-provided support and obstruction, and students' momentary academic engagement in high school science classrooms. Instrumental and emotional dimensions of support and obstruction were examined separately, and analyses tested whether the relationship between challenge and engagement was moderated by teacher support…	[Strati, Anna D.] Aurora Univ, Sch Educ, 347 South Gladstone Ave, Aurora, IL 60506 USA; [Schmidt, Jennifer A.; Maier, Kimberly S.] Michigan State Univ, Dept Counseling Educ Psychol & Special Educ, E Lansing, MI 48824 USA	Aurora University; Michigan State University	Strati, AD (corresponding author), Aurora Univ, Sch Educ, 347 South Gladstone Ave, Aurora, IL 60506 USA.	astrati@aurora.edu			National Science Foundation [HRD-0827526]	National Science Foundation(National Science Foundation (NSF))	This material is based upon work supported by the National Science Foundation Grant HRD-0827526. Any opinions, findings, conclusions, or recommendations expressed in this material are those of the authors and do not reflect the views of the National Science Foundation. We thank Lynley Anderman and Helen Patrick for helpful comments on earlier versions of this article as well as the valuable sugge…		110	94	137	31	179	AMER PSYCHOLOGICAL ASSOC	WASHINGTON	750 FIRST ST NE, WASHINGTON, DC 20002-4242 USA	0022-0663	1939-2176		J EDUC PSYCHOL	J. Educ. Psychol.	JAN	2017	109	1
J	Morley, L; Alexiadou, N; Garaz, S; González-Monteagudo, J; Taba, M				Morley, Louise; Alexiadou, Nafsika; Garaz, Stela; Gonzalez-Monteagudo, Jose; Taba, Marius			Internationalisation and migrant academics: the hidden narratives of mobility	HIGHER EDUCATION			English	Article						Internationalisation; Migrant academics; Mobility; Identity; Roma; Epistemic justice	HIGHER-EDUCATION; MIGRATION; KNOWLEDGE; LANGUAGE; PATTERNS	Internationalisation is a dominant policy discourse in the field of higher education today, driven by an assemblage of economic, social and educational concerns. It is often presented as an ideologically neutral, coherent, disembodied, knowledge-driven policy intervention-an unconditional good. Mobility is one of the key mechanisms through which internationalisation occurs, and is perceived as a …	[Morley, Louise] Univ Sussex, CHEER, Dept Educ, Essex House, Brighton BN1 9QQ, E Sussex, England; [Alexiadou, Nafsika] Umea Univ, Dept Appl Educ Sci, S-90187 Umea, Sweden; [Garaz, Stela] Roma Educ Fund, Budapest, Hungary; [Gonzalez-Monteagudo, Jose] Univ Seville, Dept Theory & Hist Educ & Social Pedag, Pirotecnia St S-N, E-41013 Seville, Spain; [Taba, Marius] Corvinus Univ Budapest, Inst Sociol &…	University of Sussex; Umea University; University of Sevilla; Corvinus University Budapest	Morley, L (corresponding author), Univ Sussex, CHEER, Dept Educ, Essex House, Brighton BN1 9QQ, E Sussex, England.	L.morley@sussex.ac.uk; nafsika.alexiadou@umu.se; stela.garaz@gmail.com; monteagu@us.es; tabamarius@yahoo.com	Morales, Fabián/HNS-0601-2023; Alexiadou, Nafsika/JFK-7115-2023; González-Monteagudo, José/A-4078-2017	Morley, Louise/0000-0001-6316-756X	European Union [H2020-RISE-2014-643739]	European Union(European Union (EU))	We wish to thank the European Union Horizon 2020 Framework Programme for Research and Innovation for funding the HEIM project (Grant number: H2020-RISE-2014-643739), the 14 interview participants, Emily Danvers for research assistance and the Centre for Higher Education and Equity Research (CHEER), University of Sussex, for their contribution to the data collection, and the anonymous reviewers fo…		96	94	102	4	84	SPRINGER	DORDRECHT	VAN GODEWIJCKSTRAAT 30, 3311 GZ DORDRECHT, NETHERLANDS	0018-1560	1573-174X		HIGH EDUC	High. Educ.	SEP	2018	76	3
J	Douglass, JA; Thomson, G; Zhao, CM				Douglass, John Aubrey; Thomson, Gregg; Zhao, Chun-Mei			The learning outcomes race: the value of self-reported gains in large research universities	HIGHER EDUCATION			English	Article						Learning outcomes; Standardized tests; Global higher education markets; AHELO; Student academic engagement	RESPONSE-SHIFT BIAS	Throughout the world, measuring learning outcomes is viewed by many stakeholders as a relatively new method to judge the value added of colleges and universities. The potential to accurately measure learning gains is also a diagnostic tool for institutional self-improvement. This essay discussed the marketisation of learning outcomes tests, and the relative merits of student experience surveys in…	[Douglass, John Aubrey; Thomson, Gregg; Zhao, Chun-Mei] Univ Calif Berkeley, Ctr Studies Higher Educ, Berkeley, CA 94720 USA	University of California System; University of California Berkeley	Douglass, JA (corresponding author), Univ Calif Berkeley, Ctr Studies Higher Educ, Berkeley, CA 94720 USA.	douglass@berkeley.edu; gthomson@berkeley.edu; mzhao@berkeley.edu							26	92	116	0	59	SPRINGER	DORDRECHT	VAN GODEWIJCKSTRAAT 30, 3311 GZ DORDRECHT, NETHERLANDS	0018-1560	1573-174X		HIGH EDUC	High. Educ.	SEP	2012	64	3
J	DUGAN, E; KAMPS, D; LEONARD, B; WATKINS, N; RHEINBERGER, A; STACKHAUS, J				DUGAN, E; KAMPS, D; LEONARD, B; WATKINS, N; RHEINBERGER, A; STACKHAUS, J			EFFECTS OF COOPERATIVE LEARNING GROUPS DURING SOCIAL-STUDIES FOR STUDENTS WITH AUTISM AND 4TH-GRADE PEERS	JOURNAL OF APPLIED BEHAVIOR ANALYSIS			English	Article						AUTISM; COOPERATIVE LEARNING; INCLUSION	NONHANDICAPPED STUDENTS; INDIVIDUALISTIC INSTRUCTION; MATHEMATICS ACHIEVEMENT; RISK STUDENTS; AT-RISK; HANDICAPS; ATTITUDES; CLASSROOM; BEHAVIORS	We investigated the use of cooperative learning groups as an instructional strategy for integrating 2 students with autism into a fourth-grade social studies class. Baseline consisted of 40 min of teacher-led sessions including lecture, questions and discussion with students, and the use of maps. The intervention condition consisted of 10 min of teacher introduction of new material, followed by c…	UNIV KANSAS,LAWRENCE,KS 66045; KANSAS PUBL SCH,KANSAS CITY,KS	University of Kansas									43	91	134	2	32	JOURNAL APPL BEHAV ANAL	LAWRENCE	DEPT HUMAN DEVELOPMENT, UNIV KANSAS, LAWRENCE, KS 66045	0021-8855			J APPL BEHAV ANAL	J. Appl. Behav. Anal.	SUM	1995	28	2
J	Casuso-Holgado, MJ; Cuesta-Vargas, AI; Moreno-Morales, N; Labajos-Manzanares, MT; Barón-López, FJ; Vega-Cuesta, M				Casuso-Holgado, Maria J.; Cuesta-Vargas, Antonio I.; Moreno-Morales, Noelia; Labajos-Manzanares, Maria T.; Baron-Lopez, Francisco J.; Vega-Cuesta, Manuel			The association between academic engagement and achievement in health sciences students	BMC MEDICAL EDUCATION			English	Article						Academic achievement; Academic engagement; Health sciences students; University education; Cross sectional study	NATIONAL-SURVEY; PERFORMANCE; SATISFACTION; BURNOUT	Background: Educational institutions play an important role in encouraging student engagement, being necessary to know how engaged are students at university and if this factor is involved in student success point and followed. To explore the association between academic engagement and achievement. Methods: Cross-sectional study. The sample consisted of 304 students of Health Sciences. They were …	[Casuso-Holgado, Maria J.; Cuesta-Vargas, Antonio I.; Moreno-Morales, Noelia; Labajos-Manzanares, Maria T.] Queensland Univ Technol, Fac Hlth, Sch Clin Sci, Brisbane, Qld 4001, Australia; [Cuesta-Vargas, Antonio I.; Baron-Lopez, Francisco J.; Vega-Cuesta, Manuel] Univ Malaga, Fac Hlth Sci, E-29071 Malaga, Spain	Queensland University of Technology (QUT); Universidad de Malaga	Cuesta-Vargas, AI (corresponding author), Queensland Univ Technol, Fac Hlth, Sch Clin Sci, Brisbane, Qld 4001, Australia.	acuesta.var@gmail.com	CASUSO-HOLGADO, MARIA JESUS/I-9778-2018; Labajos Manzanares, María Teresa/L-4556-2014; CASUSO-HOLGADO, MARIA JESUS/M-6464-2019; Soto, Lupita LS/N-1097-2017; Baron Lopez, Francisco Javier/O-9249-2016; Moreno Morales, Noelia/E-1141-2018	CASUSO-HOLGADO, MARIA JESUS/0000-0002-4217-6827; Labajos Manzanares, María Teresa/0000-0002-3911-4406; CASUSO-HOLGADO, MARIA JESUS/0000-0002-4217-6827; Cuesta-Vargas, Antonio I/0000-0002-8880-4315; Baron Lopez, Francisco Javier/0000-0001-8707-304X; Moreno Morales, Noelia/0000-0001-5907-9735					48	91	120	6	43	BMC	LONDON	CAMPUS, 4 CRINAN ST, LONDON N1 9XW, ENGLAND		1472-6920		BMC MED EDUC	BMC Med. Educ.	FEB 27	2013	13
J	Lowe, K; Dotterer, AM				Lowe, Katie; Dotterer, Aryn M.			Parental Monitoring, Parental Warmth, and Minority Youths' Academic Outcomes: Exploring the Integrative Model of Parenting	JOURNAL OF YOUTH AND ADOLESCENCE			English	Article						Parental monitoring; Parental warmth; School engagement/academic motivation; Racial/ethnic minority youth	INTRINSIC MOTIVATION; SCHOOL ENGAGEMENT; ADOLESCENTS PERCEPTIONS; SOCIAL-CONTEXT; ACHIEVEMENT; SUCCESS; FAMILY; MIDDLE; GENDER; CHILD	Guided by the integrative model of parenting, the present study investigated the relationship between parental monitoring and racial/ethnic minority adolescents' school engagement and academic motivation as a function of parental warmth, and explored whether these associations varied for boys and girls. Participants (60 % female) were 208 sixth through eighth grade students (63 % African American…	[Lowe, Katie; Dotterer, Aryn M.] Purdue Univ, Dept Human Dev & Family Studies, W Lafayette, IN 47907 USA	Purdue University System; Purdue University	Lowe, K (corresponding author), Purdue Univ, Dept Human Dev & Family Studies, 1202 West State St, W Lafayette, IN 47907 USA.	lowek@purdue.edu	Dotterer, Aryn/KEJ-1000-2024	Dotterer, Aryn/0000-0002-4199-0165					61	91	147	7	83	SPRINGER/PLENUM PUBLISHERS	NEW YORK	233 SPRING ST, NEW YORK, NY 10013 USA	0047-2891	1573-6601		J YOUTH ADOLESCENCE	J. Youth Adolesc.	SEP	2013	42	9
J	Datu, JAD; King, RB; Valdez, JPM				Datu, Jesus Alfonso D.; King, Ronnel B.; Valdez, Jana Patricia M.			Psychological capital bolsters motivation, engagement, and achievement: Cross-sectional and longitudinal studies	JOURNAL OF POSITIVE PSYCHOLOGY			English	Article						Academic achievement; academic engagement; academic motivation; psychological capital	SELF-DETERMINATION THEORY; STUDENTS MOTIVATION; ACADEMIC MOTIVATION; SOCIAL GOALS; PERFORMANCE; HOPE; EMPLOYEES; CONSTRUCT; COGNITION; EFFICACY	Psychological capital (PsyCap) has been widely investigated in the organizational context. However, limited attention has been given to the role of PsyCap in the academic setting. The primary objective of this study was to examine how PsyCap is associated with academic motivation, engagement, and achievement using both cross-sectional (Study 1) and longitudinal (Study 2) approaches. Study 1 revea…	[Datu, Jesus Alfonso D.] Univ Hong Kong, Div Learning Dev & Divers, Fac Educ, Hong Kong, Hong Kong, Peoples R China; [King, Ronnel B.] Educ Univ Hong Kong, Dept Curriculum & Instruct, Hong Kong, Hong Kong, Peoples R China; [Valdez, Jana Patricia M.] San Pablo Coll, San Pablo, Laguna, Philippines; [Valdez, Jana Patricia M.] Univ Hong Kong, Div Informat Technol Studies, Fac Educ, Hong Kong, Hong Ko…	University of Hong Kong; Education University of Hong Kong (EdUHK); University of Hong Kong	Datu, JAD (corresponding author), Univ Hong Kong, Div Learning Dev & Divers, Fac Educ, Hong Kong, Hong Kong, Peoples R China.	jaddatu@hku.hk	King, Ronnel B/AGZ-0675-2022; Valdez, Jana Patricia Millonado/HRC-9854-2023	King, Ronnel B/0000-0003-1723-1748; Valdez, Jana Patricia Millonado/0000-0002-1237-2237; Datu, Jesus Alfonso/0000-0002-8790-1113; KING, Ronnel Bornasal/0000-0002-0648-8508	Education University of Hong Kong [04142]	Education University of Hong Kong	This research was partly supported in part by the Dean's Innovation Grant from The Education University of Hong Kong (#04142) awarded to the second author.		53	91	105	7	93	ROUTLEDGE JOURNALS, TAYLOR & FRANCIS LTD	ABINGDON	2-4 PARK SQUARE, MILTON PARK, ABINGDON OX14 4RN, OXON, ENGLAND	1743-9760	1743-9779		J POSIT PSYCHOL	J. Posit. Psychol.		2018	13	3
J	Gonzales, NA; Germán, M; Kim, SY; George, P; Fabrett, FC; Millsap, R; Dumka, LE				Gonzales, Nancy A.; German, Miguelina; Kim, Su Yeong; George, Preethy; Fabrett, Fairlee C.; Millsap, Roger; Dumka, Larry E.			Mexican American adolescents' cultural orientation, externalizing behavior and academic engagement:: The role of traditional cultural values	AMERICAN JOURNAL OF COMMUNITY PSYCHOLOGY			English	Article						Mexican; immigrant; acculturation; externalizing; academic engagement	SCHOOL; ACCULTURATION; IMPACT; MODEL; ACHIEVEMENT; FAMILY; HOME; BICULTURALISM; WELL	This study of 598 7th grade students of Mexican origin examined the role of traditional cultural values as a mediator of the effects of immigrant status, Mexican cultural orientation and Anglo cultural orientation on adolescent externalizing behavior and academic engagement. Immigrant status of adolescents and their maternal caregivers uniquely predicted increased Mexican cultural orientation and…	[Gonzales, Nancy A.; German, Miguelina; George, Preethy; Fabrett, Fairlee C.; Millsap, Roger] Arizona State Univ, Dept Psychol, Tempe, AZ 85287 USA; [Kim, Su Yeong] Univ Texas Austin, Dept Human Ecol, Austin, TX 78712 USA; [Dumka, Larry E.] Arizona State Univ, Sch Social & Family Dynam, Tempe, AZ 85287 USA	Arizona State University; Arizona State University-Tempe; University of Texas System; University of Texas Austin; Arizona State University; Arizona State University-Tempe	Gonzales, NA (corresponding author), Arizona State Univ, Dept Psychol, POB 871104, Tempe, AZ 85287 USA.	nancy.gonzales@asu.edu			NICHD NIH HHS [R24 HD042849, R24 HD042849-07, R03 HD051629-01A2, R03 HD051629] Funding Source: Medline; NIMH NIH HHS [R01 MH064707-06, P30 MH039246, R01 MH064707-04, T32 MH018387-22, R01 MH064707-01, R01 MH064707-02, R01 MH064707, P30 MH068685, P30 MH039246-15, 5-P30-MH39246-13, T32 MH018387, P30 MH039246-17, R01 MH064707-05, P30 MH068685-04, P30 MH039246-16, R01 MH064707-07, P30 MH039246-18, R01…	NICHD NIH HHS(United States Department of Health & Human ServicesNational Institutes of Health (NIH) - USANIH Eunice Kennedy Shriver National Institute of Child Health & Human Development (NICHD)); NIMH NIH HHS(United States Department of Health & Human ServicesNational Institutes of Health (NIH) - USANIH National Institute of Mental Health (NIMH))			66	90	163	1	25	WILEY	HOBOKEN	111 RIVER ST, HOBOKEN 07030-5774, NJ USA	0091-0562	1573-2770		AM J COMMUN PSYCHOL	Am. J. Community Psychol.	MAR	2008	41	1-2
J	Fisher, M; Pleasants, SL				Fisher, Mary; Pleasants, Stacia L.			Roles, Responsibilities, and Concerns of Paraeducators: Findings From a Statewide Survey	REMEDIAL AND SPECIAL EDUCATION			English	Article						inclusive practices; inclusion; paraprofessionals; teacher preparation	PARAPROFESSIONAL PROXIMITY; ACADEMIC ENGAGEMENT; PEER INTERACTIONS; STUDENTS; DISABILITIES; EDUCATION; RISK	The purpose of this survey study was to obtain descriptive information about job situations of special education paraeducators from paraeducators across one state and determine their perceptions regarding roles, current issues identified in the literature, and other issues of concern. Of particular interest was whether perceptions varied based on (a) paraeducator assignment (one-to-one or group) …	[Fisher, Mary] IUPUI, Indiana Univ Sch Educ, Indianapolis, IN 46202 USA; [Pleasants, Stacia L.] Ivy Tech Community Coll, Lafayette, IN USA	Indiana University System; Indiana University Indianapolis	Fisher, M (corresponding author), IUPUI, Indiana Univ Sch Educ, 902 W New York St, Indianapolis, IN 46202 USA.	fisherm@iupui.edu							33	89	169	2	33	SAGE PUBLICATIONS INC	THOUSAND OAKS	2455 TELLER RD, THOUSAND OAKS, CA 91320 USA	0741-9325	1538-4756		REM SPEC EDUC	Remedial Spec. Educ.	SEP-OCT	2012	33	5
J	Carter, EW; Asmus, J; Moss, CK; Biggs, EE; Bolt, DM; Born, TL; Brock, ME; Cattey, GN; Chen, R; Cooney, M; Fesperman, E; Hochman, JM; Huber, HB; Lequia, JL; Lyons, G; Moyseenko, KA; Riesch, LM; Shalev, RA; Vincent, LB; Weir, K				Carter, Erik W.; Asmus, Jennifer; Moss, Colleen K.; Biggs, Elizabeth E.; Bolt, Dan M.; Born, Tiffany L.; Brock, Matthew E.; Cattey, Gillian N.; Chen, Rui; Cooney, Molly; Fesperman, Ethan; Hochman, Julia M.; Huber, Heartley B.; Lequia, Jenna L.; Lyons, Gregory; Moyseenko, Kerrie A.; Riesch, Lindsay M.; Shalev, Rebecca A.; Vincent, Lori B.; Weir, Katie			Randomized Evaluation of Peer Support Arrangements to Support the Inclusion of High School Students With Severe Disabilities	EXCEPTIONAL CHILDREN			English	Article							INTELLECTUAL DISABILITY; GENERAL CURRICULUM; SOCIAL-INTERACTION; PARAPROFESSIONALS; AUTISM; ACCESS	Enhancing the social and learning experiences of students with severe disabilities in inclusive classrooms has been a long-standing focus of research, legislative, and advocacy efforts. The authors used a randomized controlled experimental design to examine the efficacy of peer support arrangements to improve academic and social outcomes for 51 students with severe disabilities in high school gen…	[Carter, Erik W.; Biggs, Elizabeth E.; Brock, Matthew E.; Cattey, Gillian N.; Chen, Rui; Fesperman, Ethan; Hochman, Julia M.; Huber, Heartley B.] Vanderbilt Univ, Nashville, TN USA; [Asmus, Jennifer; Moss, Colleen K.; Bolt, Dan M.; Born, Tiffany L.; Cooney, Molly; Lequia, Jenna L.; Lyons, Gregory; Moyseenko, Kerrie A.; Riesch, Lindsay M.; Shalev, Rebecca A.; Vincent, Lori B.; Weir, Katie] Univ Wi…	Vanderbilt University; University of Wisconsin System; University of Wisconsin Madison	Carter, EW (corresponding author), Vanderbilt Univ, Dept Special Educ, Peabody Coll, PMB 228, Nashville, TN 37072 USA.;Asmus, J (corresponding author), Univ Wisconsin Madison, Dept Educ Psychol, 1025 W Johnson St, Madison, WI 53706 USA.	erik.carter@vanderbilt.edu; asmus@wisc.edu	Carter, Erik/AAX-3043-2020	Carter, Erik/0000-0001-7153-2782; Shalev, Rebecca/0000-0003-1495-8319; Biggs, Elizabeth/0000-0001-8307-7895					32	89	145	2	35	SAGE PUBLICATIONS INC	THOUSAND OAKS	2455 TELLER RD, THOUSAND OAKS, CA 91320 USA	0014-4029	2163-5560		EXCEPT CHILDREN	Except. Child.	JAN	2016	82	2
J	Price, L; Richardson, JTE; Jelfs, A				Price, Linda; Richardson, John T. E.; Jelfs, Anne			Face-to-face versus online tutoring support in distance education	STUDIES IN HIGHER EDUCATION			English	Article							STUDENT; QUALITY; MODEL	The experiences of students taking the same course by distance learning were compared when tutorial support was provided conventionally ( using limited face-to-face sessions with some contact by telephone and email) or online ( using a combination of computer-mediated conferencing and email). Study 1 was a quantitative survey using an adapted version of the Course Experience Questionnaire and the…	Open Univ, Inst Educ Technol, Milton Keynes MK7 6AA, Bucks, England	Open University - UK	Price, L (corresponding author), Open Univ, Inst Educ Technol, Walton Hall, Milton Keynes MK7 6AA, Bucks, England.	l.price@open.ac.uk		Richardson, John/0000-0002-6267-0603; Price, Linda/0000-0001-5291-0469					30	87	109	2	33	ROUTLEDGE JOURNALS, TAYLOR & FRANCIS LTD	ABINGDON	2-4 PARK SQUARE, MILTON PARK, ABINGDON OX14 4RN, OXON, ENGLAND	0307-5079	1470-174X		STUD HIGH EDUC	Stud. High. Educ.	FEB	2007	32	1
J	Benner, AD; Boyle, AE; Bakhtiari, F				Benner, Aprile D.; Boyle, Alaina E.; Bakhtiari, Farin			Understanding Students' Transition to High School: Demographic Variation and the Role of Supportive Relationships	JOURNAL OF YOUTH AND ADOLESCENCE			English	Article						Social support; School transitions; Socioemotional well-being; Academic performance; School belonging	SOCIAL SUPPORT; GENDER DIFFERENCES; IMMIGRANT PARADOX; ACADEMIC SUPPORT; MIDDLE SCHOOL; FAMILY INCOME; LIFE-COURSE; ADOLESCENT; ACHIEVEMENT; ENGAGEMENT	The transition to high school is disruptive for many adolescents, yet little is known about the supportive relational processes that might attenuate the challenges students face as they move from middle to high school, particularly for students from more diverse backgrounds. Identifying potential buffers that protect youth across this critical educational transition is important for informing mor…	[Benner, Aprile D.; Boyle, Alaina E.; Bakhtiari, Farin] Univ Texas Austin, Dept Human Dev & Family Sci, 1 Univ Stn Stop A2702, Austin, TX 78712 USA	University of Texas System; University of Texas Austin	Benner, AD (corresponding author), Univ Texas Austin, Dept Human Dev & Family Sci, 1 Univ Stn Stop A2702, Austin, TX 78712 USA.	abenner@prc.utexas.edu	Bakhtiari, Farin/AAI-2103-2019	Bakhtiari, Farin/0000-0003-0550-7532; Boyle, Alaina/0000-0003-3071-3506	William T. Grant Foundation; National Institute of Child Health and Human Development [R24 HD42849]	William T. Grant Foundation; National Institute of Child Health and Human Development(United States Department of Health & Human ServicesNational Institutes of Health (NIH) - USANIH Eunice Kennedy Shriver National Institute of Child Health & Human Development (NICHD))	This study was made possible by the generous support of the William T. Grant Foundation to Aprile Benner and from the National Institute of Child Health and Human Development to the Population Research Center, University of Texas at Austin (R24 HD42849).		56	87	109	0	43	SPRINGER/PLENUM PUBLISHERS	NEW YORK	233 SPRING ST, NEW YORK, NY 10013 USA	0047-2891	1573-6601		J YOUTH ADOLESCENCE	J. Youth Adolesc.	OCT	2017	46	10
J	Franco, C; Amutio, A; López-González, L; Oriol, X; Martínez-Taboada, C				Franco, Clemente; Amutio, Alberto; Lopez-Gonzalez, Luis; Oriol, Xavier; Martinez-Taboada, Cristina			Effect of a Mindfulness Training Program on the Impulsivity and Aggression Levels of Adolescents with Behavioral Problems in the Classroom	FRONTIERS IN PSYCHOLOGY			English	Article						mindfulness; impulsivity; aggressiveness; school failure; students	HIGH-SCHOOL-STUDENTS; INTERVENTION; RELAXATION; MEDITATION; ATTENTION; EMOTIONS; CHILDREN; CLIMATE; SCALE; SELF	Objective: The aim of the present study was to analyze the effects of a mindfulness training psycho-educative program on impulsivity and aggression levels in a sample of high school students. Methods: A randomized controlled trial with pre-test post-test measurements was applied to an experimental group and a control group (waiting list). The Barratt Impulsivity Scale (BIS-11) Patton et al. (1995…	[Franco, Clemente] Univ Almeria, Fac Educ Sci, Dept Psychol, Almeria, Spain; [Amutio, Alberto; Martinez-Taboada, Cristina] Univ Basque Country, Fac Psychol, Dept Social Psychol & Methodol Behav, San Sebastian, Spain; [Lopez-Gonzalez, Luis] Univ Barcelona, Inst Educ Sci, Barcelona, Spain; [Oriol, Xavier] Univ Santiago Chile, Dept Management & Publ Policies, Santiago, Chile	Universidad de Almeria; University of Basque Country; University of Barcelona; Universidad de Santiago de Chile	Amutio, A (corresponding author), Univ Basque Country, Fac Psychol, Dept Social Psychol & Methodol Behav, San Sebastian, Spain.	alberto.amutio@ehu.eus	Amutio, Alberto/AAP-7380-2020; Oriol, Xavier/AAO-3112-2021	Amutio, Alberto/0000-0003-3989-9992; Oriol, Xavier/0000-0001-7130-7729	National R+D Plan of the Ministry of Economy and Finance [EDU2011-26887]	National R+D Plan of the Ministry of Economy and Finance	This study is part of the project Education for Cross-cultural Health in Immigrant and Native Adolescents from Almeria: Analysis and intervention for optimization and improvement supported by the National R+D Plan of the Ministry of Economy and Finance (Ref: EDU2011-26887).		64	86	113	3	113	FRONTIERS MEDIA SA	LAUSANNE	AVENUE DU TRIBUNAL FEDERAL 34, LAUSANNE, CH-1015, SWITZERLAND	1664-1078			FRONT PSYCHOL	Front. Psychol.	SEP 22	2016	7
J	Van Ryzin, MJ; Roseth, CJ				Van Ryzin, Mark J.; Roseth, Cary J.			Cooperative Learning in Middle School: A Means to Improve Peer Relations and Reduce Victimization, Bullying, and Related Outcomes	JOURNAL OF EDUCATIONAL PSYCHOLOGY			English	Article						cooperative learning; bullying; victimization; peer relations; middle school	DIFFICULTIES QUESTIONNAIRE SDQ; PSYCHOLOGICAL ADJUSTMENT; ACADEMIC ENGAGEMENT; EARLY ADOLESCENCE; STRESS; AGGRESSION; CHILDHOOD; ACHIEVEMENT; STABILITY; STRENGTHS	Peer victimization is a highly stressful experience that impacts up to a third of all adolescents and can contribute to a variety of negative outcomes, including elevated anxiety, depression, drug use, and delinquency, as well as reduced self-esteem, school attendance, and academic achievement. Current prevention approaches (e.g., the Olweus program) have a mixed record in American schools. We pr…	[Van Ryzin, Mark J.] Oregon Res Inst, 1776 Millrace Dr, Eugene, OR 97403 USA; [Roseth, Cary J.] Michigan State Univ, Coll Educ, E Lansing, MI USA	Oregon Research Institute; Michigan State University	Van Ryzin, MJ (corresponding author), Oregon Res Inst, 1776 Millrace Dr, Eugene, OR 97403 USA.	markv@ori.org			National Institute on Alcohol Abuse and Alcoholism (NIAAA) [R34AA024275]	National Institute on Alcohol Abuse and Alcoholism (NIAAA)(United States Department of Health & Human ServicesNational Institutes of Health (NIH) - USANIH National Institute on Alcohol Abuse & Alcoholism (NIAAA))	Financial support for this project was provided by National Institute on Alcohol Abuse and Alcoholism (NIAAA) Grant R34AA024275 to Mark J. Van Ryzin (principal investigator). The content of this article is solely the responsibility of the authors and does not necessarily represent the official views of the NIAAA or the National Institutes of Health.		74	86	106	9	128	AMER PSYCHOLOGICAL ASSOC	WASHINGTON	750 FIRST ST NE, WASHINGTON, DC 20002-4242 USA	0022-0663	1939-2176		J EDUC PSYCHOL	J. Educ. Psychol.	NOV	2018	110	8
J	Carmona-Halty, M; Salanova, M; Llorens, S; Schaufeli, WB				Carmona-Halty, Marcos; Salanova, Marisa; Llorens, Susana; Schaufeli, Wilmar B.			Linking positive emotions and academic performance: The mediated role of academic psychological capital and academic engagement	CURRENT PSYCHOLOGY			English	Article						Positive emotions; Academic psychological capital; Academic engagement; Academic performance; High school students	TEACHER-STUDENT RELATIONSHIPS; UNIVERSITY-STUDENTS; SCHOOL ENGAGEMENT; WORK ENGAGEMENT; IMPACT; RESOURCES; BURNOUT; ACHIEVEMENT; EXPERIENCES; CROSSOVER	The present study examined the relationship between positive emotions and academic performance, and the mediated role played by academic psychological capital and academic engagement, in a sample of 497 Chilean high school students. Participants ' ages ranged from 14 to 17 years old, with a mean of 15.71 (SD = 1.15). Findings supported our hypothesized model that academic psychological capital an…	[Carmona-Halty, Marcos] Univ Tarapaca, Escuela Psicol & Filosofia, Avda 18 Septiembre, Arica 2222, Chile; [Salanova, Marisa; Llorens, Susana] Univ Jaume 1, Want Res Team, Castellon De La Plana, Spain; [Schaufeli, Wilmar B.] Katholieke Univ Leuven, Res Unit Occupat & Org Psychol & Profess Learning, Louvain, Belgium; [Schaufeli, Wilmar B.] Univ Utrecht, Dept Psychol, Utrecht, Netherlands	Universidad de Tarapaca; Universitat Jaume I; KU Leuven; Utrecht University	Carmona-Halty, M (corresponding author), Univ Tarapaca, Escuela Psicol & Filosofia, Avda 18 Septiembre, Arica 2222, Chile.	mcarmonah@uta.cl	Salanova, Marisa/B-4354-2011; Llorens, Susana/C-9719-2011; Schaufeli, Wilmar/B-9645-2013	Salanova, Marisa/0000-0001-7873-7078; Llorens, Susana/0000-0001-7545-5286; Schaufeli, Wilmar/0000-0002-6070-7150; Carmona-Halty, Marcos/0000-0003-4475-1175					58	85	105	66	403	SPRINGER	NEW YORK	ONE NEW YORK PLAZA, SUITE 4600, NEW YORK, NY, UNITED STATES	1046-1310	1936-4733		CURR PSYCHOL	Curr. Psychol.	JUN	2021	40	6
J	Nicholson, H; Kehle, TJ; Bray, MA; Van Heest, J				Nicholson, Heather; Kehle, Thomas J.; Bray, Melissa A.; Van Heest, Jaci			THE EFFECTS OF ANTECEDENT PHYSICAL ACTIVITY ON THE ACADEMIC ENGAGEMENT OF CHILDREN WITH AUTISM SPECTRUM DISORDER	PSYCHOLOGY IN THE SCHOOLS			English	Article							STEREOTYPIC BEHAVIORS; EXERCISE	A multiple baseline design was used to examine the effects of participation in antecedent physical activity on the academic engagement of four elementary-school children diagnosed with autism spectrum disorder (ASD). The results indicated large effect sizes for academic engaged time for all four students. It was suggested that physical activity in the form of something as simple to implement as j…	[Kehle, Thomas J.] Univ Connecticut, Dept Educ Psychol, Storrs, CT 06269 USA	University of Connecticut	Kehle, TJ (corresponding author), Univ Connecticut, Dept Educ Psychol, Storrs, CT 06269 USA.	thomas.kehle@uconn.edu							28	84	133	1	44	WILEY	HOBOKEN	111 RIVER ST, HOBOKEN 07030-5774, NJ USA	0033-3085	1520-6807		PSYCHOL SCHOOLS	Psychol. Schools	FEB	2011	48	2
J	Price, L				Price, L.			Gender differences and similarities in online courses: challenging stereotypical views of women	JOURNAL OF COMPUTER ASSISTED LEARNING			English	Article						conceptions of tutoring; gender differences; online learning; student learning research; women and online learning	COMPUTER-MEDIATED INTERACTION; ACADEMIC QUALITY; PERCEPTIONS; EXPERIENCES; EDUCATION; INTERNET; STUDENT	This paper considers gender differences in online contexts and examines current trends in women's performance, access and experience of online courses. It uses supportive case study examples and specific research into students' academic engagement, conceptions and perceptions of learning support in online environments. The analysis shows that women studying online are confident independent learne…	Open Univ, Inst Educ Technol, Milton Keynes MK7 6AA, Bucks, England	Open University - UK	Price, L (corresponding author), Open Univ, Inst Educ Technol, Walton Hall, Milton Keynes MK7 6AA, Bucks, England.	L.Price@open.ac.uk		Price, Linda/0000-0001-5291-0469					49	83	128	0	19	WILEY	HOBOKEN	111 RIVER ST, HOBOKEN 07030-5774, NJ USA	0266-4909	1365-2729		J COMPUT ASSIST LEAR	J. Comput. Assist. Learn.	OCT	2006	22	5
J	Konold, T; Cornell, D; Shukla, K; Huang, F				Konold, Timothy; Cornell, Dewey; Shukla, Kathan; Huang, Francis			Racial/Ethnic Differences in Perceptions of School Climate and Its Association with Student Engagement and Peer Aggression	JOURNAL OF YOUTH AND ADOLESCENCE			English	Article						School climate; Race/Ethnicity; Multilevel modeling; Race differences	AUTHORITATIVE SCHOOL; ACADEMIC ENGAGEMENT; MULTILEVEL; VICTIMIZATION; MIDDLE; ADOLESCENCE; PREDICTORS; CHILDHOOD; TEACHERS; VALIDITY	Research indicates that a positive school climate is associated with higher levels of student engagement and lower rates of peer aggression. However, less attention has been given to whether such findings are consistent across racial/ethnic groups. The current study examined whether Black, Hispanic, and White high school students differed in their perceptions of school climate, student engagement…	[Konold, Timothy; Cornell, Dewey] Univ Virginia, Charlottesville, VA 22904 USA; [Shukla, Kathan] Indian Inst Management Ahmedabad, Ahmadabad, Gujarat, India; [Huang, Francis] Univ Missouri, Columbia, MO 65211 USA	University of Virginia; Indian Institute of Management (IIM System); Indian Institute of Management Ahmedabad; University of Missouri System; University of Missouri Columbia	Konold, T (corresponding author), Univ Virginia, Charlottesville, VA 22904 USA.	Konold@Virginia.edu	Huang, Francis/C-2159-2015; Shukla, Kathan/ABA-9178-2020	Huang, Francis/0000-0002-5900-7763; Cornell, Dewey/0000-0002-3631-1527; Konold, Timothy/0000-0003-0092-9234; Shukla, Kathan Dushyant/0000-0002-9236-9707	Office of Juvenile Justice and Delinquency Prevention, Office of Justice Programs, U.S. Department of Justice [2012-JF-FX-0062]; National Institute of Justice, Office of Justice Programs, U.S. Department of Justice [NIJ 2014-CK-BX-0004]	Office of Juvenile Justice and Delinquency Prevention, Office of Justice Programs, U.S. Department of Justice; National Institute of Justice, Office of Justice Programs, U.S. Department of Justice	This project was supported by Grant #2012-JF-FX-0062 awarded by the Office of Juvenile Justice and Delinquency Prevention, Office of Justice Programs, U.S. Department of Justice; and Grant #NIJ 2014-CK-BX-0004 awarded by the National Institute of Justice, Office of Justice Programs, U.S. Department of Justice. The opinions, findings, and conclusions or recommendations expressed in this publicatio…		74	83	133	0	28	SPRINGER/PLENUM PUBLISHERS	NEW YORK	233 SPRING ST, NEW YORK, NY 10013 USA	0047-2891	1573-6601		J YOUTH ADOLESCENCE	J. Youth Adolesc.	JUN	2017	46	6
J	Travis, R; Leech, TGJ				Travis, Raphael, Jr.; Leech, Tamara G. J.			Empowerment-Based Positive Youth Development: A New Understanding of Healthy Development for African American Youth	JOURNAL OF RESEARCH ON ADOLESCENCE			English	Article							RACIAL IDENTITY; ETHNIC-IDENTITY; RESIDENTIAL SEGREGATION; SELF-ESTEEM; PSYCHOLOGICAL DISTRESS; ACADEMIC ENGAGEMENT; GENDER-DIFFERENCES; CIVIC ENGAGEMENT; LOW-INCOME; ADOLESCENTS	A shift occurred in research about adolescents in the general population. Research is moving away from deficits toward a resilience paradigm and understanding trajectories of positive youth development. This shift has been less consistent in research and practice with African American youth. A gap also exists in understanding whether individual youth development dimensions generate potential in o…	[Travis, Raphael, Jr.] Texas State Univ San Marcos, San Marcos, TX 78666 USA; [Leech, Tamara G. J.] Indiana Univ Purdue Univ, Indianapolis, IN 46202 USA	Texas State University System; Texas State University San Marcos; Indiana University System; Indiana University Indianapolis	Travis, R (corresponding author), Texas State Univ San Marcos, Sch Social Work, 601 Univ Dr, San Marcos, TX 78666 USA.	rtravis@txstate.edu	Leech, Tamara/ABD-1310-2020	Travis, Raphael/0000-0001-5731-4869; Leech, Tamara/0000-0003-2739-5367					165	82	132	1	49	WILEY	HOBOKEN	111 RIVER ST, HOBOKEN 07030-5774, NJ USA	1050-8392	1532-7795		J RES ADOLESCENCE	J. Res. Adolesc.	MAR	2014	24	1
J	Cornell, D; Shukla, K; Konold, TR				Cornell, Dewey; Shukla, Kathan; Konold, Timothy R.			Authoritative School Climate and Student Academic Engagement, Grades, and Aspirations in Middle and High Schools	AERA OPEN			English	Article						school climate	ZERO TOLERANCE POLICIES; SOCIOECONOMIC-STATUS; CULTURAL-PLURALISM; ACHIEVEMENT; VALIDITY; SAFETY; BEHAVIOR; VIOLENCE; FAMILY; PARENT	This study tested the theory that an authoritative school climate characterized by disciplinary structure and student support is conducive to positive academic outcomes for middle and high school students. Multilevel multivariate modeling at student and school levels was conducted using school surveys completed by statewide samples of 39,364 students in Grades 7 and 8 in 423 middle schools and 48…	[Cornell, Dewey] Univ Virginia, Curry Sch Educ, Educ, Charlottesville, VA 22903 USA; [Shukla, Kathan] Univ Virginia, Educ Stat, Charlottesville, VA 22903 USA; [Konold, Timothy R.] Univ Virginia, Curry Sch Educ, Quantitat Methods, Charlottesville, VA 22903 USA	University of Virginia; University of Virginia; University of Virginia	Cornell, D (corresponding author), Univ Virginia, Curry Sch Educ, Educ, Charlottesville, VA 22903 USA.		Shukla, Kathan/ABA-9178-2020	Shukla, Kathan Dushyant/0000-0002-9236-9707	Office of Juvenile Justice and Delinquency Prevention, Office of Justice Programs, U.S. Department of Justice [2012-JF-FX-0062]	Office of Juvenile Justice and Delinquency Prevention, Office of Justice Programs, U.S. Department of Justice	We thank Donna Michaelis and Jessica Smith of the Virginia Department of Criminal Justice Services and Cynthia Cave of the Virginia Department of Education for their support of the Virginia Secondary School Climate Study. We thank members of the project research team, including Juliette Berg, Pooja Datta, Anna Heilbrun, Francis Huang, Marisa Malone, Patrick Meyer, Xiaoxin Wei, and Joy Yuane Jia. …		90	82	117	2	21	SAGE PUBLICATIONS INC	THOUSAND OAKS	2455 TELLER RD, THOUSAND OAKS, CA 91320 USA		2332-8584		AERA OPEN	AERA Open	APR-JUN	2016	2	2
J	Bryant, AL; Zimmermann, MA				Bryant, AL; Zimmermann, MA			Role models and psychosocial outcomes among African American adolescents	JOURNAL OF ADOLESCENT RESEARCH			English	Article; Proceedings Paper	Biannual Conference of the Society-for-Research-in-Child-Development	APR, 1997	WASHINGTON, D.C.	Soc Res Child Dev			SOCIAL SUPPORT; SIGNIFICANT OTHERS; EXTENDED FAMILY; PERSONAL RELATIONSHIPS; GENDER DIFFERENCES; SUBSTANCE USE; DRUG-USE; BLACK; YOUNG; NETWORKS	The authors examined who 679 African American ninth-graders from urban environments look up to and how their role model choices relate to substance use, delinquency, academic engagement, and psychological well-being. Male adolescents without male role models and females identifying brothers as role models reported the most problem behavior. Adolescents with paternal male role models had the most …	Univ Missouri, Dept Educ Sch & Counseling Psychol, Columbia, MO 65211 USA; Univ Michigan, Ann Arbor, MI 48109 USA	University of Missouri System; University of Missouri Columbia; University of Michigan System; University of Michigan	Bryant, AL (corresponding author), Univ Missouri, Dept Educ Sch & Counseling Psychol, 16 Hill Hall, Columbia, MO 65211 USA.								69	81	133	0	8	SAGE PUBLICATIONS INC	THOUSAND OAKS	2455 TELLER RD, THOUSAND OAKS, CA 91320 USA	0743-5584			J ADOLESCENT RES	J. Adolesc. Res.	JAN	2003	18	1
J	Hurd, NM; Sellers, RM				Hurd, Noelle M.; Sellers, Robert M.			Black Adolescents' Relationships With Natural Mentors: Associations With Academic Engagement via Social and Emotional Development	CULTURAL DIVERSITY & ETHNIC MINORITY PSYCHOLOGY			English	Article						natural mentors; Black adolescents; academic engagement; social and emotional development	DISCRIMINATION EXPERIENCES; YOUTH; ADULTS; PREDICTORS; DURATION; MOTHERS; YOUNG; TIME	This study aimed to identify types of natural mentoring relationships that Black adolescents may experience and to connect these relationship types to academic outcomes via social and emotional development. Data were collected from 259 adolescents attending 3 middle schools in a Midwestern metropolitan area. Adolescents reported on whether or not they had a relationship with a natural mentor and …	[Hurd, Noelle M.] Univ Virginia, Dept Psychol, Charlottesville, VA 22904 USA; [Sellers, Robert M.] Univ Michigan, Dept Psychol, Ann Arbor, MI 48109 USA	University of Virginia; University of Michigan System; University of Michigan	Hurd, NM (corresponding author), Univ Virginia, Dept Psychol, 102 Gilmer Hall,POB 400400, Charlottesville, VA 22904 USA.	nh3v@virginia.edu			Direct For Social, Behav & Economic Scie; Division Of Behavioral and Cognitive Sci [0820309] Funding Source: National Science Foundation	Direct For Social, Behav & Economic Scie; Division Of Behavioral and Cognitive Sci(National Science Foundation (NSF)NSF - Directorate for Social, Behavioral & Economic Sciences (SBE))			51	80	140	2	31	EDUCATIONAL PUBLISHING FOUNDATION-AMERICAN PSYCHOLOGICAL ASSOC	WASHINGTON	750 FIRST ST, NE, WASHINGTON, DC 20002-4242 USA	1099-9809	1939-0106		CULT DIVERS ETHN MIN	Cult. Divers. Ethn. Minor. Psychol.	JAN	2013	19	1
J	Marbell, KN; Grolnick, WS				Marbell, Kristine N.; Grolnick, Wendy S.			Correlates of parental control and autonomy support in an interdependent culture: A look at Ghana	MOTIVATION AND EMOTION			English	Article						Parental control; Autonomy support; Culture; Collectivist culture; Self-determination theory	CHILD DEPRESSION INVENTORY; SELF-DETERMINATION THEORY; INTRINSIC MOTIVATION; PERCEPTION PROFILE; ADOLESCENTS; CHOICE; PERSPECTIVE; RETHINKING; COMPETENCE; STUDENTS	It is unclear whether, similar to research findings in Western societies, autonomy support is associated with positive child outcomes, and forceful control with negative outcomes in collectivist societies. A two-part study (N = 190 Ghanaian sixth graders) examined the relations of parental structure, control, and autonomy support in Ghana with child outcomes, and whether autonomy support was at o…	[Marbell, Kristine N.; Grolnick, Wendy S.] Clark Univ, Dept Psychol, Worcester, MA 01610 USA	Clark University	Marbell, KN (corresponding author), Clark Univ, Dept Psychol, 950 Main St, Worcester, MA 01610 USA.	kmarbell@clarku.edu							83	80	96	7	60	SPRINGER/PLENUM PUBLISHERS	NEW YORK	233 SPRING ST, NEW YORK, NY 10013 USA	0146-7239	1573-6644		MOTIV EMOTION	Motiv. Emot.	MAR	2013	37	1
J	Bottiani, JH; Bradshaw, CP; Mendelson, T				Bottiani, Jessika H.; Bradshaw, Catherine P.; Mendelson, Tamar			Inequality in Black and White High School Students' Perceptions of School Support: An Examination of Race in Context	JOURNAL OF YOUTH AND ADOLESCENCE			English	Article						School climate; Engagement; Racial disparities; School diversity; Social support	GOODNESS-OF-FIT; AFRICAN-AMERICAN YOUTH; RACIAL-DISCRIMINATION; TEACHER RELATIONSHIPS; ACADEMIC ENGAGEMENT; DEFICIT THINKING; DISCIPLINE GAP; CLIMATE; ACHIEVEMENT; EXPERIENCES	Supportive relationships with adults at school are critical to student engagement in adolescence. Additional research is needed to understand how students' racial backgrounds interact with the school context to shape their perceptions of school support. This study employed multilevel, latent variable methods with a sample of Black and White students (N = 19,726, 35.8 % Black, 49.9 % male, mean ag…	[Bottiani, Jessika H.; Bradshaw, Catherine P.] Univ Virginia, Curry Sch Educ, Ruffner Hall,212,407 Emmet St South, Charlottesville, VA 22903 USA; [Mendelson, Tamar] Johns Hopkins Bloomberg Sch Publ Hlth, 642 N Broadway,Hampton House 853, Baltimore, MD 21205 USA	University of Virginia; Johns Hopkins University; Johns Hopkins Bloomberg School of Public Health	Bottiani, JH (corresponding author), Univ Virginia, Curry Sch Educ, Ruffner Hall,212,407 Emmet St South, Charlottesville, VA 22903 USA.	jessika.bottiani@virginia.edu; Catherine.Bradshaw@virginia.edu; tmendel1@jhu.edu	Bottiani, Jessika/AEI-2801-2022	Bottiani, Jessika/0000-0001-7810-1707	U.S. Department of Education [IES R324A110107, R324A07118]; William T. Grant Foundation	U.S. Department of Education(US Department of Education); William T. Grant Foundation	This study was funded in part by grants from the U.S. Department of Education (IES R324A110107 and R324A07118) and William T. Grant Foundation.		91	80	185	1	20	SPRINGER/PLENUM PUBLISHERS	NEW YORK	233 SPRING ST, NEW YORK, NY 10013 USA	0047-2891	1573-6601		J YOUTH ADOLESCENCE	J. Youth Adolesc.	JUN	2016	45	6
J	Heyder, A; Kessels, U				Heyder, Anke; Kessels, Ursula			Is School Feminine? Implicit Gender Stereotyping of School as a Predictor of Academic Achievement	SEX ROLES			English	Article						Gender gap in academic achievement; Gender role self-concept; Implicit measures; Stereotypes; School	ROLE SELF-CONCEPT; ELEMENTARY-SCHOOL; SEX-DIFFERENCES; MATH; BOYS; STUDENTS; MASCULINITY; MATHEMATICS; CHILDREN; FEMALE	One cause proposed for boys' relatively lower academic achievement is a feminisation of schools that might result in a lack of fit between boys' self-concept and academic engagement. Research so far has investigated math-male and language-female stereotypes, but no school-female stereotypes. Our study tested for implicit gender stereotyping of school and its impact on boys' achievement in N = 122…	[Heyder, Anke; Kessels, Ursula] Free Univ Berlin, Dept Educ & Psychol, D-14195 Berlin, Germany	Free University of Berlin	Heyder, A (corresponding author), Free Univ Berlin, Dept Educ & Psychol, Habelschwerdter Allee 45, D-14195 Berlin, Germany.	anke.heyder@fu-berlin.de	Heyder, Anke/U-2248-2019	Heyder, Anke/0000-0002-1578-4894					75	79	102	0	78	SPRINGER/PLENUM PUBLISHERS	NEW YORK	233 SPRING ST, NEW YORK, NY 10013 USA	0360-0025	1573-2762		SEX ROLES	Sex Roles	DEC	2013	69	11-12
J	Galla, BM; Wood, JJ; Tsukayama, E; Har, K; Chiu, AW; Langer, DA				Galla, Brian M.; Wood, Jeffrey J.; Tsukayama, Eli; Har, Kim; Chiu, Angela W.; Langer, David A.			A longitudinal multilevel model analysis of the within-person and between-person effect of effortful engagement and academic self-efficacy on academic performance	JOURNAL OF SCHOOL PSYCHOLOGY			English	Article						Academic engagement; Self-efficacy; Self-regulation; Noncognitive skills; Academic performance	STUDENT ENGAGEMENT; EXECUTIVE FUNCTION; SCHOOL ENGAGEMENT; ACHIEVEMENT; BELIEFS; TRAJECTORIES; BEHAVIOR; CLASSROOM; TEACHER; COMPETENCE	Using data from an accelerated longitudinal study, we examined the within-person and between-person effect of effortful engagement and academic self-efficacy on academic performance across students (N = 135) in elementary school. Teachers assessed participants' effortful engagement and participants rated their academic self-efficacy once per year for 3 years. Academic performance was assessed thr…	[Galla, Brian M.; Wood, Jeffrey J.; Har, Kim] Univ Calif Los Angeles, Dept Educ, Los Angeles, CA USA; [Tsukayama, Eli] Univ Penn, Dept Psychol, Philadelphia, PA 19104 USA; [Chiu, Angela W.; Langer, David A.] Univ Calif Los Angeles, Dept Psychol, Los Angeles, CA 90024 USA	University of California System; University of California Los Angeles; University of Pennsylvania; University of California System; University of California Los Angeles	Galla, BM (corresponding author), Univ Penn, Dept Psychol, 3815 Walnut St, Philadelphia, PA 19104 USA.	gallabri@sas.upenn.edu	Tsukayama, Eli/K-6653-2019; Langer, Daniel/B-7307-2014	Langer, Daniel/0000-0001-8738-9482; Wood, Jeffrey/0000-0002-0759-6156					68	79	100	3	94	PERGAMON-ELSEVIER SCIENCE LTD	OXFORD	THE BOULEVARD, LANGFORD LANE, KIDLINGTON, OXFORD OX5 1GB, ENGLAND	0022-4405	1873-3506		J SCHOOL PSYCHOL	J. Sch. Psychol.	JUN	2014	52	3
J	Hughes, JN; Cao, Q				Hughes, Jan N.; Cao, Qian			Trajectories of teacher-student warmth and conflict at the transition to middle school: Effects on academic engagement and achievement	JOURNAL OF SCHOOL PSYCHOLOGY			English	Article						Teacher-student relationship; Middle school; Piece-wise trajectory analysis; Academic engagement; Reading achievement; Math achievement; Teacher warmth; Teacher conflict; Transition to middle school	CHILD RELATIONSHIP QUALITY; DIFFICULTIES QUESTIONNAIRE; ADOLESCENTS PERCEPTIONS; ELEMENTARY-SCHOOL; YOUNG ADOLESCENTS; EMOTIONAL SUPPORT; SOCIAL SUPPORT; CLASSROOM; ENVIRONMENT; RISK	Using piece-wise longitudinal trajectory analysis, this study investigated trajectories of teacher-reported warmth and conflict in their relationships with students 4 years prior to and 3 years following the transition to middle school in a sample of 550 academically at-risk and ethnically diverse adolescents. At the transition to middle school, teacher reports of warmth showed a significant drop…	[Hughes, Jan N.; Cao, Qian] Texas A&M Univ, College Stn, TX 77843 USA	Texas A&M University System; Texas A&M University College Station	Hughes, JN (corresponding author), Texas A&M Univ, College Stn, TX 77843 USA.	jhughes@tamu.edu; caoqian@email.tamu.edu			National Institute of Child Health and Human Development (NICHD) [HD039367]	National Institute of Child Health and Human Development (NICHD)(United States Department of Health & Human ServicesNational Institutes of Health (NIH) - USANIH Eunice Kennedy Shriver National Institute of Child Health & Human Development (NICHD))	This project was funded by National Institute of Child Health and Human Development (NICHD; grant number HD039367) to Jan Hughes and received human subjects approval from Texas A & M University.		98	79	113	3	75	PERGAMON-ELSEVIER SCIENCE LTD	OXFORD	THE BOULEVARD, LANGFORD LANE, KIDLINGTON, OXFORD OX5 1GB, ENGLAND	0022-4405	1873-3506		J SCHOOL PSYCHOL	J. Sch. Psychol.	APR	2018	67
J	DEBARYSHE, BD; PATTERSON, GR; CAPALDI, DM				DEBARYSHE, BD; PATTERSON, GR; CAPALDI, DM			A PERFORMANCE-MODEL FOR ACADEMIC-ACHIEVEMENT IN EARLY ADOLESCENT BOYS	DEVELOPMENTAL PSYCHOLOGY			English	Article							SCHOOL PERFORMANCE; BEHAVIOR; INVOLVEMENT; SAMPLE	This study tests a model for conduct-related school failure in young adolescent boys. In this model, family characteristics and child antisocial behavior serve as predictors of school adjustment and academic performance. Ss were 206 youths and their families, followed from the 4th through 8th grades. Results indicated that low parental academic achievement was associated with ineffective discipli…	OREGON SOCIAL LEARNING CTR, EUGENE, OR USA	Oregon Social Learning Center	UNIV N CAROLINA, DEPT HUMAN DEV & FAMILY STUDIES, GREENSBORO, NC 27412 USA.								52	78	108	1	15	AMER PSYCHOLOGICAL ASSOC	WASHINGTON	750 FIRST ST NE, WASHINGTON, DC 20002-4242 USA	0012-1649	1939-0599		DEV PSYCHOL	Dev. Psychol.	SEP	1993	29	5
J	Dolezal, SE; Welsh, LM; Pressley, M; Vincent, MM				Dolezal, SE; Welsh, LM; Pressley, M; Vincent, MM			How nine third-grade teachers motivate student academic engagement	ELEMENTARY SCHOOL JOURNAL			English	Article							SELF; INSTRUCTION; ACHIEVEMENT	Nine grade 3 teachers in 8 Catholic schools were observed and interviewed, and student work was collected to determine how the teachers motivated students. Engagement varied dramatically between some classes, covarying with motivating elements of instruction. Engaging teachers did much to motivate their students and little that might undermine academic motivation. Teachers were classified into 3 …	Univ Notre Dame, Notre Dame, IN 46556 USA	University of Notre Dame	Michigan State Univ, Coll Educ, Erickson Hall, E Lansing, MI 48824 USA.								75	78	149	0	16	UNIV CHICAGO PRESS	CHICAGO	1427 E 60TH ST, CHICAGO, IL 60637-2954 USA	0013-5984	1554-8279		ELEM SCHOOL J	Elem. Sch. J.	JAN	2003	103	3
J	Galván, A; Spatzier, A; Juvonen, J				Galvan, Adriana; Spatzier, Agnieszka; Juvonen, Jaana			Perceived norms and social values to capture school culture in elementary and middle school	JOURNAL OF APPLIED DEVELOPMENTAL PSYCHOLOGY			English	Article						Peers; Social status; Norms; School culture; Middle school	ANTISOCIAL-BEHAVIOR; ACHIEVEMENT VALUES; ADOLESCENTS; POPULARITY; ADJUSTMENT; PEERS; BOYS; PERCEPTIONS; AGGRESSION; MOTIVATION	The current study was designed to gain insights into shifting school culture by examining perceived peer group norms and social values across elementary and middle school grades. Perceived norms were assessed by asking participants (N = 605) to estimate how many grade mates were academically engaged, disengaged, and antisocial. To capture social values, peer nominations were used to assess coolne…	[Galvan, Adriana] Univ Calif Los Angeles, Dept Psychol, Los Angeles, CA 90095 USA	University of California System; University of California Los Angeles	Galván, A (corresponding author), Univ Calif Los Angeles, Dept Psychol, 1285 Franz Hall,Box 951563, Los Angeles, CA 90095 USA.	agalvan@ucla.edu							48	78	108	1	37	ELSEVIER SCIENCE INC	NEW YORK	STE 800, 230 PARK AVE, NEW YORK, NY 10169 USA	0193-3973	1873-7900		J APPL DEV PSYCHOL	J. Appl. Dev. Psychol.	NOV-DEC	2011	32	6
J	Landau, MJ; Oyserman, D; Keefer, LA; Smith, GC				Landau, Mark J.; Oyserman, Daphna; Keefer, Lucas A.; Smith, George C.			The College Journey and Academic Engagement: How Metaphor Use Enhances Identity-Based Motivation	JOURNAL OF PERSONALITY AND SOCIAL PSYCHOLOGY			English	Article						academic achievement; conceptual metaphor theory; goals; identity-based motivation; possible selves	POSSIBLE SELVES INTERVENTION; INDIVIDUAL-DIFFERENCES; SELF-REGULATION; STUDENTS; GOAL; REPRESENTATIONS; EXPECTATIONS; PERFORMANCE; EXPERIENCES; PSYCHOLOGY	People commonly talk about goals metaphorically as destinations on physical paths extending into the future or as contained in future periods. Does metaphor use have consequences for people's motivation to engage in goal-directed action? Three experiments examine the effect of metaphor use on students' engagement with their academic possible identity: their image of themselves as academically suc…	[Landau, Mark J.; Keefer, Lucas A.] Univ Kansas, Dept Psychol, Lawrence, KS 66045 USA; [Oyserman, Daphna] Univ So Calif, Dept Psychol, Los Angeles, CA 90089 USA; [Smith, George C.] Univ Michigan, Dept Psychol, Ann Arbor, MI 48109 USA	University of Kansas; University of Southern California; University of Michigan System; University of Michigan	Landau, MJ (corresponding author), Univ Kansas, Dept Psychol, 1415 Jayhawk Blvd,Fraser Hall,Room 426, Lawrence, KS 66045 USA.	mjlandau@ku.edu	Oyserman, Daphna/U-3207-2019	Oyserman, Daphna/0000-0002-2727-2167	Direct For Social, Behav & Economic Scie; Division Of Behavioral and Cognitive Sci [1222047] Funding Source: National Science Foundation	Direct For Social, Behav & Economic Scie; Division Of Behavioral and Cognitive Sci(National Science Foundation (NSF)NSF - Directorate for Social, Behavioral & Economic Sciences (SBE))			89	78	102	5	76	AMER PSYCHOLOGICAL ASSOC	WASHINGTON	750 FIRST ST NE, WASHINGTON, DC 20002-4242 USA	0022-3514	1939-1315		J PERS SOC PSYCHOL	J. Pers. Soc. Psychol.	MAY	2014	106	5
J	Elmaadaway, MAN				Elmaadaway, Mohamed Ali Nagy			The effects of a flipped classroom approach on class engagement and skill performance in a Blackboard course	BRITISH JOURNAL OF EDUCATIONAL TECHNOLOGY			English	Article							ACADEMIC ENGAGEMENT	This paper reports on a study that investigated whether a flipped classroom approach enhanced perceptions of levels of engagement and skill performance among students enrolled in a Blackboard course at a Saudi university. Fifty-eight participants were divided into control and experimental groups, which were taught using a traditional and a flipped approach respectively. To determine the effect of…	[Elmaadaway, Mohamed Ali Nagy] King Saud Univ, Sci Res, POB 2454, Riyadh 11451, Saudi Arabia; [Elmaadaway, Mohamed Ali Nagy] Kafr El Sheikh Univ, Fac Specif Edu, Dept Educ Technol, Kafr Al Sheikh, Egypt	King Saud University; Egyptian Knowledge Bank (EKB); Kafrelsheikh University	Elmaadaway, MAN (corresponding author), King Saud Univ, Sci Res, POB 2454, Riyadh 11451, Saudi Arabia.	prof_nagy@yahoo.com	nagy, mohamed/GVT-7750-2022	Nagy Elmaadaway, Mohamed Ali/0000-0001-7532-3427	Deanship of Scientific Research at King Saud University [RG-1435-061]	Deanship of Scientific Research at King Saud University(King Saud University)	The author extends his sincere appreciation to the Deanship of Scientific Research at King Saud University for funding this research under grant number RG-1435-061.		35	78	89	8	98	WILEY	HOBOKEN	111 RIVER ST, HOBOKEN 07030-5774, NJ USA	0007-1013	1467-8535		BRIT J EDUC TECHNOL	Br. J. Educ. Technol.	MAY	2018	49	3
J	Sadoughi, M; Hejazi, SY				Sadoughi, Majid; Hejazi, S. Yahya			Teacher support and academic engagement among EFL learners: The role of positive academic emotions	STUDIES IN EDUCATIONAL EVALUATION			English	Article						Academic engagement; Teacher support; Positive academic emotions; English as a Foreign Language (EFL)	CLASSROOM SOCIAL-ENVIRONMENT; STUDENT ENGAGEMENT; SCHOOL ENGAGEMENT; SELF-EFFICACY; ADOLESCENTS PERCEPTIONS; AUTONOMY SUPPORT; MEDIATING ROLE; ACHIEVEMENT; MOTIVATION; MIDDLE	Academic engagement and teacher support, as two important factors in education, have been largely neglected in the research literature of English as a Foreign Language (EFL) and applied linguistics. Given the facilitative role of positive emotions in learning processes, this study aimed to examine their mediating role in the relationship between teacher support and academic engagement among Irani…	[Sadoughi, Majid] Univ Kashan, Fac Humanities, Psychol Dept, Kashan, Iran; [Hejazi, S. Yahya] Univ Tehran, Fac Foreign Languages & Literature, English Dept, Tehran, Iran	University Kashan; University of Tehran	Sadoughi, M (corresponding author), Univ Kashan, Fac Humanities, Psychol Dept, Kashan, Iran.	sadoughi@kashanu.ac.ir; s.yahya.hejazi@ut.ac.ir	Hejazi, S. Yahya/IZD-4792-2023; Hejazi, S. Yahya/AAX-4927-2020; Sadoughi, Majid/T-3986-2017	Hejazi, S. Yahya/0000-0002-4213-3659; Hejazi, S. Yahya/0000-0002-4213-3659; Sadoughi, Majid/0000-0002-6439-6513					105	78	79	117	349	ELSEVIER	AMSTERDAM	RADARWEG 29, 1043 NX AMSTERDAM, NETHERLANDS	0191-491X			STUD EDUC EVAL	Stud. Educ. Eval.	SEP	2021	70
J	Oriel, KN; George, CL; Peckus, R; Semon, A				Oriel, Kathryn N.; George, Cheryl L.; Peckus, Rebecca; Semon, Amanda			The Effects of Aerobic Exercise on Academic Engagement in Young Children With Autism Spectrum Disorder	PEDIATRIC PHYSICAL THERAPY			English	Article						aerobic exercise; attention; autism spectrum disorder; child; educational activities; physical therapy/methods; special education; stereotypic movement disorder/therapy	SELF-STIMULATORY BEHAVIOR; STEREOTYPIC BEHAVIORS; PHYSICAL EXERCISE; CLASSROOMS; STUDENTS	Purpose: To determine whether participation in aerobic exercise before classroom activities improves academic engagement and reduces stereotypic behaviors in young children with autism spectrum disorder. Methods: This study employed a within-subjects crossover design, using a treatment condition (aerobic exercise) and a control condition, across 4 classrooms. The treatment condition included 15 m…	[Oriel, Kathryn N.; George, Cheryl L.; Peckus, Rebecca; Semon, Amanda] Lebanon Valley Coll, Dept Phys Therapy, Annville, PA 17003 USA		Oriel, KN (corresponding author), Lebanon Valley Coll, Dept Phys Therapy, 101 N Coll Ave, Annville, PA 17003 USA.	oriel@lvc.edu			PLEET through Lebanon Valley College	PLEET through Lebanon Valley College	Grant Support: This study was funded by the PLEET Grant through Lebanon Valley College.		24	77	109	4	89	LIPPINCOTT WILLIAMS & WILKINS	PHILADELPHIA	TWO COMMERCE SQ, 2001 MARKET ST, PHILADELPHIA, PA 19103 USA	0898-5669	1538-005X		PEDIATR PHYS THER	Pediatr. Phys. Ther.	SUM	2011	23	2
J	Cesaroni, F; Piccaluga, A				Cesaroni, Fabrizio; Piccaluga, Andrea			The activities of university knowledge transfer offices: towards the third mission in Italy	JOURNAL OF TECHNOLOGY TRANSFER			English	Article						Knowledge transfer; Knowledge transfer offices; Academic engagement; University third mission; Entrepreneurial university; University-industry collaboration	RESEARCH-AND-DEVELOPMENT; TECHNOLOGY-TRANSFER; INTELLECTUAL PROPERTY; INDUSTRY LINKAGES; ACADEMIC RESEARCH; COMMERCIALIZATION; ENTREPRENEURIAL; POLICY; PERFORMANCE; GOVERNANCE	Establishing deeper engagement with industry and society has recently become a key concern of universities. To pursue this goal, universities-as well as other public research organizations-have started to reorganize internal resources, to redefine their activities and policies, and to redesign their overall knowledge transfer (KT) business models. As a consequence, in several countries a wide het…	[Cesaroni, Fabrizio] Univ Messina, Dept Business Econ & Management SEAM, Piazza Pugliatti 1, I-98122 Messina, Italy; [Cesaroni, Fabrizio; Piccaluga, Andrea] Scuola Super Sant Anna, Ist Management, Piazza Martiri Liberta 33, I-56127 Pisa, Italy	University of Messina; Scuola Superiore Sant'Anna	Cesaroni, F (corresponding author), Univ Messina, Dept Business Econ & Management SEAM, Piazza Pugliatti 1, I-98122 Messina, Italy.;Cesaroni, F (corresponding author), Scuola Super Sant Anna, Ist Management, Piazza Martiri Liberta 33, I-56127 Pisa, Italy.	fabrizio.cesaroni@unime.it; a.piccaluga@sssup.it	Cesaroni, Fabrizio/AAN-7415-2020	Cesaroni, Fabrizio/0000-0002-2345-6225					53	77	83	5	141	SPRINGER	NEW YORK	233 SPRING ST, NEW YORK, NY 10013 USA	0892-9912	1573-7047		J TECHNOL TRANSFER	J. Technol. Transf.	AUG	2016	41	4
J	Linnenbrink-Garcia, L; Wormington, SV; Snyder, KE; Riggsbee, J; Perez, T; Ben-Eliyahu, A; Hill, NE				Linnenbrink-Garcia, Lisa; Wormington, Stephanie V.; Snyder, Kate E.; Riggsbee, Jan; Perez, Tony; Ben-Eliyahu, Adar; Hill, Nancy E.			Multiple Pathways to Success: An Examination of Integrative Motivational Profiles Among Upper Elementary and College Students	JOURNAL OF EDUCATIONAL PSYCHOLOGY			English	Article						motivation; person-oriented; achievement goals; perceived competence; task value	EXPECTANCY-VALUE THEORY; PERFORMANCE-APPROACH GOALS; PERSON-CENTERED APPROACH; EXTRINSIC MOTIVATIONS; INTRINSIC MOTIVATION; PERCEIVED COMPETENCE; ACHIEVEMENT GOALS; ORIENTED APPROACH; SELF-REGULATION; VALUES	Two studies were conducted with distinct samples to investigate how motivational beliefs cohere and function together (i.e., motivational profiles) and predict academic adjustment. Integrating across motivational theories, participants (N-Study (1) = 160 upper elementary students; N-Study 2 = 325 college students) reported on multiple types of motivation (achievement goals, task value, perceived …	[Linnenbrink-Garcia, Lisa] Michigan State Univ, Dept Counseling Educ Psychol & Special Educ, 620 Farm Lane,Room 513E Erickson Hall, E Lansing, MI 48824 USA; [Wormington, Stephanie V.] Univ Virginia, Ctr Adv Study Teaching & Learning, Charlottesville, VA 22903 USA; [Snyder, Kate E.] Univ Louisville, Dept Counseling & Human Dev, Louisville, KY 40292 USA; [Riggsbee, Jan] Duke Univ, Program Educ, Dur…	Michigan State University; University of Virginia; University of Louisville; Duke University; Old Dominion University; University of Haifa; Harvard University	Linnenbrink-Garcia, L (corresponding author), Michigan State Univ, Dept Counseling Educ Psychol & Special Educ, 620 Farm Lane,Room 513E Erickson Hall, E Lansing, MI 48824 USA.	llgarcia@msu.edu	Perez, Tony/ABE-2674-2020		National Institute of General Medical Sciences of the National Institutes of Health [5R01GM094534]; Faculty Research Leave Grant from the Duke Talent Identification Program	National Institute of General Medical Sciences of the National Institutes of Health(United States Department of Health & Human ServicesNational Institutes of Health (NIH) - USANIH National Institute of General Medical Sciences (NIGMS)); Faculty Research Leave Grant from the Duke Talent Identification Program	Earlier versions of portions of this article were presented at the annual meeting of the American Educational Research Association, April 2012, Vancouver, BC, Canada, and the International Conference on Motivation, June 2014, Finland. The research reported in this article was supported by a grant from the National Institute of General Medical Sciences of the National Institutes of Health under aw…		102	77	97	4	46	AMER PSYCHOLOGICAL ASSOC	WASHINGTON	750 FIRST ST NE, WASHINGTON, DC 20002-4242 USA	0022-0663	1939-2176		J EDUC PSYCHOL	J. Educ. Psychol.	OCT	2018	110	7
J	Carmona-Halty, MA; Schaufeli, WB; Salanova, M				Carmona-Halty, Marcos A.; Schaufeli, Wilmar B.; Salanova, Marisa			The Utrecht Work Engagement Scale for Students (UWES-9S): Factorial Validity, Reliability, and Measurement Invariance in a Chilean Sample of Undergraduate University Students	FRONTIERS IN PSYCHOLOGY			English	Article						UWES; psychometric analyses; academic engagement; university students; invariance across gender	PSYCHOMETRIC PROPERTIES; BURNOUT; VERSION; PERFORMANCE; VALIDATION; GUIDELINES	This brief report examines the within-network construct validity of the UWES-9S in a convenience sample of 1502 Chilean students (52% were female) ranging between 18 and 25 years old. The results of confirmatory factor analysis supported a solution with three related factors that fit significantly better than a one-factor solution. The three subscales (i.e., vigor, dedication, and absorption) and…	[Carmona-Halty, Marcos A.] Univ Tarapaca, Escuela Psicol & Filosofia, Arica, Chile; [Schaufeli, Wilmar B.] Katholieke Univ Leuven, Res Unit Occupat & Org Psychol & Profess Learning, Leuven, Belgium; [Schaufeli, Wilmar B.] Univ Utrecht, Dept Social Hlth & Org Psychol, Utrecht, Netherlands; [Salanova, Marisa] Univ Jaume 1, WANT Res Team, Castellon De La Plana, Spain	Universidad de Tarapaca; KU Leuven; Utrecht University; Universitat Jaume I	Carmona-Halty, MA (corresponding author), Univ Tarapaca, Escuela Psicol & Filosofia, Arica, Chile.	marcos.carmona.halty@gmail.com	Salanova, Marisa/B-4354-2011; Schaufeli, Wilmar/B-9645-2013	Salanova, Marisa/0000-0001-7873-7078; Schaufeli, Wilmar/0000-0002-6070-7150; Carmona-Halty, Marcos/0000-0003-4475-1175	Ministerio de Economia y Competitividad [PSI2015-64933-R]; Universitat Jaume I [UJI-B2017-81]; Universidad de Tarapaca [UTA Mayor 3749/18]	Ministerio de Economia y Competitividad(Spanish Government); Universitat Jaume I; Universidad de Tarapaca	This work was supported by Ministerio de Economia y Competitividad (Grant No. # PSI2015-64933-R), Universitat Jaume I (Grant No. # UJI-B2017-81), and Universidad de Tarapaca (Grant No. # UTA Mayor 3749/18).		33	77	87	3	36	FRONTIERS MEDIA SA	LAUSANNE	AVENUE DU TRIBUNAL FEDERAL 34, LAUSANNE, CH-1015, SWITZERLAND	1664-1078			FRONT PSYCHOL	Front. Psychol.	APR 30	2019	10
J	Wang, JF; Bu, LR; Li, Y; Song, J; Li, N				Wang, Jinfang; Bu, Lingrui; Li, Yan; Song, Jie; Li, Na			The mediating effect of academic engagement between psychological capital and academic burnout among nursing students during the COVID-19 pandemic: A cross-sectional study	NURSE EDUCATION TODAY			English	Article						Academic burnout; Psychological capital; Academic engagement; COVID-19; Students; nursing	COLLEGE-STUDENTS; OUTCOMES	Background: Almost all universities have been forced to close and change to online teaching during the COVID-19 pandemic, which has been a big challenge for students. There is little knowledge about the academic burnout among nursing students in these difficult circumstances, especially in traditional Chinese medicine universities, and the relationship between the burnout and their psychological …	[Wang, Jinfang; Li, Yan; Song, Jie; Li, Na] Shandong Univ Tradit Chinese Med, Sch Nursing, Jinan, Peoples R China; [Bu, Lingrui] Shandong Lab Vocat & Tech Coll, Dept Informat Engn, Jinan, Peoples R China	Shandong University of Traditional Chinese Medicine	Li, N (corresponding author), 4655 Univ Rd, Jinan, Peoples R China.	lina131468@163.com							39	76	80	13	142	CHURCHILL LIVINGSTONE	EDINBURGH	JOURNAL PRODUCTION DEPT, ROBERT STEVENSON HOUSE, 1-3 BAXTERS PLACE, LEITH WALK, EDINBURGH EH1 3AF, MIDLOTHIAN, SCOTLAND	0260-6917	1532-2793		NURS EDUC TODAY	Nurse Educ. Today	JUL	2021	102
J	Brint, S; Cantwell, AM; Hanneman, RA				Brint, Steven; Cantwell, Allison M.; Hanneman, Robert A.			The two cultures of undergraduate academic engagement	RESEARCH IN HIGHER EDUCATION			English	Article						academic engagement; student cultures; research universities; graduate degree aspirations	EXPERIENCES; FACULTY	Using data on upper-division students in the University of California system, we show that two distinct cultures of engagement exist on campus. The culture of engagement in the arts, humanities and social sciences focuses on interaction, participation, and interest in ideas. The culture of engagement in the natural sciences and engineering focuses on improvement of quantitative skills through col…	[Brint, Steven; Cantwell, Allison M.; Hanneman, Robert A.] Univ Calif Riverside, Dept Sociol, Riverside, CA 92521 USA	University of California System; University of California Riverside	Brint, S (corresponding author), Univ Calif Riverside, Dept Sociol, Riverside, CA 92521 USA.	steven.brint@ucr.edu	Cantwell, Allison/AAJ-4841-2021	Cantwell, Allison/0000-0002-9240-439X					52	74	110	0	39	SPRINGER	NEW YORK	233 SPRING ST, NEW YORK, NY 10013 USA	0361-0365	1573-188X		RES HIGH EDUC	Res. High. Educ.	AUG	2008	49	5
J	Carter, EW; Moss, CK; Hoffman, A; Chung, YC; Sisco, L				Carter, Erik W.; Moss, Colleen K.; Hoffman, Alicia; Chung, Yun-Ching; Sisco, Lynn			Efficacy and Social Validity of Peer Support Arrangements for Adolescents With Disabilities	EXCEPTIONAL CHILDREN			English	Article							HIGH-SCHOOL-STUDENTS; EFFECTIVE INSTRUCTIONAL PRACTICES; GENERAL-EDUCATION CLASSROOMS; INTELLECTUAL DISABILITIES; DEVELOPMENTAL-DISABILITIES; INCLUSIVE EDUCATION; CURRICULUM; ACCESS; INTERVENTIONS; YOUTH	Current research and policy emphasize providing students with severe disabilities with the supports needed to participate socially and academically within inclusive classrooms. The authors examined the efficacy and acceptability of peer support arrangements as an avenue for promoting the participation of 3 students with severe disabilities in high school general education classrooms. In addition,…	[Carter, Erik W.] Vanderbilt Univ, Peabody Coll, Dept Special Educ, Nashville, TN 37203 USA; [Moss, Colleen K.; Chung, Yun-Ching] Univ Wisconsin, Waisman Ctr, Madison, WI 53706 USA; [Hoffman, Alicia] Univ Wisconsin, Dept Educ Psychol, Madison, WI 53706 USA; [Sisco, Lynn] Univ Wisconsin, Sch Social Work, Madison, WI 53706 USA	Vanderbilt University; Vanderbilt University Peabody College; University of Wisconsin System; University of Wisconsin Madison; University of Wisconsin System; University of Wisconsin Madison; University of Wisconsin System; University of Wisconsin Madison	Carter, EW (corresponding author), Vanderbilt Univ, Peabody Coll, Dept Special Educ, Box 228, Nashville, TN 37203 USA.	erik.carter@vanderbilt.edu	Carter, Erik/AAX-3043-2020; Chung, Yun-Ching/AAX-1608-2020	Carter, Erik/0000-0001-7153-2782;					43	74	115	2	32	COUNCIL EXCEPTIONAL CHILDREN	ARLINGTON	1110 N GLEBE RD, ARLINGTON, VA 22201-5704 USA	0014-4029			EXCEPT CHILDREN	Except. Child.	FAL	2011	78	1
J	King, RB; McInerney, DM; Watkins, DA				King, Ronnel Bornasal; McInerney, Dennis M.; Watkins, David A.			Studying for the sake of others: the role of social goals on academic engagement	EDUCATIONAL PSYCHOLOGY			English	Article						social goals; academic engagement; achievement goals	ACHIEVEMENT GOALS; SEX-DIFFERENCES; INTRINSIC MOTIVATION; STUDENTS MOTIVATION; SELF; SCHOOL; ORIENTATIONS; COMPETENCE; AMERICAN; FILIPINO	Much of the research on achievement goal theory has focused on the roles of mastery and performance goals in academic engagement, thus the role of other goals such as social goals has mostly been neglected. The aim of this research was to investigate the effects of different kinds of social goals (affiliation, approval, concern, responsibility and status goals) on the different facets of academic…	[King, Ronnel Bornasal; Watkins, David A.] Univ Hong Kong, Fac Educ, Hong Kong, Hong Kong, Peoples R China; [King, Ronnel Bornasal; McInerney, Dennis M.] Hong Kong Inst Educ, Dept Special Educ & Counselling, Hong Kong, Hong Kong, Peoples R China; [Watkins, David A.] Univ Melbourne, Grad Sch Educ, Melbourne, Vic, Australia	University of Hong Kong; Education University of Hong Kong (EdUHK); University of Melbourne	King, RB (corresponding author), Univ Hong Kong, Fac Educ, Hong Kong, Hong Kong, Peoples R China.	bornasal@ied.edu.hk	King, Ronnel B/AGZ-0675-2022	King, Ronnel B/0000-0003-1723-1748; McInerney, Dennis/0000-0003-1339-1744; KING, Ronnel Bornasal/0000-0002-0648-8508; McInerney, dennis/0000-0002-1108-5770					123	74	80	2	38	ROUTLEDGE JOURNALS, TAYLOR & FRANCIS LTD	ABINGDON	2-4 PARK SQUARE, MILTON PARK, ABINGDON OX14 4RN, OXON, ENGLAND	0144-3410	1469-5820		EDUC PSYCHOL-UK	Educ. Psychol.		2012	32	6
J	McCoy, S; Banks, J				McCoy, Selina; Banks, Joanne			Simply academic? Why children with special educational needs don't like school	EUROPEAN JOURNAL OF SPECIAL NEEDS EDUCATION			English	Article						special educational needs; inclusive education; school engagement; academic engagement; peer relations	STUDENTS; DISABILITIES; ACHIEVEMENT; ADJUSTMENT; INCLUSION; STRENGTHS; BEHAVIOR; IRELAND	International studies have raised concerns about the academic and social implications of inclusive policies on school engagement and successful learning and, in particular, on the ways in which friendships are formed between students with SEN and other students. This article stems from research findings which show that Irish children with special educational needs like school less than their peer…	[McCoy, Selina; Banks, Joanne] Econ & Social Res Inst, Dublin, Ireland	Economic & Social Research Institute (ESRI)	McCoy, S (corresponding author), Econ & Social Res Inst, Dublin, Ireland.	selina.mccoy@esri.ie	Banks, Joanne/B-1073-2019; McCoy, Selina/ABC-9817-2020	Banks, Joanne/0000-0003-2322-662X; McCoy, Selina/0000-0001-8774-4018					71	74	82	1	30	ROUTLEDGE JOURNALS, TAYLOR & FRANCIS LTD	ABINGDON	2-4 PARK SQUARE, MILTON PARK, ABINGDON OX14 4RN, OXON, ENGLAND	0885-6257	1469-591X		EUR J SPEC NEEDS EDU	Eur. J. Spec. Needs Educ.		2012	27	1
J	Morningstar, ME; Lombardi, A; Fowler, CH; Test, DW				Morningstar, Mary E.; Lombardi, Allison; Fowler, Catherine H.; Test, David W.			A College and Career Readiness Framework for Secondary Students With Disabilities	CAREER DEVELOPMENT AND TRANSITION FOR EXCEPTIONAL INDIVIDUALS			English	Article						academic; non-academic; students with disabilities; college career readiness; transition	TRANSITION; EDUCATION; SCHOOL; ENGAGEMENT; IMPACT	In this qualitative study, a proposed organizing framework of college and career readiness for secondary students with disabilities was developed based on a synthesis of extant research articulating student success. The original proposed framework included six domains representing academic and nonacademic skills associated with college and career readiness: academic engagement, academic mind-sets…	[Morningstar, Mary E.] Univ Kansas, Lawrence, KS 66045 USA; [Lombardi, Allison] Univ Connecticut, Storrs, CT USA; [Fowler, Catherine H.; Test, David W.] Univ N Carolina, Charlotte, NC USA	University of Kansas; University of Connecticut; University of North Carolina; University of North Carolina Charlotte	Morningstar, ME (corresponding author), Univ Kansas, Dept Special Educ, Rm 521 JR Pearson Hall,1122 W Campus Rd, Lawrence, KS 66045 USA.	mmorningstar@ku.edu							39	74	95	1	26	SAGE PUBLICATIONS INC	THOUSAND OAKS	2455 TELLER RD, THOUSAND OAKS, CA 91320 USA	2165-1434	2165-1442		CAREER DEV TRANSIT E	Career Dev. Transit. Except. Individ.	MAY	2017	40	2
J	Giangreco, MF				Giangreco, Michael F.			One-to-One Paraprofessionals for Students With Disabilities in Inclusive Classrooms: Is Conventional Wisdom Wrong?	INTELLECTUAL AND DEVELOPMENTAL DISABILITIES			English	Article							INCREASING PEER INTERACTIONS; GENERAL-EDUCATION CLASSES; ACADEMIC ENGAGEMENT; SERVICE DELIVERY; SUPPORT; SCHOOL; PARAEDUCATORS; EXPERIENCES; ASSISTANTS; SETTINGS	Assigning one-to-one paraprofessionals has become an increasingly common response to support students with intellectual and other developmental disabilities in general education classrooms. This article challenges the conventional wisdom that such an approach to service provision is necessarily a desirable and supportive action. Five main reasons are presented that challenge overreliance on the u…	Univ Vermont, Ctr Disabil & Community Inclus, Burlington, VT 05405 USA	University of Vermont	Giangreco, MF (corresponding author), Univ Vermont, Ctr Disabil & Community Inclus, 208 Colchester Ave, Burlington, VT 05405 USA.	Michael.Giangreco@uvm.edu	Giangreco, Michael F./ABA-7909-2021	Giangreco, Michael F./0000-0002-7165-0217					67	73	131	2	27	AMER ASSOC INTELLECTUAL DEVELOPMENTAL DISABILITIES	WASHINGTON	444 N CAPITOL ST, NW STE 846, WASHINGTON, DC 20001-1512 USA	1934-9491			INTELLECT DEV DISAB	Intellect. Dev. Disabil.	FEB	2010	48	1
J	Tartari, V; Salter, A				Tartari, Valentina; Salter, Ammon			The engagement gap: Exploring gender differences in University - Industry collaboration activities	RESEARCH POLICY			English	Article						Gender; Academic-engagement with industry; University-industry collaboration; Marginality; Women in science; Semi-parametric matching	RESEARCH PRODUCTIVITY; AFFIRMATIVE-ACTION; LIFE; SCIENCE; SCIENTISTS; ENTREPRENEURS; FACULTY; WOMEN; SEX; PERFORMANCE	In recent years, the debate about the marginality of women in academic science has been extended to academics' engagement with industry and their commercial efforts. Analyzing multi-source data for a large sample of UK physical and engineering scientists and employing a matching technique, this study suggests women academics to engage less and in different ways than their male colleagues of simil…	[Tartari, Valentina] Copenhagen Business Sch, Dept Innovat, Org Econ, Copenhagen, Denmark; [Salter, Ammon] Univ Bath, Sch Management, Bath BA2 7AY, Avon, England	Copenhagen Business School; University of Bath	Salter, A (corresponding author), Univ Bath, Sch Management, Bath BA2 7AY, Avon, England.	a.j.salter@bath.ac.uk	Tartari, Valentina/ABB-4882-2021; Salter, Ammon/A-9217-2010	Tartari, Valentina/0000-0001-7332-8590; Salter, Ammon/0000-0003-2065-1268	UK's Engineering and Physical Sciences Research Council [EP/F036930/1]; Economic and Social Research Council (ESRC) [ES/K001159/1]; UK Innovation Research Centre - ESRC [RES/G028591/1]; National Endowment for Science, Technology and the Arts; Department for Business, Innovation and Skills; Technology Strategy Board; EPSRC [EP/F036930/1] Funding Source: UKRI; ESRC [ES/G042993/1, ES/K001159/1] Fund…	UK's Engineering and Physical Sciences Research Council(UK Research & Innovation (UKRI)Engineering & Physical Sciences Research Council (EPSRC)); Economic and Social Research Council (ESRC)(UK Research & Innovation (UKRI)Economic & Social Research Council (ESRC)); UK Innovation Research Centre - ESRC(UK Research & Innovation (UKRI)Economic & Social Research Council (ESRC)); National Endowment for…	Ammon Salter and Valentina Tartari would like to acknowledge the support of the UK's Engineering and Physical Sciences Research Council (EP/F036930/1), Economic and Social Research Council (ESRC)(ES/K001159/1) and the UK Innovation Research Centre (RES/G028591/1), which was sponsored by the ESRC; the National Endowment for Science, Technology and the Arts; the Department for Business, Innovation …		84	73	82	4	87	ELSEVIER	AMSTERDAM	RADARWEG 29, 1043 NX AMSTERDAM, NETHERLANDS	0048-7333	1873-7625		RES POLICY	Res. Policy	JUL	2015	44	6
J	Grieco, LA; Jowers, EM; Errisuriz, VL; Bartholomew, JB				Grieco, Lauren A.; Jowers, Esbelle M.; Errisuriz, Vanessa L.; Bartholomew, John B.			Physically active vs. sedentary academic lessons: A dose response study for elementary student time on task	PREVENTIVE MEDICINE			English	Article						Elementary school; Academic engagement; Child; Physical activity	INTERVENTION; EXERCISE; CHILDREN	Background. Physically active academic lessons are an effective intervention to reduce sedentary time and increase student physical activity. They have also been shown to enhance task engagement, as indicated by observations of attention and behavior control, time on task (TOT). However, it is not clear if the improved TOT stems fromthe physical activity or if it is the result of an enjoyable bre…	[Grieco, Lauren A.; Jowers, Esbelle M.; Errisuriz, Vanessa L.; Bartholomew, John B.] Univ Texas Austin, Dept Kinesiol & Hlth Educ, 2109 San Jacinto Blvd,Mail Stop D3700, Austin, TX 78712 USA	University of Texas System; University of Texas Austin	Bartholomew, JB (corresponding author), Univ Texas Austin, Dept Kinesiol & Hlth Educ, 2109 San Jacinto Blvd,Mail Stop D3700, Austin, TX 78712 USA.	jbart@austin.utexas.edu		Bartholomew, John/0000-0002-3963-0195; Errisuriz, Vanessa/0000-0001-6930-0763	National Institute of Diabetes and Digestive and Kidney Diseases of the National Institutes of Health [R21DK071975]	National Institute of Diabetes and Digestive and Kidney Diseases of the National Institutes of Health(United States Department of Health & Human ServicesNational Institutes of Health (NIH) - USANIH National Institute of Diabetes & Digestive & Kidney Diseases (NIDDK))	Research reported in this publication was supported by the National Institute of Diabetes and Digestive and Kidney Diseases of the National Institutes of Health under award number: R21DK071975. The content is solely the responsibility of the authors and does not necessarily represent the official views of the National Institutes of Health.		39	73	87	1	31	ACADEMIC PRESS INC ELSEVIER SCIENCE	SAN DIEGO	525 B ST, STE 1900, SAN DIEGO, CA 92101-4495 USA	0091-7435	1096-0260		PREV MED	Prev. Med.	AUG	2016	89
J	Zhoc, KCH; Webster, BJ; King, RB; Li, JCH; Chung, TSH				Zhoc, Karen C. H.; Webster, Beverley J.; King, Ronnel B.; Li, Johnson C. H.; Chung, Tony S. H.			Higher Education Student Engagement Scale (HESES): Development and Psychometric Evidence	RESEARCH IN HIGHER EDUCATION			English	Article						Student engagement; Higher education; National Survey of Student Engagement (NSSE); Confirmatory factor analysis (CFA); Factor structure; Measurement	FIT INDEXES; INFORMATION-TECHNOLOGY; EMOTIONAL INTELLIGENCE; SCHOOL; SELF; EXPERIENCES; VALIDITY; OUTCOMES	This study describes the development and validation of the Higher Education Student Engagement Scale (HESES). The psychometric evaluations of the scale included: (i) factor structure, (ii) internal consistency, and (iii) criterion validity. The HESES was developed based on our proposed five-factor model of student engagement, which was evolved from Finn and Zimmer's ( In: Christenson SL, Reschly …	[Zhoc, Karen C. H.; King, Ronnel B.] Educ Univ Hong Kong, Fac Educ & Human Dev, Dept Curriculum & Instruct, Hong Kong, Peoples R China; [Webster, Beverley J.] RMIT Univ, Ho Chi Minh City, Vietnam; [Li, Johnson C. H.] Univ Manitoba, Dept Psychol, Winnipeg, MB, Canada; [Chung, Tony S. H.] Govt Hong Kong Special Adm Reg, Census & Stat Dept, Hong Kong, Peoples R China	Education University of Hong Kong (EdUHK); Royal Melbourne Institute of Technology (RMIT); University of Manitoba	Zhoc, KCH (corresponding author), Educ Univ Hong Kong, Fac Educ & Human Dev, Dept Curriculum & Instruct, Hong Kong, Peoples R China.	chzhoc@eduhk.hk	King, Ronnel B/AGZ-0675-2022; Zhoc, Karen CH/ITV-4083-2023	King, Ronnel B/0000-0003-1723-1748; KING, Ronnel Bornasal/0000-0002-0648-8508					80	73	95	8	118	SPRINGER	NEW YORK	ONE NEW YORK PLAZA, SUITE 4600, NEW YORK, NY, UNITED STATES	0361-0365	1573-188X		RES HIGH EDUC	Res. High. Educ.	MAR	2019	60	2
J	Gest, SD; Rulison, KL; Davidson, AJ; Welsh, JA				Gest, Scott D.; Rulison, Kelly L.; Davidson, Alice J.; Welsh, Janet A.			A reputation for success (or failure): The association of peer academic reputations with academic self-concept, effort, and performance across the upper elementary grades	DEVELOPMENTAL PSYCHOLOGY			English	Article						peer reputation; academic self-concept; academic achievement	ACHIEVEMENT; COMPETENCE; CHILDREN; BEHAVIOR; PERCEPTIONS; EXPERIENCES; VALIDATION; ADJUSTMENT; MOTIVATION; MODELS	The associations between children's academic reputations among peers and their academic self-concept, effort, and performance were examined in a longitudinal study of 427 students initially enrolled in Grades 3, 4, and 5. Assessments were completed in the fall and spring of 2 consecutive school years and in the fall of a 3rd school year. Peer academic reputation (PAR) correlated moderately strong…	[Gest, Scott D.; Rulison, Kelly L.; Davidson, Alice J.] Penn State Univ, Human Dev & Family Studies, University Pk, PA 16802 USA; [Welsh, Janet A.] Penn State Univ, Prevent Res Ctr, University Pk, PA 16802 USA	Pennsylvania Commonwealth System of Higher Education (PCSHE); Pennsylvania State University; Pennsylvania State University - University Park; Pennsylvania Commonwealth System of Higher Education (PCSHE); Pennsylvania State University; Pennsylvania State University - University Park	Gest, SD (corresponding author), Penn State Univ, Human Dev & Family Studies, 110 Henderson S Bldg, University Pk, PA 16802 USA.	gest@psu.edu							62	72	108	3	23	AMER PSYCHOLOGICAL ASSOC	WASHINGTON	750 FIRST ST NE, WASHINGTON, DC 20002-4242 USA	0012-1649	1939-0599		DEV PSYCHOL	Dev. Psychol.	MAY	2008	44	3
J	Nasir, NS; McLaughlin, MW; Jones, A				Nasir, Na'ilah Suad; McLaughlin, Milbrey W.; Jones, Amina			What Does It Mean to Be African American? Constructions of Race and Academic Identity in an Urban Public High School	AMERICAN EDUCATIONAL RESEARCH JOURNAL			English	Article						African American students; racial identity; urban schools	RACIAL IDENTITY; DISCRIMINATION; ADOLESCENTS	In this article, the authors explore variation in the meanings of racial identity for African American students in a predominantly African American urban high school. They view racial identity as both related to membership in a racial group and as fluid and reconstructed in the local school setting. They draw on both survey data and observational data to examine the nature of racial identity mean…	[McLaughlin, Milbrey W.; Jones, Amina] Stanford Univ, Sch Educ, CERAS, Stanford, CA 94305 USA	Stanford University	Nasir, NS (corresponding author), Univ Calif Berkeley, Grad Sch Educ, Educ & African Amer Studies, Tolman Hall, Berkeley, CA 94720 USA.	nailahs@berkeley.edu; Milbrey@stanford.edu; Amina.jones@stanford.edu							59	72	203	0	16	SAGE PUBLICATIONS INC	THOUSAND OAKS	2455 TELLER RD, THOUSAND OAKS, CA 91320 USA	0002-8312	1935-1011		AM EDUC RES J	Am. Educ. Res. J.	MAR	2009	46	1
J	Hill, JP				Hill, Jonathan P.			Faith and Understanding: Specifying the Impact of Higher Education on Religious Belief	JOURNAL FOR THE SCIENTIFIC STUDY OF RELIGION			English	Article						higher education; super-empirical beliefs; university faculty; identity development	COLLEGE-STUDENTS; DELINQUENCY	This study examines the impact of educational enrollment and attainment on several measures of religious belief using nationally representative panel data. Although college does not appear to substantially alter the religious beliefs of most emerging adults, findings do reveal a modest increase in skepticism toward super-empirical religious beliefs among college students and graduates compared to…	Calvin Coll, Dept Sociol & Social Work, Grand Rapids, MI 49546 USA	Calvin University	Hill, JP (corresponding author), Calvin Coll, Dept Sociol & Social Work, 3201 Burton SE, Grand Rapids, MI 49546 USA.	jph27@calvin.edu							73	72	112	1	48	WILEY	HOBOKEN	111 RIVER ST, HOBOKEN 07030-5774, NJ USA	0021-8294	1468-5906		J SCI STUD RELIG	J. Sci. Stud. Relig.	SEP	2011	50	3
J	Knifsend, CA; Graham, S				Knifsend, Casey A.; Graham, Sandra			Too Much of a Good Thing? How Breadth of Extracurricular Participation Relates to School-Related Affect and Academic Outcomes During Adolescence	JOURNAL OF YOUTH AND ADOLESCENCE			English	Article						Extracurricular participation; School belonging; Academic engagement; Academic achievement; Adolescence	AFRICAN-AMERICAN; ENGAGEMENT; NEED	Although adolescents often participate in multiple extracurricular activities, little research has examined how the breadth of activities in which an adolescent is involved relates to school-related affect and academic performance. Relying on a large, multi-ethnic sample (N = 864; 55.9% female), the current study investigated linear and non-linear relationships of 11th grade activity participatio…	[Knifsend, Casey A.] Univ Calif Los Angeles, Dept Psychol, Los Angeles, CA 90095 USA; [Graham, Sandra] Univ Calif Los Angeles, Dept Educ, Los Angeles, CA 90095 USA	University of California System; University of California Los Angeles; University of California System; University of California Los Angeles	Knifsend, CA (corresponding author), Univ Calif Los Angeles, Dept Psychol, 1285 Franz Hall, Los Angeles, CA 90095 USA.	cknifsend@ucla.edu							28	72	168	1	38	SPRINGER/PLENUM PUBLISHERS	NEW YORK	233 SPRING ST, NEW YORK, NY 10013 USA	0047-2891	1573-6601		J YOUTH ADOLESCENCE	J. Youth Adolesc.	MAR	2012	41	3
J	Clark, CR; Mercer, SH; Zeigler-Hill, V; Dufrene, BA				Clark, Chelsi R.; Mercer, Sterett H.; Zeigler-Hill, Virgil; Dufrene, Brad A.			Barriers to the Success of Ethnic Minority Students in School Psychology Graduate Programs	SCHOOL PSYCHOLOGY REVIEW			English	Article							RACIAL MICROAGGRESSIONS; DEPRESSIVE SYMPTOMS; DIFFICULT DIALOGUES; FIT INDEXES; AMERICAN; RACE; DISCRIMINATION; ENGAGEMENT; AUTONOMY; STRESS	The current study examined factors that may serve as barriers to the success of ethnic minority graduate students by assessing the academic, social, and emotional experiences of approximately 87 ethnic minority and 313 ethnic majority school psychology graduate students. Results indicated that ethnic minority graduate students reported significantly more negative race-related experiences, which w…	[Clark, Chelsi R.; Dufrene, Brad A.] Univ So Mississippi, Dept Psychol, Hattiesburg, MS 39406 USA; [Mercer, Sterett H.] Univ British Columbia, Dept Educ & Counselling Psychol & Special Educ, Vancouver, BC V5Z 1M9, Canada; [Zeigler-Hill, Virgil] Oakland Univ, Dept Psychol, Rochester, MI USA	University of Southern Mississippi; University of British Columbia; Oakland University	Mercer, SH (corresponding author), 2125 Main Mall, Vancouver, BC V6T 1Z4, Canada.	sterett.mercer@ubc.ca	Mercer, Sterett H./H-4521-2019	Mercer, Sterett H./0000-0002-7940-4221					77	72	181	0	19	TAYLOR & FRANCIS INC	PHILADELPHIA	530 WALNUT STREET, STE 850, PHILADELPHIA, PA 19106 USA		2372-966X		SCHOOL PSYCHOL REV	Sch. Psychol. Rev.	JUN	2012	41	2
J	Datu, JAD; Yuen, M; Chen, GW				Datu, Jesus Alfonso D.; Yuen, Mantak; Chen, Gaowei			The Triarchic Model of Grit Is Linked to Academic Success and Well-Being Among Filipino High School Students	SCHOOL PSYCHOLOGY QUARTERLY			English	Article						academic engagement; motivation; grit; well-being	SELF; SCALE; ACHIEVEMENT; VALIDATION; MOTIVATION; PERSEVERANCE; PERSONALITY; ENGAGEMENT; CULTURE; EMOTION	Previous investigations mostly relied on the two-factor model of grit (with perseverance of effort and consistency of interests as major dimensions) which received a number criticisms in the extant literature. Recent studies have provided promising lines of evidence regarding the triarchic model of grit (TMG) which posits three dimensions of grit in a collectivist setting: perseverance of effort,…	[Datu, Jesus Alfonso D.] Univ Hong Kong, Ctr Adv Inclus & Special Educ, Div Learning Dev & Divers, Hong Kong, Hong Kong, Peoples R China; [Yuen, Mantak] Univ Hong Kong, Ctr Adv Inclus & Special Educ, Hong Kong, Hong Kong, Peoples R China; [Chen, Gaowei] Univ Hong Kong, Div Learning Dev & Divers, Hong Kong, Hong Kong, Peoples R China; [Datu, Jesus Alfonso D.] Educ Univ Hong Kong, Dept Special Educ…	University of Hong Kong; University of Hong Kong; University of Hong Kong; Education University of Hong Kong (EdUHK)	Datu, JAD (corresponding author), Univ Hong Kong, Ctr Adv Inclus & Special Educ, Div Learning Dev & Divers, Hong Kong, Hong Kong, Peoples R China.;Datu, JAD (corresponding author), Educ Univ Hong Kong, Dept Special Educ & Counselling, 10 Lo Ping Rd, Tai Po, Hong Kong, Peoples R China.	jadatu@eduhk.hk	Yuen, Man Tak/A-3203-2010	Datu, Jesus Alfonso/0000-0002-8790-1113					45	72	82	3	75	AMER PSYCHOLOGICAL ASSOC	WASHINGTON	750 FIRST ST NE, WASHINGTON, DC 20002-4242 USA	1045-3830	1939-1560		SCHOOL PSYCHOL QUART	Sch. Psychol. Q.	SEP	2018	33	3
J	DISHION, TJ; DUNCAN, TE; EDDY, JM; FAGOT, BI; FETROW, R				DISHION, TJ; DUNCAN, TE; EDDY, JM; FAGOT, BI; FETROW, R			THE WORLD OF PARENTS AND PEERS - COERCIVE EXCHANGES AND CHILDRENS SOCIAL ADAPTATION	SOCIAL DEVELOPMENT			English	Article						ANTISOCIAL BEHAVIOR; COERCION; PEER RELATIONS	BEHAVIOR; SCHOOL; PERSPECTIVE; DELINQUENCY; ANTECEDENTS; FAMILY	The relation among child antisocial behavior, child coercive exchanges with parents and peers, and the social adaptation of middle-childhood-aged boys and girls was investigated. The 374 children were observed during laboratory tasks with their parents and during recess with peers. A covariance model was tested that hypothesized that coercive exchanges with parents and peers would contribute uniq…			DISHION, TJ (corresponding author), OREGON SOCIAL LEARNING CTR,207 E 5TH AVE,SUITE 202,EUGENE,OR 97401, USA.								32	71	92	0	11	BLACKWELL PUBL LTD	OXFORD	108 COWLEY RD, OXFORD, OXON, ENGLAND OX4 1JF	0961-205X			SOC DEV	Soc. Dev.		1994	3	3
J	Simons-Morton, BG				Simons-Morton, BG			The protective effect of parental expectations against early adolescent smoking initiation	HEALTH EDUCATION RESEARCH			English	Article							CIGARETTE-SMOKING; SUBSTANCE USE; START SMOKING; PREDICTORS; SCHOOL; BEHAVIORS; CHILDREN; ALCOHOL; MODEL; RISK	Substantial research and theory suggests that smoking initiation is socially mediated, with both peers and parents playing important roles. To learn more about how parenting behaviors influence smoking initiation, students (n = 1002) from four middle schools were surveyed at the beginning of the sixth grade (T1), and the end of the sixth (T2) and seventh (T3) grades. T1 and T2 - T1 predictors wer…	NICHHD, Div Epidemiol Stat & Prevent Res, Prevent Res Branch, NIH, Rockville, MD 20852 USA	National Institutes of Health (NIH) - USA; NIH Eunice Kennedy Shriver National Institute of Child Health & Human Development (NICHD)	NICHHD, Div Epidemiol Stat & Prevent Res, Prevent Res Branch, NIH, Rockville, MD 20852 USA.	MORTONB@exchange.nih.gov		Simons-Morton, Bruce/0000-0003-1099-6617	NICHD NIH HHS [N01-HD-4-3207] Funding Source: Medline	NICHD NIH HHS(United States Department of Health & Human ServicesNational Institutes of Health (NIH) - USANIH Eunice Kennedy Shriver National Institute of Child Health & Human Development (NICHD))			32	71	91	0	15	OXFORD UNIV PRESS	OXFORD	GREAT CLARENDON ST, OXFORD OX2 6DP, ENGLAND	0268-1153	1465-3648		HEALTH EDUC RES	Health Educ. Res.	OCT	2004	19	5
J	Espelage, DL; Hong, JS; Rao, MA; Low, S				Espelage, Dorothy L.; Hong, Jun Sung; Rao, Mrinalini A.; Low, Sabina			Associations Between Peer Victimization and Academic Performance	THEORY INTO PRACTICE			English	Article							MIDDLE SCHOOL; ADJUSTMENT; HARASSMENT; REJECTION; ACHIEVEMENT; AGGRESSION; FRIENDSHIP; PARTICIPATION; MODERATORS; VIOLENCE	This article reviews the extant literature on the links between peer victimization and academic performance and engagement among children and adolescents. Although most of the research on this association is based on cross-sectional investigations, research using longitudinal designs is starting to point to the fact that peer victimization does impact changes in academic performance over time. Th…	[Espelage, Dorothy L.; Rao, Mrinalini A.] Univ Illinois, Champaign, IL 61820 USA; [Hong, Jun Sung] Wayne State Univ, Detroit, MI 48202 USA; [Hong, Jun Sung] Univ Illinois, Sch Social Work, Champaign, IL 61820 USA; [Low, Sabina] Arizona State Univ, Tempe, AZ USA	University of Illinois System; University of Illinois Urbana-Champaign; Wayne State University; University of Illinois System; University of Illinois Urbana-Champaign; Arizona State University; Arizona State University-Tempe	Espelage, DL (corresponding author), Univ Illinois, Dept Educ Psychol, 226 Educ Bldg, Champaign, IL 61820 USA.	espelage@illinois.edu	Berger, Emily/N-7268-2017; Hong, Jun Sung/HOI-0241-2023	Berger, Emily/0000-0001-5550-807X; Hong, Jun Sung/0000-0003-2816-9900					49	71	102	2	43	ROUTLEDGE JOURNALS, TAYLOR & FRANCIS LTD	ABINGDON	2-4 PARK SQUARE, MILTON PARK, ABINGDON OX14 4RN, OXON, ENGLAND	0040-5841	1543-0421		THEOR PRACT	Theory Pract.		2013	52	4
J	Maulana, R; Helms-Lorenz, M; van de Grift, W				Maulana, Ridwan; Helms-Lorenz, Michelle; van de Grift, Wim			Development and evaluation of a questionnaire measuring pre-service teachers' teaching behaviour: a Rasch modelling approach	SCHOOL EFFECTIVENESS AND SCHOOL IMPROVEMENT			English	Article						secondary education; teachers' behaviour; students' perceptions; Rasch analysis	ITEM-FIT INDEX; INSTRUCTION; CLASSROOM; STUDENTS; ACHIEVEMENT; VALIDATION; FEEDBACK; OUTCOMES; DESIGN	The present study examines the development of a measure tapping students' perceptions of (pre-service) teachers' teaching behaviour to explore the practical value of such a measure in teacher education and teacher professional development programs. From a sample of 1,635 students of 91 pre-service teachers teaching in secondary education in The Netherlands, random subsamples of 809 students of 45…	[Maulana, Ridwan; Helms-Lorenz, Michelle; van de Grift, Wim] Univ Groningen, Dept Teacher Educ, Groningen, Netherlands	University of Groningen	Maulana, R (corresponding author), Univ Groningen, Dept Teacher Educ, Groningen, Netherlands.	r.maulana@rug.nl	Helms-Lorenz, Michelle/AAI-6377-2021	Helms-Lorenz, Michelle/0000-0001-9314-6962; van de Grift, Willem/0000-0001-9459-5292	Nederlandse organisatie voor Wetenschappelijk Onderzoek [NWO] [411-09-802]	Nederlandse organisatie voor Wetenschappelijk Onderzoek [NWO](Netherlands Organization for Scientific Research (NWO))	This study was part of the national research project about the relationship between the development of the quality of teaching behaviour of pre-service teachers and the preparation route of teacher education in Dutch secondary education. This project was financed by the Nederlandse organisatie voor Wetenschappelijk Onderzoek [NWO, 411-09-802]. NWO funds scientific research for Dutch universities …		89	71	75	1	40	ROUTLEDGE JOURNALS, TAYLOR & FRANCIS LTD	ABINGDON	2-4 PARK SQUARE, MILTON PARK, ABINGDON OX14 4RN, OXON, ENGLAND	0924-3453	1744-5124		SCH EFF SCH IMPROV	Sch. Eff. Sch. Improv.	APR 3	2015	26	2
J	Datu, JAD; King, RB				Datu, Jesus Alfonso D.; King, Ronnel B.			Subjective well-being is reciprocally associated with academic engagement: A two-wave longitudinal study	JOURNAL OF SCHOOL PSYCHOLOGY			English	Article						Academic engagement; Life satisfaction; Negative affect; Positive affect	ADOLESCENTS LIFE SATISFACTION; SCHOOL ENGAGEMENT; POSITIVE EMOTIONS; MEASUREMENT INVARIANCE; NEGATIVE AFFECT; ACHIEVEMENT; STUDENTS; TRAJECTORIES; PSYCHOLOGY; MOTIVATION	Previous studies have shown that subjective well-being promotes a wide range of adaptive psychological outcomes. However, the role of subjective well-being in the school context, as a potential facilitator of key academic outcomes, remains underexplored. The primary objective of this study was to examine the extent to which the different dimensions of subjective well-being-life satisfaction, posi…	[Datu, Jesus Alfonso D.] Educ Univ Hong Kong, Dept Special Educ & Counselling, Hong Kong, Hong Kong, Peoples R China; [King, Ronnel B.] Educ Univ Hong Kong, Dept Curriculum & Instruct, Hong Kong, Hong Kong, Peoples R China; [Datu, Jesus Alfonso D.] Educ Univ Hong Kong, Integrated Ctr Well Being I WELL, Hong Kong, Hong Kong, Peoples R China	Education University of Hong Kong (EdUHK); Education University of Hong Kong (EdUHK); Education University of Hong Kong (EdUHK)	Datu, JAD (corresponding author), Educ Univ Hong Kong, Room D2-2F-28,10 Ping Rd, Tai Po, Hong Kong, Peoples R China.	jadatu@eduhk.hk	King, Ronnel B/AGZ-0675-2022	King, Ronnel B/0000-0003-1723-1748; KING, Ronnel Bornasal/0000-0002-0648-8508; Datu, Jesus Alfonso/0000-0002-8790-1113					84	71	84	12	64	PERGAMON-ELSEVIER SCIENCE LTD	OXFORD	THE BOULEVARD, LANGFORD LANE, KIDLINGTON, OXFORD OX5 1GB, ENGLAND	0022-4405	1873-3506		J SCHOOL PSYCHOL	J. Sch. Psychol.	AUG	2018	69
J	Leath, S; Mathews, C; Harrison, A; Chavous, T				Leath, Seanna; Mathews, Channing; Harrison, Asya; Chavous, Tabbye			Racial Identity, Racial Discrimination, and Classroom Engagement Outcomes Among Black Girls and Boys in Predominantly Black and Predominantly White School Districts	AMERICAN EDUCATIONAL RESEARCH JOURNAL			English	Article						African American adolescents; gender; racial discrimination; racial identity; school racial context	AFRICAN-AMERICAN ADOLESCENTS; ACADEMIC-ACHIEVEMENT; MULTIDIMENSIONAL INVENTORY; STUDENTS; RACE; PERCEPTIONS; INVOLVEMENT; EXPERIENCES; GENDER; MALES	This study examined the associations among racial identity beliefs (centrality and public regard), racial discrimination, and academic engagement outcomes among 1,659 African American adolescents across two demographically distinct school districts, one predominantly Black, working class (n = 1,100) and one predominantly White, middle class (n = 559). Across these districts, the youths reported t…	[Leath, Seanna; Mathews, Channing; Harrison, Asya] Univ Michigan, Combined Program Educ & Psychol, 610 East Univ Ave, Ann Arbor, MI 48109 USA; [Chavous, Tabbye] Univ Michigan, Educ & Psychol, Ann Arbor, MI 48109 USA; [Chavous, Tabbye] Univ Michigan, Natl Ctr Inst Divers, Ann Arbor, MI 48109 USA; [Chavous, Tabbye] Univ Michigan, Ctr Study Black Youth Context, Ann Arbor, MI 48109 USA	University of Michigan System; University of Michigan; University of Michigan System; University of Michigan; University of Michigan System; University of Michigan; University of Michigan System; University of Michigan	Leath, S (corresponding author), Univ Michigan, Combined Program Educ & Psychol, 610 East Univ Ave, Ann Arbor, MI 48109 USA.	scadel@umich.edu							89	71	152	0	28	SAGE PUBLICATIONS INC	THOUSAND OAKS	2455 TELLER RD, THOUSAND OAKS, CA 91320 USA	0002-8312	1935-1011		AM EDUC RES J	Am. Educ. Res. J.	AUG	2019	56	4
J	Park, S; Holloway, SD; Arendtsz, A; Bempechat, J; Li, J				Park, Sira; Holloway, Susan D.; Arendtsz, Amanda; Bempechat, Janine; Li, Jin			What Makes Students Engaged in Learning? A Time-Use Study of Within- and Between-Individual Predictors of Emotional Engagement in Low-Performing High Schools	JOURNAL OF YOUTH AND ADOLESCENCE			English	Article						Self-determination; Emotional engagement; Within- and between-individual predictors	SELF-DETERMINATION-THEORY; ACADEMIC ENGAGEMENT; ACHIEVEMENT; AUTONOMY; COMPETENCE; MIDDLE; WELL; RACE; RELATEDNESS; MOTIVATION	Adolescents' emotional engagement plays a critical role in promoting their academic performance as well as overall psychological wellbeing. As a part of a 3-year longitudinal study, this study drew upon self-determination theory to examine three psychological predictors of emotional engagement within specific learning contexts. Ninety-four, low socioeconomic status (SES), ninth grade students (49…	[Park, Sira; Holloway, Susan D.; Arendtsz, Amanda] Univ Calif Berkeley, Grad Sch Educ, Dept Educ Cognit & Dev, Berkeley, CA 94720 USA; [Bempechat, Janine] Wheelock Coll, Dept Psychol & Human Dev, Boston, MA 02215 USA; [Li, Jin] Brown Univ, Dept Educ, Providence, RI 02912 USA	University of California System; University of California Berkeley; Brown University	Park, S (corresponding author), Univ Calif Berkeley, Grad Sch Educ, Dept Educ Cognit & Dev, 4316 Tolman Hall, Berkeley, CA 94720 USA.	sirapark@berkeley.edu; s_hollo@berkeley.edu; jbempechat@wheelock.edu; Jin_Li@Brown.edu	Bempechat, Janine/AAJ-7938-2020	Bempechat, Janine/0000-0003-0554-7534					44	70	171	1	55	SPRINGER/PLENUM PUBLISHERS	NEW YORK	233 SPRING ST, NEW YORK, NY 10013 USA	0047-2891	1573-6601		J YOUTH ADOLESCENCE	J. Youth Adolesc.	MAR	2012	41	3
J	Wang, XH; Tan, SC; Li, L				Wang, Xinghua; Tan, Seng Chee; Li, Lu			Technostress in university students' technology-enhanced learning: An investigation from multidimensional person-environment misfit	COMPUTERS IN HUMAN BEHAVIOR			English	Article						Technostress; Multidimensional person-environment misfit; University students; Technology-enhanced learning	ACADEMIC ENGAGEMENT; STRESS; FIT; SATISFACTION; IMPACT; CONSEQUENCES; INFORMATION; PERFORMANCE; ACCEPTANCE; INTENTION	This study investigated technostress among university students in technology-enhanced learning (TEL) from a multidimensional person-environment misfit perspective: technostress on the dimensions of person-organization (P-O) misfit, person-TEL (P-TEL) misfit, and person-people (P-O) misfit, respectively. A research model was created to examine how the three dimensions of technostress were related …	[Wang, Xinghua] Qingdao Univ, Normal Coll, Qingdao, Peoples R China; [Wang, Xinghua] Nanyang Technol Univ, Ctr Res & Dev Learning, Singapore, Singapore; [Tan, Seng Chee] Nanyang Technol Univ, Natl Inst Educ, Singapore, Singapore; [Li, Lu] Qingdao Univ, Sch Journalism & Commun, Qingdao, Peoples R China	Qingdao University; Nanyang Technological University; Nanyang Technological University; National Institute of Education (NIE) Singapore; Qingdao University	Wang, XH (corresponding author), Qingdao Univ, Normal Coll, Qingdao, Peoples R China.	wangxinghua379@gmail.com; sengchee.tan@nie.edu.sg; lilu227@msn.cn	sdf, sdf/ABH-9300-2020; Tan, Seng Chee/S-3918-2017	Wang, Xinghua/0000-0002-4246-8600; Tan, Seng Chee/0000-0002-8406-0144					56	70	77	20	120	PERGAMON-ELSEVIER SCIENCE LTD	OXFORD	THE BOULEVARD, LANGFORD LANE, KIDLINGTON, OXFORD OX5 1GB, ENGLAND	0747-5632	1873-7692		COMPUT HUM BEHAV	Comput. Hum. Behav.	APR	2020	105
J	Briesch, AM; Chafouleas, SM; Riley-Tillman, TC				Briesch, Amy M.; Chafouleas, Sandra M.; Riley-Tillman, T. Chris			Generalizability and Dependability of Behavior Assessment Methods to Estimate Academic Engagement: A Comparison of Systematic Direct Observation and Direct Behavior Rating	SCHOOL PSYCHOLOGY REVIEW			English	Article							TIME; PSYCHOMETRICS; VALIDATION; OBSERVERS; HALO	Although substantial attention has been directed toward building the psychometric evidence base for academic assessment methods (e.g., state mastery tests, curriculum-based measurement), similar examination of behavior assessment methods has been comparatively limited, particularly with regard to assessment purposes most desirable within problem-solving models. Therefore, an informed weighing of …	[Briesch, Amy M.] Northeastern Univ, Dept Counseling & Appl Educ Psychol, Bouve Coll Hlth Sci, Boston, MA 02115 USA; [Chafouleas, Sandra M.] Univ Connecticut, Neag Sch Educ, Storrs, CT 06269 USA; [Chafouleas, Sandra M.] Univ Connecticut, Ctr Behav Educ & Res, Storrs, CT 06269 USA; [Riley-Tillman, T. Chris] E Carolina Univ, Greenville, NC 27858 USA	Northeastern University; University of Connecticut; University of Connecticut; University of North Carolina; East Carolina University	Briesch, AM (corresponding author), Northeastern Univ, Dept Counseling & Appl Educ Psychol, Bouve Coll Hlth Sci, 360 Huntington Ave, Boston, MA 02115 USA.	a.briesch@neu.edu		Riley-Tillman, Timothy/0000-0001-7057-0429					27	69	106	0	25	NATL ASSOC SCHOOL PSYCHOLOGISTS	BETHESDA	4340 EAST WEST HWY, STE 402, BETHESDA, MD 20814 USA	0279-6015			SCHOOL PSYCHOL REV	Sch. Psychol. Rev.	SEP	2010	39	3
J	King, RB; McInerney, DM; Ganotice, FA; Villarosa, JB				King, Ronnel B.; McInerney, Dennis M.; Ganotice, Fraide A., Jr.; Villarosa, Jonalyn B.			Positive affect catalyzes academic engagement: Cross-sectional, longitudinal, and experimental evidence	LEARNING AND INDIVIDUAL DIFFERENCES			English	Article						Positive affect; Positive emotions; Broaden-and-build theory; Engagement; Disaffection	ACHIEVEMENT GOALS; NEGATIVE AFFECT; JOB-SATISFACTION; EMOTIONS; HAPPINESS; STUDENTS; OUTCOMES; HEALTH; MOOD; PERSPECTIVES	This study examined the role of positive affect on academic engagement and its opposite disaffection using cross-sectional (Study 1), longitudinal (Study 2), and experimental (Study 3) designs. Results of Studies 1 and 2 indicated that students who experienced higher levels of positive affect were more engaged in school and exhibited lower levels of disaffection. Study 3 showed that students whos…	[King, Ronnel B.; McInerney, Dennis M.] Hong Kong Inst Educ, Hong Kong, Hong Kong, Peoples R China; [Ganotice, Fraide A., Jr.] Univ Hong Kong, Hong Kong, Hong Kong, Peoples R China; [Ganotice, Fraide A., Jr.; Villarosa, Jonalyn B.] Palawan State Univ, Palawan, Philippines	Education University of Hong Kong (EdUHK); University of Hong Kong	King, RB (corresponding author), Hong Kong Inst Educ, Dept Curriculum & Instruct, 10 Lo Ping Rd, Hong Kong, Hong Kong, Peoples R China.	ronnel@ied.edu.hk	King, Ronnel B/AGZ-0675-2022	King, Ronnel B/0000-0003-1723-1748; McInerney, Dennis/0000-0003-1339-1744; Ganotice, Fraide A./0000-0003-3139-9926; KING, Ronnel Bornasal/0000-0002-0648-8508					71	69	88	4	46	ELSEVIER	AMSTERDAM	RADARWEG 29, 1043 NX AMSTERDAM, NETHERLANDS	1041-6080	1873-3425		LEARN INDIVID DIFFER	Learn. Individ. Differ.	APR	2015	39
J	Datu, JAD; Valdez, JPM				Datu, Jesus Alfonso D.; Valdez, Jana Patricia M.			Psychological Capital Predicts Academic Engagement and Well-Being in Filipino High School Students	ASIA-PACIFIC EDUCATION RESEARCHER			English	Article						Academic engagement; Psychological capital; Well-being	MEDIATING ROLE; IMPACT; PERFORMANCE; VALIDATION; INVARIANCE; EMPLOYEES; ATTITUDES	Previous literature emphasized the role of psychological capital (PsyCap) in fostering positive organizational and work outcomes. However, there were very scarce investigations on the benefits of PsyCap especially in non-Western academic settings. The current research addresses this gap through assessing the extent to which PsyCap can be associated with optimal academic and wellbeing outcomes. Th…	[Datu, Jesus Alfonso D.] Univ Hong Kong, Fac Educ, Div Learning Dev & Divers, Pokfulam Rd, Hong Kong, Hong Kong, Peoples R China; [Valdez, Jana Patricia M.] De La Salle Univ, Manila 1004, Philippines	University of Hong Kong; De La Salle University	Datu, JAD (corresponding author), Univ Hong Kong, Fac Educ, Div Learning Dev & Divers, Pokfulam Rd, Hong Kong, Hong Kong, Peoples R China.	jess.datu@yahoo.com	Valdez, Jana Patricia Millonado/HRC-9854-2023	Valdez, Jana Patricia Millonado/0000-0002-1237-2237; Datu, Jesus Alfonso/0000-0002-8790-1113					36	69	86	2	49	SPRINGER HEIDELBERG	HEIDELBERG	TIERGARTENSTRASSE 17, D-69121 HEIDELBERG, GERMANY	0119-5646	2243-7908		ASIA-PAC EDUC RES	Asia-Pac. Educ. Res.	JUN	2016	25	3
J	Mesurado, B; Richaud, MC; Mateo, NJ				Mesurado, Belen; Cristina Richaud, Maria; Jose Mateo, Nino			Engagement, Flow, Self-Efficacy, and Eustress of University Students: A Cross-National Comparison Between the Philippines and Argentina	JOURNAL OF PSYCHOLOGY			English	Article						engagement; eustress; cross-cultural comparison; self-efficacy; flow	CULTURAL-DIFFERENCES; FIT INDEXES; BURNOUT; SATISFACTION; PERFORMANCE; MOTIVATION; BELIEFS; STRESS; MODEL; WORK	This study examined how self-efficacy, eustress, and flow interact with academic engagement. First, it aimed to test a theoretical model that proposes that self-efficacy and eustress promote both flow and engagement and that, in turn, the state of flow promotes academic engagement in undergraduate student. We hypothesized that the theoretical model would be invariant for two countries: the Philip…	[Mesurado, Belen; Cristina Richaud, Maria] Consejo Nacl Invest Cient & Tecn, Interdisciplinary Ctr Math & Expt Psychol Res CII, RA-1033 Buenos Aires, DF, Argentina; [Jose Mateo, Nino] De La Salle Univ, Manila 1004, Philippines	Consejo Nacional de Investigaciones Cientificas y Tecnicas (CONICET); De La Salle University	Mesurado, B (corresponding author), Tte Gral Peron 2158, RA-1040 Buenos Aires, DF, Argentina.	bmesurado@conicet.gov.ar	Mesurado, Belén/GSN-8496-2022; Mesurado, Belen/AAR-9128-2020; Richaud, María C/E-1193-2011	Mesurado, Belén/0000-0002-5907-5854; Mesurado, Belen/0000-0002-5907-5854;					67	69	87	2	95	ROUTLEDGE JOURNALS, TAYLOR & FRANCIS LTD	ABINGDON	2-4 PARK SQUARE, MILTON PARK, ABINGDON OX14 4RN, OXON, ENGLAND	0022-3980	1940-1019		J PSYCHOL	J. Psychol.	APR 2	2016	150	3
J	Griffith, AN; Hurd, NM; Hussain, SB				Griffith, Aisha N.; Hurd, Noelle M.; Hussain, Saida B.			I Didn't Come to School for This: A Qualitative Examination of Experiences With Race-Related Stressors and Coping Responses Among Black Students Attending a Predominantly White Institution	JOURNAL OF ADOLESCENT RESEARCH			English	Article						Black college students; predominantly White institution; race-related stressors; coping; natural mentors	NATURAL MENTORS; RACIAL-DISCRIMINATION; ACADEMIC ENGAGEMENT; EXPLORING PATHWAYS; SOCIAL SUPPORT; MENTAL-HEALTH; SUBSTANCE USE; MICROAGGRESSIONS; IDENTITIES; CONTEXT	Exposure to race-related stressors such as discrimination may take a toll on Black undergraduates attending predominantly White institutions (PWIs) who must contend with these stressors in addition to stressors common to the developmental space of emerging adulthood and the transition to college. The aim of this study was to explore Black students' experiences of race-related stressors, coping re…	[Griffith, Aisha N.; Hussain, Saida B.] Univ Virginia, Charlottesville, VA USA; [Hurd, Noelle M.] Univ Virginia, Dept Psychol, 102 Gilmer Hall,POB 400400, Charlottesville, VA 22904 USA	University of Virginia; University of Virginia	Hurd, NM (corresponding author), Univ Virginia, Dept Psychol, 102 Gilmer Hall,POB 400400, Charlottesville, VA 22904 USA.	nh3v@virginia.edu		Griffith, Aisha/0000-0002-6421-4310	National Science Foundation CHARGE Enhancement Grant - University of Virginia; National Academy of Education and Spencer Foundation; William T. Grant Foundation Scholar Award	National Science Foundation CHARGE Enhancement Grant - University of Virginia; National Academy of Education and Spencer Foundation; William T. Grant Foundation Scholar Award	The author(s) disclosed receipt of the following financial support for the research, authorship, and/or publication of this article: This study was funded through a National Science Foundation CHARGE Enhancement Grant awarded by the University of Virginia to the second and third authors. The writing of this article was supported in part by a postdoctoral fellowship through the National Academy of…		37	69	124	5	26	SAGE PUBLICATIONS INC	THOUSAND OAKS	2455 TELLER RD, THOUSAND OAKS, CA 91320 USA	0743-5584	1552-6895		J ADOLESCENT RES	J. Adolesc. Res.	MAR	2019	34	2
J	Green, G; Rhodes, J; Hirsch, AH; Suárez-Orozco, C; Camic, PM				Green, Gillian; Rhodes, Jean; Hirsch, Abigail Heitler; Suarez-Orozco, Carola; Camic, Paul M.			Supportive adult relationships and the academic engagement of Latin American immigrant youth	JOURNAL OF SCHOOL PSYCHOLOGY			English	Article						immigrant youth; teacher-student relationship; academic engagement	TEACHER-CHILD RELATIONSHIPS; HIGH-SCHOOL; MIDDLE SCHOOL; STUDENTS; ADOLESCENTS; MODELS; PERCEPTIONS; RESILIENCE; TRANSITION; ADJUSTMENT	The central aim of this study was to explore the academic engagement trajectories of a sample of recently arrived immigrant students from Latin America. Using an analytic framework that can dynamically model time-sensitive fluctuations (HLM; [Raudenbush, S. W., & Bryk, A. S. (2002). Hierarchicical Linear Models: Applications and Data Analysis Methods (2nd Edition ed.). Thousand Oaks, CA: Sage Pub…	[Green, Gillian; Rhodes, Jean; Hirsch, Abigail Heitler] Univ Massachusetts, Boston, MA 02125 USA; [Suarez-Orozco, Carola] NYU, New York, NY 10003 USA; [Camic, Paul M.] Canterbury Christ Church Univ, Canterbury, Kent, England	University of Massachusetts System; University of Massachusetts Boston; New York University; Canterbury Christ Church University	Rhodes, J (corresponding author), Univ Massachusetts, Boston, MA 02125 USA.	Jean.Rhodes@umb.edu		Camic, Paul/0000-0002-4444-6544					61	68	132	0	23	PERGAMON-ELSEVIER SCIENCE LTD	OXFORD	THE BOULEVARD, LANGFORD LANE, KIDLINGTON, OXFORD OX5 1GB, ENGLAND	0022-4405			J SCHOOL PSYCHOL	J. Sch. Psychol.	AUG	2008	46	4
J	Preckel, F; Niepel, C; Schneider, M; Brunner, M				Preckel, Franzis; Niepel, Christoph; Schneider, Marian; Brunner, Martin			Self-concept in adolescence: A longitudinal study on reciprocal effects of self-perceptions in academic and social domains	JOURNAL OF ADOLESCENCE			English	Article						Academic self-concept; Social self-concept; Social acceptance; Social assertion; Adolescence; Longitudinal data	PEER EXPERIENCES; FIT INDEXES; TEST-SCORES; ACHIEVEMENT; ABILITY; VICTIMIZATION; CONSEQUENCES; COMPETENCE; VALIDATION; CHILDHOOD	Fostering social and academic self-concepts are central educational goals. During mid-adolescence academic engagement and success seem to be devalued by peers and to be negatively associated with students' social standing. For this age group, is the development of a positive academic self-concept compatible with the development of a positive social self-concept? We investigated relations among ac…	[Preckel, Franzis; Niepel, Christoph; Schneider, Marian] Univ Trier, Dept Psychol, D-54286 Trier, Germany; [Brunner, Martin] Univ Berlin, Berlin, Germany; [Brunner, Martin] Berlin Brandenburg Inst Sch Qual, Berlin, Germany	Universitat Trier	Preckel, F (corresponding author), Univ Trier, Dept Psychol, Univ Ring 15, D-54286 Trier, Germany.	preckel@uni-trier.de	Brunner, Martin/HZK-0308-2023; Niepel, Christoph/ACK-9220-2022	Brunner, Martin/0000-0001-7182-5622; Niepel, Christoph/0000-0001-6376-7901					73	68	86	10	144	WILEY	HOBOKEN	111 RIVER ST, HOBOKEN 07030-5774, NJ USA	0140-1971	1095-9254		J ADOLESCENCE	J. Adolesc.	DEC	2013	36	6
J	Cappella, E; Kim, HY; Neal, JW; Jackson, DR				Cappella, Elise; Kim, Ha Yeon; Neal, Jennifer W.; Jackson, Daisy R.			Classroom Peer Relationships and Behavioral Engagement in Elementary School: The Role of Social Network Equity	AMERICAN JOURNAL OF COMMUNITY PSYCHOLOGY			English	Article						Social networks; Behavioral engagement; Classroom organization; Behavioral difficulties	DEFICIT HYPERACTIVITY DISORDER; ACADEMIC ENGAGEMENT; ACHIEVEMENT; CHILDREN; VICTIMIZATION; AGGRESSION; ATTENTION; STUDENTS; RISK; INTERDEPENDENCE	Applying social capital and systems theories of social processes, we examine the role of the classroom peer context in the behavioral engagement of low-income students (N = 80) in urban elementary school classrooms (N = 22). Systematic child observations were conducted to assess behavioral engagement among second to fifth graders in the fall and spring of the same school year. Classroom observati…	[Cappella, Elise; Kim, Ha Yeon; Jackson, Daisy R.] NYU, Dept Appl Psychol, New York, NY 10003 USA; [Neal, Jennifer W.] Michigan State Univ, Dept Psychol, E Lansing, MI 48824 USA	New York University; Michigan State University	Cappella, E (corresponding author), NYU, Dept Appl Psychol, 246 Greene St, New York, NY 10003 USA.	elise.cappella@nyu.edu	Neal, Jennifer/C-3173-2009	Neal, Jennifer/0000-0002-7749-8121; Kim, Ha Yeon/0000-0001-7468-1310	NIMH NIH HHS [P20 MH078458, 1P20MH078458-01A2] Funding Source: Medline	NIMH NIH HHS(United States Department of Health & Human ServicesNational Institutes of Health (NIH) - USANIH National Institute of Mental Health (NIMH))			73	68	110	4	68	WILEY	HOBOKEN	111 RIVER ST, HOBOKEN 07030-5774, NJ USA	0091-0562	1573-2770		AM J COMMUN PSYCHOL	Am. J. Community Psychol.	DEC	2013	52	3-4
J	van de Grift, W; Helms-Lorenz, M; Maulana, R				van de Grift, Wim; Helms-Lorenz, Michelle; Maulana, Ridwan			Teaching skills of student teachers: Calibration of an evaluation instrument and its value in predicting student academic engagement	STUDIES IN EDUCATIONAL EVALUATION			English	Article						Teaching skills; Evaluation instrument; Rasch model; Student teachers; Secondary education	INSTRUCTION; MATHEMATICS; FEEDBACK; BEHAVIOR; OUTCOMES; ABILITY	Student teachers are expected to develop their teaching skills sooner and more rapidly. However, a sound evaluation instrument that can be used to diagnose and monitor the skilfulness level to aid formative assessment of student teachers is still limited. This article is aimed to calibrate and validate a teaching skill evaluation instrument for use in secondary education. A total of 264 student t…	[van de Grift, Wim; Helms-Lorenz, Michelle; Maulana, Ridwan] Univ Groningen, Dept Teacher Educ, NL-9712 TS Groningen, Netherlands	University of Groningen	Maulana, R (corresponding author), Univ Groningen, Dept Teacher Educ, Grote Kruisstr 2-1, NL-9712 TS Groningen, Netherlands.	r.maulana@rug.nl	Helms-Lorenz, Michelle/AAI-6377-2021	Helms-Lorenz, Michelle/0000-0001-9314-6962; van de Grift, Willem/0000-0001-9459-5292	Nederlandse organisatie voor Wetenschappelijk Onderzoek (NWO) [411-09-802]	Nederlandse organisatie voor Wetenschappelijk Onderzoek (NWO)(Netherlands Organization for Scientific Research (NWO))	Our special thanks go to Anna Verkade and Esther Canrinus for their significant commitment and dedication to contributing in the national project. This work was supported by the Nederlandse organisatie voor Wetenschappelijk Onderzoek (NWO, project number 411-09-802). NWO funds scientific research at Dutch universities and institutes.		85	68	72	3	43	ELSEVIER	AMSTERDAM	RADARWEG 29, 1043 NX AMSTERDAM, NETHERLANDS	0191-491X			STUD EDUC EVAL	Stud. Educ. Eval.	DEC	2014	43
J	Collie, RJ; Martin, AJ; Papworth, B; Ginns, P				Collie, Rebecca J.; Martin, Andrew J.; Papworth, Brad; Ginns, Paul			Students' interpersonal relationships, personal best (PS) goals, and academic engagement	LEARNING AND INDIVIDUAL DIFFERENCES			English	Article						Personal best (PB) goals; Growth; Interpersonal relationships; Engagement; Self-determination theory	TEACHER-CHILD RELATIONSHIPS; OF-FIT INDEXES; SCHOOL ENGAGEMENT; PARENTAL INVOLVEMENT; ACHIEVEMENT-MOTIVATION; CLASSROOM; MODEL; SUPPORT; EXPERIENCES; COMPETENCE	Informed by self-determination theory, the aims of this study were to examine the extent to which students' interpersonal relationships (a basic psychological need) with teachers, parents, and peers are associated with personal best (PB) goals and academic engagement, as well as the extent to which PB goals are associated with academic engagement beyond the effects of interpersonal relationships.…	[Collie, Rebecca J.; Martin, Andrew J.] Univ New S Wales, Sch Educ, Sydney, NSW 2052, Australia; [Papworth, Brad; Ginns, Paul] Univ Sydney, Fac Educ & Social Work, Sydney, NSW 2006, Australia	University of New South Wales Sydney; University of Sydney	Martin, AJ (corresponding author), Univ New S Wales, Sch Educ, Sydney, NSW 2052, Australia.	andrew.martin@unsw.edu.au		Papworth, Brad/0000-0001-8421-2470; Ginns, Paul/0000-0003-0714-5205	Australian Research Council; Australian Boarding School Association [LP0990853]; Australian Research Council [LP0990853] Funding Source: Australian Research Council	Australian Research Council(Australian Research Council); Australian Boarding School Association; Australian Research Council(Australian Research Council)	The authors would like to thank the Australian Research Council and the Australian Boarding School Association (LP0990853) for funding this research.		97	68	99	6	63	ELSEVIER	AMSTERDAM	RADARWEG 29, 1043 NX AMSTERDAM, NETHERLANDS	1041-6080	1873-3425		LEARN INDIVID DIFFER	Learn. Individ. Differ.	JAN	2016	45
J	Godfrey, EB; Burson, EL; Yanisch, TM; Hughes, D; Way, N				Godfrey, Erin B.; Burson, Esther L.; Yanisch, Tess M.; Hughes, Diane; Way, Niobe			A Bitter Pill to Swallow? Patterns of Critical Consciousness and Socioemotional and Academic Well-Being in Early Adolescence	DEVELOPMENTAL PSYCHOLOGY			English	Article						critical consciousness; system justification; latent class analysis; mental health; academic outcomes	AFRICAN-AMERICAN; SOCIOPOLITICAL DEVELOPMENT; RACIAL/ETHNIC MINORITY; SYSTEM-JUSTIFICATION; CIVIC ENGAGEMENT; YOUTH; SCHOOL; POOR; ATTRIBUTIONS; RESILIENCE	An increasing body of research on critical consciousness explores how youth understand and react to inequality in their social contexts. The operationalization of critical consciousness remains inchoate, however. Developmental psychology traditionally conceptualizes critical consciousness as three components (critical reflection, political efficacy, and critical action), but how levels of these c…	[Godfrey, Erin B.; Burson, Esther L.; Yanisch, Tess M.; Hughes, Diane; Way, Niobe] NYU, Dept Appl Psychol, Steinhardt Sch Culture Educ & Human Dev, 246 Greene St,804 West, New York, NY 10003 USA	New York University	Godfrey, EB (corresponding author), NYU, Dept Appl Psychol, Steinhardt Sch Culture Educ & Human Dev, 246 Greene St,804 West, New York, NY 10003 USA.	erin.godfrey@nyu.edu	Burson, Esther/HKF-2668-2023; Burson, Esther/AAV-3935-2021	Burson, Esther/0000-0001-9682-6349;					60	68	96	0	25	AMER PSYCHOLOGICAL ASSOC	WASHINGTON	750 FIRST ST NE, WASHINGTON, DC 20002-4242 USA	0012-1649	1939-0599		DEV PSYCHOL	Dev. Psychol.	MAR	2019	55	3
J	Jenkins, KEH; Stephens, JC; Reames, TG; Hernández, D				Jenkins, Kirsten E. H.; Stephens, Jennie C.; Reames, Tony G.; Hernandez, Diana			Towards impactful energy justice research: Transforming the power of academic engagement	ENERGY RESEARCH & SOCIAL SCIENCE			English	Article						Energy justice; Energy policy; Translational research; Research impact	DISPARITIES; INSECURITY; EXTRACTION; EQUITY; NEXUS	The field of energy justice is at a critical juncture. As the social dimensions of energy systems are becoming more salient, it is time to reflect on what has been achieved, and look towards a future of greater impact and transdisciplinary methods in energy justice research and practice. In the past 10 years, the energy justice literature has grown exponentially demonstrating the appeal and the v…	[Jenkins, Kirsten E. H.] Univ Edinburgh, Sci Technol & Innovat Studies, Edinburgh, Midlothian, Scotland; [Stephens, Jennie C.] Northeastern Univ, Sch Publ Policy & Urban Affairs, Boston, MA 02115 USA; [Reames, Tony G.] Univ Michigan, Sch Environm & Sustainabil, Ann Arbor, MI 48109 USA; [Hernandez, Diana] Columbia Univ, Mailman Sch Publ Hlth, New York, NY 10027 USA	University of Edinburgh; Northeastern University; University of Michigan System; University of Michigan; Columbia University	Jenkins, KEH (corresponding author), Univ Edinburgh, Sci Technol & Innovat Studies, Edinburgh, Midlothian, Scotland.	kirsten.jenkins@ed.ac.uk	Reames, Tony G./AAV-3989-2021	Reames, Tony G./0000-0002-0738-8525; Stephens, Jennie C./0000-0003-0386-8115; Jenkins, Kirsten/0000-0002-3681-647X					49	68	74	4	22	ELSEVIER	AMSTERDAM	RADARWEG 29, 1043 NX AMSTERDAM, NETHERLANDS	2214-6296	2214-6326		ENERGY RES SOC SCI	Energy Res. Soc. Sci.	SEP	2020	67
J	Stipek, D; Byler, P				Stipek, D; Byler, P			Academic achievement and social behaviors associated with age of entry into kindergarten	JOURNAL OF APPLIED DEVELOPMENTAL PSYCHOLOGY			English	Article						early childhood education; kindergarten	SCHOOL; ADJUSTMENT; BIRTHDATE; READINESS; CHILDREN; SEX	A longitudinal design (kindergarten through third grade) was used to assess the effects of the age at which children entered kindergarten on children's academic achievement, social skills, academic engagement, relationship with teachers, and self ratings of academic skills. The sample was ethnically diverse; all of the over 200 children in the study came from low-income families. Results indicate…	Univ Calif Los Angeles, Los Angeles, CA 90024 USA	University of California System; University of California Los Angeles	Stipek, D (corresponding author), Stanford Univ, Sch Educ, 485 Lasuen Mall, Stanford, CA 94305 USA.								37	67	108	1	18	ELSEVIER SCIENCE INC	NEW YORK	655 AVENUE OF THE AMERICAS, NEW YORK, NY 10010 USA	0193-3973			J APPL DEV PSYCHOL	J. Appl. Dev. Psychol.		2001	22	2
J	Sharkey, JD; You, S; Schnoebelen, K				Sharkey, Jill D.; You, Sukkyung; Schnoebelen, Katrina			Relations among school assets, individual resilience, and student engagement for youth grouped by level of family functioning	PSYCHOLOGY IN THE SCHOOLS			English	Article							ACADEMIC ENGAGEMENT; MIDDLE SCHOOL; ADOLESCENTS; CONNECTEDNESS; RISK; ACHIEVEMENT; OUTCOMES; CONTEXT; TEACHER; INVOLVEMENT	Given the importance of student engagement for healthy outcomes, research needs to investigate whether school-based assets promote student engagement beyond individual and family influences, Unfortunately, such research has been limited by a lack of valid instrumentation. After examining the psychometrics of the California Healthy Kids Survey Resilience Youth Development Module, we used this risk…	[Sharkey, Jill D.; You, Sukkyung; Schnoebelen, Katrina] Univ Calif Santa Barbara, Gevirtz Grad Sch Educ, Dept Counseling Clin & Sch Psychol, Santa Barbara, CA 93106 USA	University of California System; University of California Santa Barbara	Sharkey, JD (corresponding author), Univ Calif Santa Barbara, Gevirtz Grad Sch Educ, Dept Counseling Clin & Sch Psychol, Santa Barbara, CA 93106 USA.	jsharkey@education.ucsb.edu							63	67	121	2	27	WILEY	HOBOKEN	111 RIVER ST, HOBOKEN 07030-5774, NJ USA	0033-3085	1520-6807		PSYCHOL SCHOOLS	Psychol. Schools	MAY	2008	45	5
J	Fan, WH				Fan, Weihua			Social influences, school motivation and gender differences: an application of the expectancy-value theory	EDUCATIONAL PSYCHOLOGY			English	Article						school motivation; social influences; gender differences; expectancy-value theory	SELF-EFFICACY BELIEFS; ACHIEVEMENT-MOTIVATION; ACADEMIC MOTIVATION; SEX-DIFFERENCES; MIDDLE-SCHOOL; PEER PRESSURE; TASK-VALUE; STUDENTS; ENGAGEMENT; ASPIRATIONS	The present study examined the structural relations of social influences, task values, ability beliefs, educational expectation and academic engagement for both boys and girls. The structural equation modelling analyses provided nationally representative evidence of gender differences in: (1) the links from teacher-student relationship and peer friends' academic value to student task values; and …	Univ Houston, Dept Educ Psychol, Houston, TX 77004 USA	University of Houston System; University of Houston	Fan, WH (corresponding author), Univ Houston, Dept Educ Psychol, Houston, TX 77004 USA.	wfan@mail.coe.uh.edu							68	67	101	4	81	ROUTLEDGE JOURNALS, TAYLOR & FRANCIS LTD	ABINGDON	2-4 PARK SQUARE, MILTON PARK, ABINGDON OX14 4RN, OXON, ENGLAND	0144-3410	1469-5820		EDUC PSYCHOL-UK	Educ. Psychol.		2011	31	2
J	Yee, A				Yee, April			The Unwritten Rules Of Engagement: Social Class Differences in Undergraduates' Academic Strategies	JOURNAL OF HIGHER EDUCATION			English	Article						social class; student engagement; first-generation students	1ST-GENERATION COLLEGE-STUDENTS; EXPERIENCES; INVOLVEMENT	Research has shown social class differences in undergraduate engagement, yet we know little about the reasons for these afferences. Drawing on interviews and participant observation with undergraduates at an urban, public comprehensive university, this ethnographic study investigates the academic engagement strategies of students from different social class backgrounds during their first two year…	[Yee, April] James Irvine Fdn, Francisco, CA 94104 USA		Yee, A (corresponding author), James Irvine Fdn, Francisco, CA 94104 USA.	ayee@irvine.org							59	67	123	4	34	ROUTLEDGE JOURNALS, TAYLOR & FRANCIS LTD	ABINGDON	2-4 PARK SQUARE, MILTON PARK, ABINGDON OX14 4RN, OXON, ENGLAND	0022-1546	1538-4640		J HIGH EDUC-UK	J. High. Educ.	NOV-DEC	2016	87	6
J	Burns, EC; Martin, AJ; Collie, RJ				Burns, Emma C.; Martin, Andrew J.; Collie, Rebecca J.			Adaptability, personal best (PB) goals setting, and gains in students' academic outcomes: A longitudinal examination from a social cognitive perspective	CONTEMPORARY EDUCATIONAL PSYCHOLOGY			English	Article						Social cognitive theory; Adaptability; Goals; Engagement; Achievement	OF-FIT INDEXES; SELF-EFFICACY; HIGH-SCHOOL; INTERPERSONAL RELATIONSHIPS; LIFE-SPAN; ADOLESCENTS PERCEPTIONS; ACHIEVEMENT-MOTIVATION; AUTONOMY SUPPORT; TASK-VALUE; ENGAGEMENT	The present investigation examines how two novel constructs, adaptability (for self-regulation) and PB goal setting (for goal setting), operate alongside the more traditional constructs of the triadic model of social cognitive theory (SCT; Bandura, 1986) to predict students' academic gains over time. Given that the triadic model highlights the importance of self-regulation and goal setting in hum…	[Burns, Emma C.; Martin, Andrew J.; Collie, Rebecca J.] Univ New South Wales, Sch Educ, Sydney, NSW 2052, Australia	University of New South Wales Sydney	Martin, AJ (corresponding author), Univ New South Wales, Sch Educ, Sydney, NSW 2052, Australia.	andrew.martin@unsw.edu.au	Burns, Emma/KHT-9036-2024	Martin, Andrew/0000-0001-5504-392X; Burns, Emma C/0000-0001-6323-1816	Australian Research Council [DP140104294]	Australian Research Council(Australian Research Council)	This study was funded by the Australian Research Council (Grant #DP140104294).		106	67	87	5	42	ACADEMIC PRESS INC ELSEVIER SCIENCE	SAN DIEGO	525 B ST, STE 1900, SAN DIEGO, CA 92101-4495 USA	0361-476X	1090-2384		CONTEMP EDUC PSYCHOL	Contemp. Educ. Psychol.	APR	2018	53
J	Verkuyten, M; Thijs, J; Gharaei, N				Verkuyten, Maykel; Thijs, Jochem; Gharaei, Nadya			Discrimination and academic (dis)engagement of ethnic-racial minority students: a social identity threat perspective	SOCIAL PSYCHOLOGY OF EDUCATION			English	Article						Discrimination; Academic engagement; Minority students	SELF-DETERMINATION THEORY; HIGH-SCHOOL-STUDENTS; OPPOSITIONAL CULTURE; PERCEIVED DISCRIMINATION; AMERICAN ADOLESCENTS; GROUP IDENTIFICATION; RACIAL/ETHNIC DISCRIMINATION; STEREOTYPE THREAT; ENGAGEMENT; ACHIEVEMENT	In this paper we discuss the social identity processes by which discrimination can have an impact on ethnic-racial minority group students' academic engagement. After considering the forms, targets and sources of discrimination, we argue that discrimination implies social identity threat. Threats to ethnic/racial identity compromise specific social identity needs (belongingness, esteem, control) …	[Verkuyten, Maykel; Thijs, Jochem] Univ Utrecht, Fac Social & Behav Sci, Padualaan 14, NL-3584 CH Utrecht, Netherlands; [Verkuyten, Maykel] Univ Utrecht, Dept Social Sci, POB 80-140, NL-3508 TC Utrecht, Netherlands; [Gharaei, Nadya] Leuven Univ, Louvain, Belgium	Utrecht University; Utrecht University; KU Leuven	Verkuyten, M (corresponding author), Univ Utrecht, Fac Social & Behav Sci, Padualaan 14, NL-3584 CH Utrecht, Netherlands.;Verkuyten, M (corresponding author), Univ Utrecht, Dept Social Sci, POB 80-140, NL-3508 TC Utrecht, Netherlands.	m.verkuyten@uu.nl	Verkuyten, Maykel/E-7990-2013	Verkuyten, Maykel/0000-0003-0137-1527					138	67	87	2	43	SPRINGER	DORDRECHT	VAN GODEWIJCKSTRAAT 30, 3311 GZ DORDRECHT, NETHERLANDS	1381-2890	1573-1928		SOC PSYCHOL EDUC	Soc. Psychol. Educ.	APR	2019	22	2
J	Sun, YQ; Ni, LH; Zhao, YM; Shen, XL; Wang, N				Sun, Yongqiang; Ni, Linghong; Zhao, Yiming; Shen, Xiao-Liang; Wang, Nan			Understanding students' engagement in MOOCs: An integration of self-determination theory and theory of relationship quality	BRITISH JOURNAL OF EDUCATIONAL TECHNOLOGY			English	Article							COMMITMENT-TRUST THEORY; ONLINE COURSES MOOCS; PSYCHOLOGICAL ENGAGEMENT; EXTRINSIC MOTIVATIONS; ACADEMIC ENGAGEMENT; SCHOOL ENGAGEMENT; HIGHER-EDUCATION; MEDIATING ROLE; PERFORMANCE; KNOWLEDGE	Although Massive Open Online Courses (MOOCs) attract millions of people to enroll in their courses, the completion rate for most courses is very low. A majority of MOOCs students are not fully engaged in MOOCs, thus leading them to quit in the early stage of the courses. Therefore, it is important to investigate students' engagement in MOOCs. Drawing on self-determination theory and the theory of…	[Sun, Yongqiang; Ni, Linghong; Wang, Nan] Wuhan Univ, Sch Informat Management, Wuhan, Hubei, Peoples R China; [Zhao, Yiming] Wuhan Univ, Ctr Studies Informat Resources, Wuhan 430072, Hubei, Peoples R China; [Shen, Xiao-Liang] Wuhan Univ, Econ & Management Sch, Wuhan, Hubei, Peoples R China	Wuhan University; Wuhan University; Wuhan University	Zhao, YM (corresponding author), Wuhan Univ, Ctr Studies Informat Resources, Wuhan 430072, Hubei, Peoples R China.	zhaoyiming@whu.edu.cn	Zhao, Yiming/C-9783-2015; Sun, Yongqiang/K-4074-2019; Shen, Xiao-Liang/F-3785-2018	Shen, Xiao-Liang/0000-0001-9426-9235; Sun, Yongqiang/0000-0001-8753-9268; Wang, Nan/0000-0002-5206-9937					73	67	73	12	132	WILEY	HOBOKEN	111 RIVER ST, HOBOKEN 07030-5774, NJ USA	0007-1013	1467-8535		BRIT J EDUC TECHNOL	Br. J. Educ. Technol.	NOV	2019	50	6
J	O'Connor, C				O'Connor, C			Race, class, and gender in America: Narratives of opportunity among low-income African-American youths	SOCIOLOGY OF EDUCATION			English	Article; Proceedings Paper	Annual Meeting of the American-Sociological-Association	AUG 20-27, 1998	SAN FRANCISCO, CA	Amer Sociol Assoc			EXTERNAL CONTROL; BLACK-STUDENTS; SCHOOL; ACHIEVEMENT; BEHAVIOR	The research literature has explored the relationship between marginalized students' perceptions of social opportunity and mobility and their academic orientation. However, little attention has: been paid td-the extent to which-these students simultaneously represent multiple social identities and how they may differentially assess life chances in tight of-their different social locations. This;a…	Univ Michigan, Sch Educ, Ann Arbor, MI 48109 USA	University of Michigan System; University of Michigan	Univ Michigan, Sch Educ, 610 E Univ Ave,4001 SEB, Ann Arbor, MI 48109 USA.	coconnor@umich.edu							49	66	136	0	18	SAGE PUBLICATIONS INC	THOUSAND OAKS	2455 TELLER RD, THOUSAND OAKS, CA 91320 USA	0038-0407	1939-8573		SOCIOL EDUC	Sociol. Educ.	JUL	1999	72	3
J	Cho, MH; Cho, Y				Cho, Moon-Heum; Cho, YoonJung			Instructor scaffolding for interaction and students' academic engagement in online learning: Mediating role of perceived online class goal structures	INTERNET AND HIGHER EDUCATION			English	Article						Role of online instructor; Scaffolding for interaction; Online class goal structures; Academic engagement; Online learning	ACHIEVEMENT; ORIENTATIONS; ENVIRONMENTS; MOTIVATION	The purpose of this study was to examine the relationship between instructor scaffolding for interaction and students' academic engagement in an online learning environment mediated by perceived class goal structures. Path analysis was used to explore the relationships among the variables. The data from 158 college students revealed that online instructors' scaffolding for interaction had a signi…	[Cho, Moon-Heum] Kent State Univ Stark, North Canton, OH 44720 USA; [Cho, YoonJung] Oklahoma State Univ, Sch Appl Hlth & Educ Psychol, Stillwater, OK 74078 USA	University System of Ohio; Kent State University; Kent State University Stark; Oklahoma State University System; Oklahoma State University - Stillwater	Cho, MH (corresponding author), Kent State Univ Stark, 407 Main Hall, North Canton, OH 44720 USA.	mhcho@kent.edu							28	66	97	3	72	ELSEVIER SCIENCE INC	NEW YORK	STE 800, 230 PARK AVE, NEW YORK, NY 10169 USA	1096-7516	1873-5525		INTERNET HIGH EDUC	Internet High. Educ.	APR	2014	21
J	Serrano, C; Andreu, Y				Serrano, Cristina; Andreu, Yolanda			Perceived Emotional Intelligence, Subjective Well-Being, Perceived Stress, Engagement and Academic Achievement of Adolescents	REVISTA DE PSICODIDACTICA			Spanish	Article						perceived emotional intelligence; academic engagement; subjective well-being; perceived stress; academic achievement	RELIABILITY; HAPPINESS	This study extends previous research on perceived emotional intelligence (PEI), since it examines the connections between the PEI, perceived stress, subjective well-being, academic engagement, academic performance, age and sex in a sample of adolescents; at the same time that exploring whether perceived stress, subjective well-being and / or academic engagement mediate the relationship between th…	[Serrano, Cristina] Univ Valencia, Dept Personalidad Evaluac & Tratamientos Psicol, Personalidad & Diferencias Individuales, E-46003 Valencia, Spain; [Andreu, Yolanda] Univ Valencia, Educ, E-46003 Valencia, Spain	University of Valencia; University of Valencia	Andreu, Y (corresponding author), Dept Personalidad Evaluac & Tratamientos Psicol, Avda Blasco Ibanez 13, Valencia 46010, Spain.	yolanda.andreu@uv.es	Andreu Vaíllo, Yolanda/G-5862-2011						51	66	80	7	93	ELSEVIER ESPANA	MADRID	CALLE DE ZURBANO, 76-4TH FLR LEFT, MADRID, 28010, SPAIN	1136-1034	2254-4372		REV PSICODIDACT	Rev. Psicodidact.		2016	21	2
J	Sengupta, A; Ray, AS				Sengupta, Abhijit; Ray, Amit S.			University research and knowledge transfer: A dynamic view of ambidexterity in british universities	RESEARCH POLICY			English	Article						Knowledge transfer; Academic engagement; Commercialisation; HE-BCI data; University-industry links; Ambidexterity	TECHNOLOGY-TRANSFER OFFICES; ORGANIZATIONAL AMBIDEXTERITY; IVORY TOWER; US UNIVERSITIES; UK UNIVERSITIES; MEDIATING ROLE; INDUSTRY; PERFORMANCE; IMPACT; INNOVATION	This paper examines the dynamic interlinkages between the two pillars of ambidexterity in universities, research and knowledge transfer. We propose a theoretical model linking these two pillars at the organisational level. The model is tested using the longitudinal HE-BCI survey data juxtaposed against two consecutive rounds of research evaluation in the UK higher education sector. Results indica…	[Sengupta, Abhijit] Univ Essex, Essex Business Sch, Southend On Sea SS1 1LW, England; [Ray, Amit S.] Jawaharlal Nehru Univ, Sch Int Studies, Ctr Int Trade & Dev, New Delhi 110067, India	University of Essex; Jawaharlal Nehru University, New Delhi	Sengupta, A (corresponding author), Univ Essex, Essex Business Sch, Southend On Sea SS1 1LW, England.	asengua@essex.ac.uk; asr0504@mail.jnu.ac.in	Sengupta, Abhijit/IVH-5074-2023	Sengupta, Abhijit/0000-0002-2450-0208	JNU-Essex Development Fund (JEDF); Jawaharlal Nehru University (JNU), India; ESRC	JNU-Essex Development Fund (JEDF); Jawaharlal Nehru University (JNU), India; ESRC(UK Research & Innovation (UKRI)Economic & Social Research Council (ESRC))	This project was funded by the JNU-Essex Development Fund (JEDF) administered by University of Essex, UK and Jawaharlal Nehru University (JNU), India. The authors would like to thank Dr. Janice Pittis and Ville Karhusaari from the Research and Enterprise Office at Essex for their constant support and access to the data. A special note of thanks to Dr Luis Figueroa, who as the Research Associate o…		94	66	69	13	155	ELSEVIER SCIENCE BV	AMSTERDAM	PO BOX 211, 1000 AE AMSTERDAM, NETHERLANDS	0048-7333	1873-7625		RES POLICY	Res. Policy	JUN	2017	46	5
J	Maggin, DM; Pustejovsky, JE; Johnson, AH				Maggin, Daniel M.; Pustejovsky, James E.; Johnson, Austin H.			A Meta-Analysis of School-Based Group Contingency Interventions for Students With Challenging Behavior: An Update	REMEDIAL AND SPECIAL EDUCATION			English	Article						evidence-based practice; single-subject; research methodology; meta-analysis; management; behavior	SINGLE-CASE RESEARCH; CLASSROOM MANAGEMENT STRATEGIES; INCREASE ACADEMIC ENGAGEMENT; ROBUST VARIANCE-ESTIMATION; CLASS-WIDE INTERVENTION; DIFFERENCE EFFECT SIZE; DISRUPTIVE BEHAVIOR; ELEMENTARY STUDENTS; GROUP CONSEQUENCES; META-REGRESSION	Group contingencies are recognized as a potent intervention for addressing challenging student behavior in the classroom, with research reviews supporting the use of this intervention platform going back more than four decades. Over this time period, the field of education has increasingly emphasized the role of research evidence for informing practice, as reflected in the increased use of system…	[Maggin, Daniel M.] Univ Illinois, 1040 W Harrison St,M-C 147, Chicago, IL 60607 USA; [Pustejovsky, James E.] Univ Texas Austin, Austin, TX 78712 USA; [Johnson, Austin H.] Univ Calif Riverside, Riverside, CA 92521 USA	University of Illinois System; University of Illinois Chicago; University of Illinois Chicago Hospital; University of Texas System; University of Texas Austin; University of California System; University of California Riverside	Maggin, DM (corresponding author), Univ Illinois, 1040 W Harrison St,M-C 147, Chicago, IL 60607 USA.	dmaggin@uic.edu		Johnson, Austin/0000-0002-6349-0049					79	66	86	0	15	SAGE PUBLICATIONS INC	THOUSAND OAKS	2455 TELLER RD, THOUSAND OAKS, CA 91320 USA	0741-9325	1538-4756		REM SPEC EDUC	Remedial Spec. Educ.	NOV-DEC	2017	38	6
J	Mårtensson, K; Roxå, T; Olsson, T				Martensson, Katarina; Roxa, Torgny; Olsson, Thomas			Developing a quality culture through the Scholarship of Teaching and Learning	HIGHER EDUCATION RESEARCH & DEVELOPMENT			English	Article						academic freedom; culture; identity; leadership; Scholarship of Teaching and Learning	POLICY	The critical features of a strategy to promote improved teaching and learning are explored in this article from a socio-cultural perspective in a research-intensive institution. The paper presents theoretical underpinnings and implications as well as an empirical case study of such a strategy and its seemingly successful results. The strategy builds on Scholarship of Teaching and Learning beyond …	[Martensson, Katarina] Lund Univ, Ctr Educ Dev, S-22100 Lund, Sweden; [Roxa, Torgny; Olsson, Thomas] Lund Univ, Fac Engn, S-22100 Lund, Sweden	Lund University; Lund University	Mårtensson, K (corresponding author), Lund Univ, Ctr Educ Dev, S-22100 Lund, Sweden.	katarina.martensson@ced.lu.se	Mårtensson, Katarina/J-7319-2019	Mårtensson, Katarina/0000-0002-7837-4382; Roxa, Torgny/0000-0002-0121-4807					33	65	69	1	44	ROUTLEDGE JOURNALS, TAYLOR & FRANCIS LTD	ABINGDON	4 PARK SQUARE, MILTON PARK, ABINGDON OX14 4RN, OXFORDSHIRE, ENGLAND	0729-4360			HIGH EDUC RES DEV	High. Educ. Res. Dev.		2011	30	1
J	Zhang, YY; Qin, XN; Ren, P				Zhang, Yunyun; Qin, Xingna; Ren, Ping			Adolescents' academic engagement mediates the association between Internet addiction and academic achievement: The moderating effect of classroom achievement norm	COMPUTERS IN HUMAN BEHAVIOR			English	Article						Adolescence; Internet addiction; Academic engagement; Academic disaffection; Academic achievement	SCHOOL ENGAGEMENT; PEER GROUP; BEHAVIORAL ENGAGEMENT; MULTILEVEL MODELS; SELF-PERCEPTIONS; STUDENT; CONTEXT; PARTICIPATION; RELATEDNESS; ELEMENTARY	Although the association between Internet addiction and academic achievement has been widely observed in adolescents in recent years, little is known about the mechanisms of Internet addiction and its adverse effects on academic achievement in terms of individual factors and classroom contexts. The present study examined the relationship between Internet addiction and academic outcomes, the media…	[Zhang, Yunyun; Qin, Xingna; Ren, Ping] Beijing Normal Univ, Collaborat Innovat Ctr Assessment Basic Educ Qual, Beijing 100875, Peoples R China	Beijing Normal University	Ren, P (corresponding author), Beijing Normal Univ, Collaborat Innovat Ctr Assessment Basic Educ Qual, Beijing 100875, Peoples R China.	renping@bnu.edu.cn		Qin, Xingna/0000-0002-3662-8348	Young Scholar Project of Beijing Education Sciences Planning Program during the 13th Five-Year Plan [BCEA16022]	Young Scholar Project of Beijing Education Sciences Planning Program during the 13th Five-Year Plan	This research was supported by Young Scholar Project of Beijing Education Sciences Planning Program during the 13th Five-Year Plan (No. BCEA16022).		63	65	69	14	136	PERGAMON-ELSEVIER SCIENCE LTD	OXFORD	THE BOULEVARD, LANGFORD LANE, KIDLINGTON, OXFORD OX5 1GB, ENGLAND	0747-5632	1873-7692		COMPUT HUM BEHAV	Comput. Hum. Behav.	DEC	2018	89
J	Gillen-O'Neel, C				Gillen-O'Neel, Cari			Sense of Belonging and Student Engagement: A Daily Study of First- and Continuing-Generation College Students	RESEARCH IN HIGHER EDUCATION			English	Article						Sense of belonging; Emotional engagement; Behavioral engagement; First-generation college students; Daily diary	SCHOOL ENGAGEMENT; 1ST-GENERATION STUDENTS; AFRICAN-AMERICAN; SOCIAL-CLASS; ACADEMIC ENGAGEMENT; IDENTITY; ADOLESCENTS; MOTIVATION; SUCCESS; NEED	To date, most research on sense of belonging in higher education has relied upon between-person correlations (e.g., Murphy and Zirkel in Teach Coll Rec 117(12):1-40, 2015; Ostrove and Long in Rev High Educ 30(4):363-389, 2007). In the current study, first- and continuing-generation college students (N = 280) reported their sense of belonging and their emotional and behavioral engagement in colleg…	[Gillen-O'Neel, Cari] Macalester Coll, 1600 Grand Ave, St Paul, MN 55105 USA	Macalester College	Gillen-O'Neel, C (corresponding author), Macalester Coll, 1600 Grand Ave, St Paul, MN 55105 USA.	cgilleno@macalester.edu							87	65	121	8	49	SPRINGER	NEW YORK	ONE NEW YORK PLAZA, SUITE 4600, NEW YORK, NY, UNITED STATES	0361-0365	1573-188X		RES HIGH EDUC	Res. High. Educ.	FEB	2021	62	1
J	Pan, ZW; Wang, YL; Derakhshan, A				Pan, Ziwen; Wang, Yongliang; Derakhshan, Ali			Unpacking Chinese EFL Students' Academic Engagement and Psychological Well-Being: The Roles of Language Teachers' Affective Scaffolding	JOURNAL OF PSYCHOLINGUISTIC RESEARCH			English	Article						Academic engagement; EFL students; EFL teacher; Psychological well-being; Teachers; Affective scaffolding	SELF-EFFICACY; EMOTIONAL INTELLIGENCE; WORK ENGAGEMENT; PERSONALITY; MOTIVATION; WILLINGNESS; ACHIEVEMENT; COMMUNICATE; SATISFACTION; EXPERIENCES	Over the past decade, there has appeared a surge of research interest in language learners' academic engagement and psychological well-being as important factors in improving the quality of education. However, research on the roles of English as a foreign language (EFL) teachers' affective scaffolding in enhancing the academic engagement and psychological well-being of their students is relativel…	[Pan, Ziwen] Henan Univ, Sch Foreign Languages, Kaifeng, Peoples R China; [Wang, Yongliang] Nanjing Normal Univ, Sch Foreign Languages & Cultures, Nanjing, Peoples R China; [Derakhshan, Ali] Golestan Univ, Fac Humanities & Social Sci, Dept English Language & Literature, Gorgan, Iran	Henan University; Nanjing Normal University; Golestan University	Derakhshan, A (corresponding author), Golestan Univ, Fac Humanities & Social Sci, Dept English Language & Literature, Gorgan, Iran.	Godfreyeducation@163.com; a.derakhshan@gu.ac.ir	Derakhshan, Ali/AAJ-4592-2020	Derakhshan, Ali/0000-0002-6639-9339; Wang, Yongliang/0000-0002-4672-8481					104	65	65	84	125	SPRINGER/PLENUM PUBLISHERS	NEW YORK	233 SPRING ST, NEW YORK, NY 10013 USA	0090-6905	1573-6555		J PSYCHOLINGUIST RES	J. Psycholinguist. Res.	OCT	2023	52	5
J	Estévez, E; Jiménez, TI; Moreno, D				Estevez, Estefaina; Jimenez, Teresa I.; Moreno, David			Aggressive behavior in adolescence as a predictor of personal, family, and school adjustment problems	PSICOTHEMA			English	Article						Adolescence; aggressive behavior; personal adjustment; school adjustment; family adjustment	SOCIAL CLIMATE; SATISFACTION; LIFE; VICTIMIZATION; DEPRESSION; VIOLENCE; SCALE	Background: The goal of the present study was to determine the extent to which aggressive behavior towards peers predicts greater personal, school, and family maladjustment in adolescent aggressors of both sexes. Method: The sample consisted of 1510 Spanish adolescents from 12 to 17 years old, who anonymously and voluntarily completed self-report questionnaires. Results: Binary Logistic regressio…	[Estevez, Estefaina] Univ Miguel Hernandez Elche, Elche, Spain; [Jimenez, Teresa I.] Univ Zaragoza, Zaragoza, Spain; [Moreno, David] Univ Pablo de Olavide, Seville, Spain	Universidad Miguel Hernandez de Elche; University of Zaragoza; Universidad Pablo de Olavide	Estévez, E (corresponding author), Univ Miguel Hernandez Elche, Dept Psicol Salud, Elche 03202, Spain.	eestevez@umh.es	Moreno-Ruiz, David/L-8115-2017; Gutiérrez, Teresa Isabel Jiménez/JFJ-2236-2023; Gutiérrez, Teresa Isabel Jiménez/G-9258-2011; ESTEVEZ, ESTEFANIA/G-3477-2011	Moreno-Ruiz, David/0000-0003-1221-2097; Gutiérrez, Teresa Isabel Jiménez/0000-0002-5187-3683; Gutiérrez, Teresa Isabel Jiménez/0000-0002-5187-3683; ESTEVEZ, ESTEFANIA/0000-0002-2662-2735	project Bullying, ciberbullying y violencia filio-parental en la adolescencia [PSI2015-65683-P]; Ministry of Economy and Competitiveness of Spain; European Union though the Fondo Europeo de Desarrollo Regional -FEDER- Una manera de hacer Europa	project Bullying, ciberbullying y violencia filio-parental en la adolescencia; Ministry of Economy and Competitiveness of Spain(Spanish Government); European Union though the Fondo Europeo de Desarrollo Regional -FEDER- Una manera de hacer Europa	This study was funded by the project Bullying, ciberbullying y violencia filio-parental en la adolescencia Reference: PSI2015-65683-P [MINECO/FEDER, UE], and subsidized by the Ministry of Economy and Competitiveness of Spain, and the European Union though the Fondo Europeo de Desarrollo Regional -FEDER- Una manera de hacer Europa.		54	64	78	6	51	COLEGIO OFICIAL DE PSICOLOGOS DE ASTURIAS	OVIEDO	ILDEFONSO S. DEL RIO, 4-1 B, 33001 OVIEDO, SPAIN	0214-9915	1886-144X		PSICOTHEMA	Psicothema	FEB	2018	30	1
J	Li, L; Chen, X; Li, H				Li, Ling; Chen, Xu; Li, Hui			Bullying victimization, school belonging, academic engagement and achievement in adolescents in rural China: A serial mediation model	CHILDREN AND YOUTH SERVICES REVIEW			English	Article						Bullying victimization; School belonging; Academic engagement; Academic achievement	PEER VICTIMIZATION; DEPRESSION SYMPTOMS; GENDER-DIFFERENCES; CHILDHOOD; SENSE; AGGRESSION; CHILDREN; VICTIMS; MIDDLE; CONNECTEDNESS	This study aims to understand how bullying victimization impacts on adolescents' academic achievement through the serial mediation of school belonging and academic engagement in rural China. Altogether 813 rural adolescents in southwestern China (359 boys, 454 girls, M age = 15 years, SD = 0.00) completed the Multidimensional Peer Victimization Scale-Revised (MPVS-R), Psychological Sense of Schoo…	[Li, Ling; Chen, Xu] Southwest Univ, Ctr Educ Policy, Chongqing, Peoples R China; [Li, Hui] Macquarie Univ, Sydney, NSW, Australia	Southwest University - China; Macquarie University	Chen, X (corresponding author), Southwest Univ, Fac Educ, Ctr Educ Policy, Chongqing, Peoples R China.	chun1122@email.swu.edu.cn	Li, Hui/AAM-1224-2020; Li, Ling/E-1222-2012	Li, Hui/0000-0001-9355-1116; Chen, Xu/0000-0002-7419-4181	2018 Annual National Social Science and Humanity Key Fund [18ZDA338]; Government Fund for Higher Education Institution [SWU1709104]	2018 Annual National Social Science and Humanity Key Fund; Government Fund for Higher Education Institution	This research was jointly supported by the 2018 Annual National Social Science and Humanity Key Fund (18ZDA338) and the Government Fund for Higher Education Institution (SWU1709104).		78	64	66	7	139	PERGAMON-ELSEVIER SCIENCE LTD	OXFORD	THE BOULEVARD, LANGFORD LANE, KIDLINGTON, OXFORD OX5 1GB, ENGLAND	0190-7409	1873-7765		CHILD YOUTH SERV REV	Child. Youth Serv. Rev.	JUN	2020	113
J	Creed, PA; French, J; Hood, M				Creed, Peter A.; French, Jessica; Hood, Michelle			Working while studying at university: The relationship between work benefits and demands and engagement and well-being	JOURNAL OF VOCATIONAL BEHAVIOR			English	Article						Work university conflict; Work university facilitation; Work-based benefits; Work-based demands; Engagement; Eell-being; Role-conflict; Depletion; Enrichment; Working while studying	FAMILY CONFLICT; JOB CHARACTERISTICS; SCHOOL CONFLICT; COLLEGE; STUDENTS; OUTCOMES; BALANCE; FACILITATION; ADOLESCENTS; PERFORMANCE	We tested a role-conflict, depletion, and enrichment model, in which work-based benefits (enabling resources, psychological rewards, and psychological involvement) and work-based demands (time-, strain-, and behaviour-based demands, and hours worked) were antecedents to work university conflict and work university facilitation, which, in turn, were antecedent to students' academic engagement (ded…	Griffith Univ, Sch Appl Psychol, Parklands, Qld 4222, Australia; Griffith Univ, Griffith Hlth Inst, Parklands, Qld 4222, Australia	Griffith University; Griffith University	Creed, PA (corresponding author), Griffith Univ, Parklands, Qld 4222, Australia.	p.creed@griffith.edu.au	Hood, Michelle/AAI-4000-2021; Hood, Michelle/Q-9787-2019	Hood, Michelle/0000-0002-2240-030X; Hood, Michelle/0000-0002-2240-030X; Creed, Peter A/0000-0002-8671-501X					70	63	72	12	97	ACADEMIC PRESS INC ELSEVIER SCIENCE	SAN DIEGO	525 B ST, STE 1900, SAN DIEGO, CA 92101-4495 USA	0001-8791	1095-9084		J VOCAT BEHAV	J. Vocat. Behav.	FEB	2015	86
J	Matheson, AS; Shriver, MD				Matheson, AS; Shriver, MD			Training teachers to give effective commands: Effects on student compliance and academic behaviors	SCHOOL PSYCHOLOGY REVIEW			English	Article							DISRUPTIVE BEHAVIORS; GENERAL-EDUCATION; NONCOMPLIANCE; CONSULTATION; CHILD; INTERVENTION; SCHOOL	This study examined the effects of effective command training with teachers on students' compliance rates and academic engagement. Three target students were selected who were exhibiting compliance rates substantially below peers. The students' teachers were taught how to provide effective commands. Results indicated that students' rates of compliance increased with increased use of effective com…	Univ Nebraska, Med Ctr, Lincoln, NE 68583 USA; Iowa Heartland Area Educ Agcy 11, Johnston, IA USA	University of Nebraska System; University of Nebraska Lincoln; University of Nebraska Medical Center	Munroe Meyer Inst, Dept Psychol, Nebraska Med Ctr 985450, Omaha, NE 68198 USA.	Mshriver@unmc.edu							38	62	108	0	7	NATL ASSOC SCHOOL PSYCHOLOGISTS	BETHESDA	4340 EAST WEST HWY, STE 402, BETHESDA, MD 20814 USA	0279-6015			SCHOOL PSYCHOL REV	Sch. Psychol. Rev.		2005	34	2
J	Chen, JJL				Chen, Jennifer Jun-Li			Grade-level differences - Relations of parental, teacher and peer support to academic engagement and achievement among Hong Kong students	SCHOOL PSYCHOLOGY INTERNATIONAL			English	Article						academic achievement; academic engagement; academic support; grade-level differences; Hong Kong students; parental support; peer support; teacher support	GENDER DIFFERENCES; MIDDLE SCHOOL; ADOLESCENTS; PERCEPTIONS; INVOLVEMENT; AUTONOMY; MOTIVATION; ORIENTATION; ADJUSTMENT; STYLES	Researchers have long been interested in understanding factors affecting student achievement. To contribute new insights to the literature, this study investigated grade-level differences in the relationships of students' perceived academic support (from parents, teachers and peers) to academic achievement directly and also indirectly through their perceived academic engagement. Questionnaire dat…	Kean Univ, Dept Early Childhood & Family Studies, Union, NJ 07083 USA	Kean University	Chen, JJL (corresponding author), Kean Univ, Dept Early Childhood & Family Studies, 1000 Morris Ave, Union, NJ 07083 USA.	jchen@kean.edu		Chen, Jennifer J/0000-0003-3181-0033					45	62	84	7	58	SAGE PUBLICATIONS LTD	LONDON	1 OLIVERS YARD, 55 CITY ROAD, LONDON EC1Y 1SP, ENGLAND	0143-0343	1461-7374		SCHOOL PSYCHOL INT	Sch. Psychol. Int.	MAY	2008	29	2
J	Cihak, DF; Wright, R; Ayres, KM				Cihak, David F.; Wright, Rachel; Ayres, Kevin M.			Use of Self-Modeling Static-Picture Prompts via a Handheld Computer to Facilitate Self-Monitoring in the General Education Classroom	EDUCATION AND TRAINING IN AUTISM AND DEVELOPMENTAL DISABILITIES			English	Article							PHOTOGRAPHIC ACTIVITY SCHEDULES; COOPERATIVE LEARNING GROUPS; MENTALLY-RETARDED STUDENTS; VOCATIONAL TASKS; ON-SCHEDULE; AUTISM; CHILDREN; DISABILITIES; INTERVENTIONS; INSTRUCTION	This study was designed to evaluate the effects of a combined self-monitoring and static self-model Prompts procedure on the academic engagement of three students with autism served in general education classrooms. The percentage of intervals engaged academically and the number of teacher prompts was analyzed in the context of a multiple probe across settings design with an embedded A-B-A-B. Resu…	[Cihak, David F.; Wright, Rachel] Univ Tennessee, Knoxville, TN 37996 USA; [Ayres, Kevin M.] Univ Georgia, Athens, GA 30602 USA	University of Tennessee System; University of Tennessee Knoxville; University System of Georgia; University of Georgia	Cihak, DF (corresponding author), Univ Tennessee, A412 Bailey Educ Complex, Knoxville, TN 37996 USA.	dcihak@utk.edu	Ayres, Kevin/AFN-0947-2022	Ayres, Kevin/0000-0002-7166-5742; Cihak, David/0000-0002-9788-9998					56	62	88	0	13	COUNCIL EXCEPTIONAL CHILDREN	ARLINGTON	1110 N GLEBE RD, ARLINGTON, VA 22201-5704 USA	2154-1647			EDUC TRAIN AUTISM DE	Educ. Train. Autism Dev. Disabil.	MAR	2010	45	1
J	Maynard, BR; Vaughn, MG; Nelson, EJ; Salas-Wrigh, CP; Heyne, DA; Kremer, KP				Maynard, Brandy R.; Vaughn, Michael G.; Nelson, Erik J.; Salas-Wrigh, Christopher P.; Heyne, David A.; Kremer, Kristen P.			Truancy in the United States: Examining temporal trends and correlates by race, age, and gender	CHILDREN AND YOUTH SERVICES REVIEW			English	Article						Truancy; Delinquency; Substance use; School attendance problems; School engagement	SKIPPING SCHOOL; SUBSTANCE USE; DRUG-USE; BEHAVIOR; YOUTH; DELINQUENCY; ABSENTEEISM; ADOLESCENCE; PREVALENCE; STUDENTS	Background: Truancy has long been regarded a common problem in urgent need of effective intervention. Knowledge about factors associated with truancy can guide the development and implementation of interventions. Method: This paper examined trends in truancy rates between 2002 and 2014 and correlates of truancy across racial/ethnic groups. Variables of interest included sociodemographic factors (…	[Maynard, Brandy R.; Vaughn, Michael G.; Kremer, Kristen P.] St Louis Univ, Coll Publ Hlth & Social Justice, Sch Social Work, Tegeler Hall,3550 Lindell Blvd, St Louis, MO 63103 USA; [Nelson, Erik J.] Indiana Univ, Dept Epidemiol & Biostat, Sch Publ Hlth Bloomington, 1025 E 7th St, Bloomington, IN 47405 USA; [Salas-Wrigh, Christopher P.] Boston Univ, Sch Social Work, Boston, MA 02215 USA; [Heyne, …	Saint Louis University; Indiana University System; Indiana University Bloomington; Boston University; Leiden University - Excl LUMC; Leiden University	Maynard, BR (corresponding author), St Louis Univ, Coll Publ Hlth & Social Justice, Sch Social Work, Tegeler Hall,3550 Lindell Blvd, St Louis, MO 63103 USA.	bmaynar1@slu.edu; eriknels@indiana.edu; cpsw@bu.edu; heyne@fsw.leidenuniv.nl	Nelson, Erik/R-7239-2019; Heyne, David/AGK-0530-2022; Vaughn, Michael/W-2694-2019	Nelson, Erik/0000-0003-1658-8294; Maynard, Brandy/0000-0002-9356-7318	NIDA NIH HHS [R25 DA030310, K05 DA015799] Funding Source: Medline	NIDA NIH HHS(United States Department of Health & Human ServicesNational Institutes of Health (NIH) - USANIH National Institute on Drug Abuse (NIDA))			45	62	93	1	40	PERGAMON-ELSEVIER SCIENCE LTD	OXFORD	THE BOULEVARD, LANGFORD LANE, KIDLINGTON, OXFORD OX5 1GB, ENGLAND	0190-7409	1873-7765		CHILD YOUTH SERV REV	Child. Youth Serv. Rev.	OCT	2017	81
J	Gutiérrez, M; Tomás, JM; Romero, I; Barrica, JM				Gutierrez, Melchor; Tomas, Jose-Manuel; Romero, Isabel; Barrica, Jose-Marcos			Perceived Social Support, School Engagement and Satisfaction With School	REVISTA DE PSICODIDACTICA			Spanish	Article						Perceived social support; School engagement; Satisfaction with school; Adolescents; Angola	STUDENT ENGAGEMENT; ACADEMIC-ACHIEVEMENT; PEER; BEHAVIORS; INTERPLAY; TEACHERS; CONTEXT; MIDDLE	There is evidence that social support from families, peers and teachers has an influence on student engagement, academic success, and satisfaction with school. The aim of this work is to use structural equations to analyse the effects of the perceived academic support and the school engagement on the satisfaction with school. A battery of measurement tools was administered to 2,028 Angolan studen…	[Gutierrez, Melchor; Tomas, Jose-Manuel] Univ Valencia, Valencia, Spain; [Romero, Isabel] Univ Katyavala Bwila, Benguela, Angola; [Barrica, Jose-Marcos] Univ Agostinho Neto, Luanda, Angola	University of Valencia; Universidade Katyavala Bwila; University Agostinho Neto	Gutiérrez, M (corresponding author), Univ Valencia, Valencia, Spain.	melchorg@uv.es	Gutiérrez, Melchor/O-8289-2015	Tomas, Jose Manuel/0000-0002-3424-1668					45	62	69	5	58	ELSEVIER ESPANA	MADRID	CALLE DE ZURBANO, 76-4TH FLR LEFT, MADRID, 28010, SPAIN	1136-1034	2254-4372		REV PSICODIDACT	Rev. Psicodidact.		2017	22	2
J	Toscano, CVA; Carvalho, HM; Ferreira, JP				Toscano, Chrystiane V. A.; Carvalho, Humberto M.; Ferreira, Jose P.			Exercise Effects for Children With Autism Spectrum Disorder: Metabolic Health, Autistic Traits, and Quality of Life	PERCEPTUAL AND MOTOR SKILLS			English	Article						obesity; multilevel modeling; mental health; developmental disorders; psychometric tests; ASD	ATTENTION-DEFICIT/HYPERACTIVITY DISORDER; SELF-STIMULATORY BEHAVIOR; LARGE CLINICAL-SAMPLE; TO-HEIGHT RATIO; PHYSICAL-ACTIVITY; ACADEMIC ENGAGEMENT; ANTECEDENT EXERCISE; CHILDHOOD AUTISM; AEROBIC EXERCISE; OBESITY	This study examined the effects of a 48-week exercise-based intervention on the metabolic profile, autism traits, and perceived quality of life in children with autism spectrum disorder (ASD). We randomly allocated 64 children with ASD (aged 6-12 years) to experimental (n = 46) and control groups (n = 18) and used multilevel regression modeling to examine responses to receiving or not receiving t…	[Toscano, Chrystiane V. A.; Ferreira, Jose P.] Univ Coimbra, Fac Phys Educ, Coimbra, Portugal; [Toscano, Chrystiane V. A.] Univ Fed Alagoas, Fac Phys Educ, Maceio, AL, Brazil; [Carvalho, Humberto M.] Univ Fed Santa Catarina, Fac Phys Educ, Florianopolis, SC, Brazil	Universidade de Coimbra; Universidade Federal de Alagoas; Universidade Federal de Santa Catarina (UFSC)	Toscano, CVA (corresponding author), Univ Fed Alagoas, Phys Educ Course, Av Lourival Melo Mota S-N, BR-57072900 Maceio, AL, Brazil.	chrystoscanopt@gmail.com	Carvalho, Humberto M./E-5698-2014; Ferreira, José Pedro/AGD-5742-2022	Carvalho, Humberto M./0000-0002-2855-0296; Ferreira, Jose/0000-0002-4427-3276					68	62	83	11	122	SAGE PUBLICATIONS INC	THOUSAND OAKS	2455 TELLER RD, THOUSAND OAKS, CA 91320 USA	0031-5125	1558-688X		PERCEPT MOTOR SKILL	Percept. Mot. Skills	FEB	2018	125	1
J	Huggins, R; Prokop, D; Thompson, P				Huggins, Robert; Prokop, Daniel; Thompson, Piers			Universities and open innovation: the determinants of network centrality	JOURNAL OF TECHNOLOGY TRANSFER			English	Article						Universities; University-industry links; Open innovation; Network centrality; Regions; I23; O31; O32; O33; O34	RESEARCH-AND-DEVELOPMENT; TECHNOLOGY-TRANSFER OFFICES; REGIONAL ECONOMIC-DEVELOPMENT; KNOWLEDGE NETWORKS; SPIN-OUT; COLLABORATION NETWORKS; STRUCTURAL HOLES; INTERORGANIZATIONAL COLLABORATION; INDUSTRY COLLABORATION; ACADEMIC ENGAGEMENT	This paper addresses the 'network' and 'open innovation' paradigms by seeking to examine the factors associated with structural positioning within university-industry networks. Drawing upon a network analysis of knowledge-based ties held by universities across the regions of the UK, it is found that those universities with the most central positions (network centrality) within university-industry…	[Huggins, Robert; Prokop, Daniel] Cardiff Univ, Sch Geog & Planning, Cardiff, Wales; [Thompson, Piers] Nottingham Trent Univ, Nottingham Business Sch, Nottingham, England	Cardiff University; University of Nottingham; Nottingham Trent University	Huggins, R (corresponding author), Cardiff Univ, Sch Geog & Planning, Cardiff, Wales.	hugginsr@cardiff.ac.uk; prokopd@cardiff.ac.uk; piers.thompson@ntu.ac.uk	Thompson, Piers/R-5828-2019	Thompson, Piers/0000-0003-1961-7441					265	62	70	15	139	SPRINGER	NEW YORK	ONE NEW YORK PLAZA, SUITE 4600, NEW YORK, NY, UNITED STATES	0892-9912	1573-7047		J TECHNOL TRANSFER	J. Technol. Transf.	JUN	2020	45	3
J	Campbell, A; Anderson, CM				Campbell, Amy; Anderson, Cynthia M.			CHECK-IN/CHECK-OUT: A SYSTEMATIC EVALUATION AND COMPONENT ANALYSIS	JOURNAL OF APPLIED BEHAVIOR ANALYSIS			English	Article						classrooms; conditioned reinforcement; feedback; schools; token economy	POSITIVE BEHAVIOR SUPPORT; FUNCTIONAL ASSESSMENT; SCHOOL; INTERVENTION; ATTENTION; STUDENTS	Tier 2 interventions are implemented similarly across students and thus serve as an efficient and cost-effective method of behavior support in school settings. Check-in/check-out is a Tier 2 intervention with documented effectiveness (e.g., Hawken & Horner, 2003; Todd, Campbell, Meyer, & Horner, 2008). Key features of the intervention include brief morning and afternoon meetings with the interven…	[Campbell, Amy; Anderson, Cynthia M.] Univ Oregon, Eugene, OR 97403 USA	University of Oregon	Anderson, CM (corresponding author), 5261 Univ Oregon, Dept Special Educ & Clin Sci, Eugene, OR 97403 USA.	canders@uoregon.edu							27	61	118	3	12	JOURNAL APPL BEHAV ANAL	LAWRENCE	DEPT HUMAN DEVELOPMENT, UNIV KANSAS, LAWRENCE, KS 66045 USA	0021-8855			J APPL BEHAV ANAL	J. Appl. Behav. Anal.	SUM	2011	44	2
J	Shih, SS				Shih, Shu-Shen			Perfectionism, Implicit Theories of Intelligence, and Taiwanese Eighth-Grade Students' Academic Engagement	JOURNAL OF EDUCATIONAL RESEARCH			English	Article						academic emotions; contingent self-worth; implicit theories of intelligence; perfectionism; self-handicapping	ACHIEVEMENT GOALS; CLINICAL PERFECTIONISM; INDIVIDUAL-DIFFERENCES; PERFORMANCE; MOTIVATION; DIMENSIONS; CONTINGENCIES; COMPONENTS; BEHAVIORS; MODEL	The authors attempted to examine how Taiwanese junior high school students' perfectionistic tendencies and implicit theories of intelligence were related to their academic emotions and approach versus avoidance self-regulation, and to determine differences in contingent self-worth, emotions, and self-regulation among students with different subtypes of perfectionism. A total of 481 8th-grade Taiw…	[Shih, Shu-Shen] Natl Chengchi Univ, Inst Teacher Educ, Taipei 11605, Taiwan	National Chengchi University	Shih, SS (corresponding author), Natl Chengchi Univ, Inst Teacher Educ, 64 Sec 2,ZhiNan Rd, Taipei 11605, Taiwan.	shusshen@nccu.edu.tw							61	60	82	3	65	ROUTLEDGE JOURNALS, TAYLOR & FRANCIS LTD	ABINGDON	2-4 PARK SQUARE, MILTON PARK, ABINGDON OX14 4RN, OXON, ENGLAND	0022-0671	1940-0675		J EDUC RES	J. Educ. Res.		2011	104	2
J	de la Fuente, J; Sander, P; Martínez-Vicente, JM; Vera, M; Garzón, A; Fadda, S				de la Fuente, Jesus; Sander, Paul; Martinez-Vicente, Jose M.; Vera, Mariano; Garzon, Angelica; Fadda, Salvattore			Combined Effect of Levels in Personal Self-Regulation and Regulatory Teaching on Meta-Cognitive, on Meta-Motivational, and on Academic Achievement Variables in Undergraduate Students	FRONTIERS IN PSYCHOLOGY			English	Article						personal self-regulation; regulatory teaching; learning approaches; resilience; engagement; confidence; test anxiety; academic achievement	DAVIDSON RESILIENCE SCALE; PERFORMANCE; EMOTIONS; CONFIDENCE; CLASSROOM; BEHAVIOR; CONTEXT	The Theory of Self- vs. Externally-Regulated Learnin (TM) (SRL vs. ERL) proposed different types of relationships among levels of variables in Personal Self-Regulation (PSR) and Regulatory Teaching (RT) to predict the meta-cognitive, meta-motivational and -emotional variables of learning, and of Academic Achievement in Higher Education. The aim of this investigation was empirical in order to vali…	[de la Fuente, Jesus] Univ Almeri, Sch Psychol, Dept Psychol, Educ & Dev Psychol, Almeria, Spain; [de la Fuente, Jesus] Univ Autonoma Chile, Dept Psychol, Associate Res, Santiago, Chile; [Sander, Paul] Arden Univ, Dept Psychol, Coventry, W Midlands, England; [Martinez-Vicente, Jose M.] Univ Almeria, Sch Psychol, Dept Psychol, Almeria, Spain; [Vera, Mariano] Univ Granada, Escuela Univ Maria Inmacu…	Universidad Autonoma de Chile; Universidad de Almeria; University of Granada; University of Sassari	de la Fuente, J (corresponding author), Univ Almeri, Sch Psychol, Dept Psychol, Educ & Dev Psychol, Almeria, Spain.;de la Fuente, J (corresponding author), Univ Autonoma Chile, Dept Psychol, Associate Res, Santiago, Chile.	jfuente@ual.es	MARTINEZ-VICENTE, JOSE MANUEL/J-2288-2017; de la Fuente, Jesús/AAT-2390-2020; de la Fuente, Jesus/H-3781-2014	MARTINEZ-VICENTE, JOSE MANUEL/0000-0003-4831-1628; Garzon, Angelica/0000-0002-6813-5521; de la Fuente, Jesus/0000-0002-1829-9202; Fadda, Salvatore/0000-0003-0465-2754; Sander, Paul/0000-0002-1124-4970	Ministry of Science and Innovation (Spain), [EDU2011-24805]; Federal Funds (European Union); R D Project	Ministry of Science and Innovation (Spain),(Spanish Government); Federal Funds (European Union); R D Project	This research was funded through an R & D Project, ref. EDU2011-24805 (2012-2015) of the Ministry of Science and Innovation (Spain), and with Federal Funds (European Union). http://www.estres.investigacion-psicopedagogica.com/english/seccion.php?idseccion=1.		90	60	66	3	40	FRONTIERS MEDIA SA	LAUSANNE	AVENUE DU TRIBUNAL FEDERAL 34, LAUSANNE, CH-1015, SWITZERLAND	1664-1078			FRONT PSYCHOL	Front. Psychol.	FEB 23	2017	8
J	Kamps, DM; Leonard, B; Potucek, J; GarrisonHarrell, L				Kamps, DM; Leonard, B; Potucek, J; GarrisonHarrell, L			Cooperative learning groups in Reading: An integration strategy for students with autism and general classroom peers	BEHAVIORAL DISORDERS			English	Article							INTERVENTIONS; ACHIEVEMENT; IMPROVE	A reversal design in two classrooms was used to examine the effects of Cooperative Learning Groups (CLGs) for three students with autism and their general education peers. Pretreatment reading instruction consisted of whole language, teacher-led activities including teacher-student discussion of vocabulary, story concepts, main ideas, and story-mapping with reading aloud by individual students. I…	SW MISSOURI STATE UNIV,SPRINGFIELD,MO 65802	Missouri State University	Kamps, DM (corresponding author), UNIV KANSAS,JUNIPER GARDENS CHILDRENS PROJECT,KANSAS CITY,KS 66103, USA.								38	59	88	0	27	COUNCIL CHILDREN BEHAVIORAL DISORDERS	RESTON	1920 ASSOCIATION DR, RESTON, VA 22091-1589				BEHAV DISORDERS	Behav. Disord.	NOV	1995	21	1
J	Cushing, LS; Kennedy, CH				Cushing, LS; Kennedy, CH			Academic effects of providing peer support in general education classrooms on students without disabilities	JOURNAL OF APPLIED BEHAVIOR ANALYSIS			English	Article						peer supports; peer-mediated instruction; general education participation; inclusive education; students with severe disabilities; academic engagement	COOPERATIVE LEARNING GROUPS; HIGH-SCHOOL-STUDENTS; ACHIEVEMENT	We studied the academic effects on peers without disabilities of serving as peer supports for students with disabilities in general education classrooms. Three peers were studied using a range of indicators, including academic engagement, coursework performance, and social validity assessments. Peers assisting a student with disabilities via curricular adaptation, assignment completion, and socia…	UNIV HAWAII,HONOLULU,HI 96822	University of Hawaii System			Kennedy, Craig/AGH-5651-2022	Cushing, Lisa/0000-0001-6789-3083					30	59	99	2	25	JOURNAL APPL BEHAV ANAL	LAWRENCE	DEPT HUMAN DEVELOPMENT, UNIV KANSAS, LAWRENCE, KS 66045	0021-8855			J APPL BEHAV ANAL	J. Appl. Behav. Anal.	SPR	1997	30	1
J	MARTENS, BK; LOCHNER, DG; KELLY, SQ				MARTENS, BK; LOCHNER, DG; KELLY, SQ			THE EFFECTS OF VARIABLE-INTERVAL REINFORCEMENT ON ACADEMIC ENGAGEMENT - A DEMONSTRATION OF MATCHING THEORY	JOURNAL OF APPLIED BEHAVIOR ANALYSIS			English	Article						MATCHING THEORY; ACADEMIC BEHAVIOR; VARIABLE-INTERVAL REINFORCEMENT	BEHAVIOR-THERAPY; LAW; SCHEDULES; DESIGN	The single-alternative form of the matching law has enjoyed extensive support in laboratory research with both animals and humans. However, few data exist concerning its validity as a description of behavior in applied settings. In Experiment 1, 2 fourth-grade students were exposed to variable-interval schedules of social reinforcement contingent on academic engagement. The data for each subject …			MARTENS, BK (corresponding author), SYRACUSE UNIV,DEPT PSYCHOL,430 HUNTINGTON HALL,SYRACUSE,NY 13244, USA.								29	58	87	0	4	JOURNAL APPL BEHAV ANAL	LAWRENCE	DEPT HUMAN DEVELOPMENT, UNIV KANSAS, LAWRENCE, KS 66045	0021-8855			J APPL BEHAV ANAL	J. Appl. Behav. Anal.	SPR	1992	25	1
J	Rock, ML				Rock, ML			Use of strategic self-monitoring to enhance academic engagement, productivity, and accuracy of students with and without exceptionalities	JOURNAL OF POSITIVE BEHAVIOR INTERVENTIONS			English	Article							ON-TASK BEHAVIOR; LEARNING-DISABILITIES; CHILDREN; ATTENTION; ACHIEVEMENT; PERFORMANCE; INSTRUCTION	This study investigated the effects of a strategic self-monitoring intervention (i.e., ACT-REACT) on the academic engagement, nontargeted problem behavior, productivity, and accuracy of students with and without disabilities. Seven boys and two girls of elementary age who received their educational services in two different inclusive classrooms participated in this investigation. The students wer…	Univ Alabama, Coll Educ, Dept Interdisciplinary Teacher Educ, Tuscaloosa, AL 35487 USA	University of Alabama System; University of Alabama Tuscaloosa	Univ Alabama, Coll Educ, Dept Interdisciplinary Teacher Educ, 221 Graves Hall,Box 870232, Tuscaloosa, AL 35487 USA.	mrock@bamaed.ua.edu							49	58	110	1	23	SAGE PUBLICATIONS INC	THOUSAND OAKS	2455 TELLER RD, THOUSAND OAKS, CA 91320 USA	1098-3007	1538-4772		J POSIT BEHAV INTERV	J. Posit. Behav. Interv.	WIN	2005	7	1
J	Shim, SS; Cho, Y; Wang, C				Shim, Sungok Serena; Cho, YoonJung; Wang, Cen			Classroom goal structures, social achievement goals, and adjustment in middle school	LEARNING AND INSTRUCTION			English	Article						Classroom goal structures; Social achievement goals; Academic engagement; Disruptive behavior; Social adjustment	EARLY ADOLESCENTS; PEER ACCEPTANCE; ACADEMIC-ACHIEVEMENT; MEDIATING ROLE; FIT INDEXES; MOTIVATION; ORIENTATIONS; PERCEPTIONS; MODEL; CONSEQUENCES	The current study investigated the mediating role of social achievement goals in the relation between classroom goal structures and academic engagement and social adjustment among 373 middle school students (52.8% female). Students' perceptions of classroom goal structures were measured in Fall; social achievement goals and academic and social outcomes were measured in Spring. Structural equation…	[Shim, Sungok Serena; Wang, Cen] Ball State Univ, Teachers Coll, Muncie, IN 47306 USA; [Cho, YoonJung] Oklahoma State Univ, Stillwater, OK 74078 USA	Ball State University; Oklahoma State University System; Oklahoma State University - Stillwater	Shim, SS (corresponding author), Ball State Univ, Teachers Coll, 2000 W Univ Ave, Muncie, IN 47306 USA.	sshim@bsu.edu; yoonjung.cho@okstate.edu; cwang@bsu.edu	Shim, Sungok Serena/JMQ-6998-2023	Wang, Cen/0000-0002-3151-1466					58	58	87	7	72	PERGAMON-ELSEVIER SCIENCE LTD	OXFORD	THE BOULEVARD, LANGFORD LANE, KIDLINGTON, OXFORD OX5 1GB, ENGLAND	0959-4752	1873-3263		LEARN INSTR	Learn Instr.	FEB	2013	23
J	Owen, J; Quirk, K; Fincham, F				Owen, Jesse; Quirk, Kelley; Fincham, Frank			Toward a More Complete Understanding of Reactions to Hooking Up Among College Women	JOURNAL OF SEX & MARITAL THERAPY			English	Article							SEXUALLY-TRANSMITTED INFECTIONS; YOUNG-ADULTS; CASUAL SEX; STUDENTS; HOOKUPS; RELIABILITY; VALIDITY; ADOLESCENTS; PREDICTORS; FRIENDS	Hooking up, a relatively common behavior among young adults, refers to a casual sexual encounter, ranging from kissing to sexual intercourse, without an expectation of ongoing physical encounters or relational commitment. Reactions to hooking up have examined psychosocial outcomes as a proxy for specific reactions. The present study examined the reactions of 190 college women, with a specific foc…	[Owen, Jesse; Quirk, Kelley] Univ Louisville, Coll Educ & Human Dev, Louisville, KY 40292 USA; [Fincham, Frank] Florida State Univ, Family Inst, Tallahassee, FL 32306 USA	University of Louisville; State University System of Florida; Florida State University	Owen, J (corresponding author), Univ Louisville, RM Coll Educ & Human Dev 320, Louisville, KY 40292 USA.	Jesse.owen@louisville.edu	Fincham, Frank/A-2357-2008	Fincham, Frank/0000-0001-5081-2283					38	58	71	0	15	ROUTLEDGE JOURNALS, TAYLOR & FRANCIS LTD	ABINGDON	2-4 PARK SQUARE, MILTON PARK, ABINGDON OX14 4RN, OXON, ENGLAND	0092-623X	1521-0715		J SEX MARITAL THER	J. Sex Marital Ther.		2014	40	5
J	Merino-Tejedor, E; Hontangas, PM; Boada-Grau, J				Merino-Tejedor, Enrique; Hontangas, Pedro M.; Boada-Grau, Joan			Career adaptability and its relation to self-regulation, career construction, and academic engagement among Spanish university students	JOURNAL OF VOCATIONAL BEHAVIOR			English	Article						Career adapt-abilities; Career construction; Vocational identity; Academic engagement; Academic burnout	ADAPT-ABILITIES SCALE; PSYCHOMETRIC PROPERTIES; EMOTIONAL INTELLIGENCE; SCHOOL BURNOUT; PERSONALITY; RELIABILITY; PREDICTOR; INVENTORY; DEMANDS	This study analyzed the psychometric properties of the Career Adapt-Abilities Scale (CAAS) in a Spanish speaking sample and then its relationships with adaptive readiness (i.e., self regulation), career construction and adapting responses (i.e., vocational coping behaviors), and adaptation results (academic engagement, burnout, and vocational identity). The measures were completed by 577 Spanish …	[Merino-Tejedor, Enrique] Univ Valladolid, Dept Psychol, Fac Educ Segovia, Campus Maria Zambrano,Plaza Univ 1, Segovia 40005, Spain; [Hontangas, Pedro M.] Univ Valencia, Dept Methodol Behav Sci, Ave Blasco Ibanez 21, Valencia 46011, Spain; [Boada-Grau, Joan] Univ Rovira & Virgili, Dept Psychol, Carretera Valls S-N, Tarragona 43005, Spain	Universidad de Valladolid; University of Valencia; Universitat Rovira i Virgili	Merino-Tejedor, E (corresponding author), Univ Valladolid, Dept Psychol, Fac Educ Segovia, Campus Maria Zambrano,Plaza Univ 1, Segovia 40005, Spain.	enrique.merino@uva.es; hontanga@uv.es; joan.boada@urv.cat	; MERINO-TEJEDOR, ENRIQUE/D-5935-2016	Boada-Grau, Joan/0000-0002-1907-6887; MERINO-TEJEDOR, ENRIQUE/0000-0002-5408-7514					48	58	67	9	99	ACADEMIC PRESS INC ELSEVIER SCIENCE	SAN DIEGO	525 B ST, STE 1900, SAN DIEGO, CA 92101-4495 USA	0001-8791	1095-9084		J VOCAT BEHAV	J. Vocat. Behav.	APR	2016	93
J	Oriol, X; Amutio, A; Mendoza, M; Da Costa, S; Miranda, R				Oriol, Xavier; Amutio, Alberto; Mendoza, Michelle; Da Costa, Silvia; Miranda, Rafael			Emotional Creativity as Predictor of Intrinsic Motivation and Academic Engagement in University Students: The Mediating Role of Positive Emotions	FRONTIERS IN PSYCHOLOGY			English	Article						dispositional emotional creativity; class-related emotions; academic engagement; intrinsic motivation; university students	SELF-DETERMINATION THEORY; HIGH-SCHOOL-STUDENTS; CLASSROOM CLIMATE; AUTONOMY SUPPORT; PERFORMANCE; ACHIEVEMENT; INTELLIGENCE; BURNOUT; DISAFFECTION; FACILITATORS	Objective: Emotional creativity (EC) implies experiencing a complex emotional life, which is becoming increasingly necessary in societies that demand innovation and constant changes. This research studies the relation of EC as a dispositional trait with intrinsic motivation (IM) and academic engagement (AE). Methods: A sample of 428 university Chilean students, 36.5% men and 63.5% women, with age…	[Oriol, Xavier] Univ Santiago Chile, Dept Management & Publ Policies, Santiago, Chile; [Amutio, Alberto] Univ Basque Country, Euskal Herriko Unibertsitatea, Fac Psychol, Dept Social Psychol & Methodol,Behav Sci, Donostia San Sebastian, Spain; [Mendoza, Michelle] Univ Autonoma Chile, Fac Educ, Temuco, Chile; [Da Costa, Silvia] Univ Basque Country, Euskal Herriko Unibertsitatea, Dept Social Psychol…	Universidad de Santiago de Chile; University of Basque Country; Universidad Autonoma de Chile; University of Basque Country; Pontificia Universidad Catolica del Peru	Amutio, A (corresponding author), Univ Basque Country, Euskal Herriko Unibertsitatea, Fac Psychol, Dept Social Psychol & Methodol,Behav Sci, Donostia San Sebastian, Spain.	alberto.amutio@ehu.eus	Amutio, Alberto/AAP-7380-2020; da Costa T-6220-2018 correct, Silvia/N-6741-2018; Miranda, Rafael/AAS-5224-2021; da Costa, Silvia/T-6220-2018; dCD, SILVIA/KOD-8354-2024; Oriol, Xavier/AAO-3112-2021	Amutio, Alberto/0000-0003-3989-9992; da Costa T-6220-2018 correct, Silvia/0000-0001-6011-821X; Miranda, Rafael/0000-0001-8640-6439; Oriol, Xavier/0000-0001-7130-7729; Mendoza Lira, Michelle/0000-0003-4275-1841	Basal Financing Program	Basal Financing Program(Comision Nacional de Investigacion Cientifica y Tecnologica (CONICYT)CONICYT PIA/BASAL)	This research was funded by the Basal Financing Program and the Vice-Presidency of Research, Development, and Innovation. Universidad de Santiago de Chile, Usach.		80	58	73	4	92	FRONTIERS MEDIA SA	LAUSANNE	AVENUE DU TRIBUNAL FEDERAL 34, LAUSANNE, CH-1015, SWITZERLAND	1664-1078			FRONT PSYCHOL	Front. Psychol.	AUG 25	2016	7
J	Skinner, CH; Pappas, DN; Davis, KA				Skinner, CH; Pappas, DN; Davis, KA			Enhancing academic engagement: Providing opportunities for responding and influencing students to choose to respond	PSYCHOLOGY IN THE SCHOOLS			English	Article							ON-TASK BEHAVIOR; ADDITIONAL BRIEF PROBLEMS; MATCHING THEORY; AFRICAN-AMERICAN; EMOTIONAL DISTURBANCE; REINFORCER RATE; LEARNING RATES; MATHEMATICS; PERFORMANCE; WORK	Although educators often provide opportunities for students to engage in active academic responding, in many situations, students either cannot or will not respond. In the current article, we analyze the reasons students fail to respond. Practical procedures educators can use to prevent can ' t do problems are provided. Won ' t do problems are conceptualized as choice behaviors. Both applied and …	Univ Tennessee, Coll EHHS, Knoxville, TN 37996 USA	University of Tennessee System; University of Tennessee Knoxville	Univ Tennessee, Coll EHHS, Claxton Complex A-518, Knoxville, TN 37996 USA.	cskinne1@utk.edu							74	57	106	0	9	WILEY	HOBOKEN	111 RIVER ST, HOBOKEN 07030-5774, NJ USA	0033-3085	1520-6807		PSYCHOL SCHOOLS	Psychol. Schools	APR	2005	42	4
J	Lim, CP				Lim, Cher Ping			Global citizenship education, school curriculum and games: Learning Mathematics, English and Science as a global citizen	COMPUTERS & EDUCATION			English	Article						multi-user virtual environment; game-like elements; global citizenship; curriculum; engagement; social commitment	STUDENTS	Based on an account of how two classes of primary five students in Singapore engage in the learning of English, Mathematics and Science by playing the role of global citizens, the paper suggests an alternative but realistic approach to teaching global citizenship education. Set against the back story of Atlantis facing ecological, social and cultural decay due to the blind pursuit of prosperity a…	Edith Cowan Univ, Sch Educ, Asia Pacific Ctr Excellence Teacher Educ & Innovat, Perth, WA 6050, Australia	Edith Cowan University	Lim, CP (corresponding author), Edith Cowan Univ, Sch Educ, Asia Pacific Ctr Excellence Teacher Educ & Innovat, 2 Bradford St,Mt Lawley, Perth, WA 6050, Australia.	c.lim@ecu.edu.au	Lim, Cher Ping/O-6068-2016	Lim, Cher Ping/0000-0002-4797-1870					31	57	77	2	79	PERGAMON-ELSEVIER SCIENCE LTD	OXFORD	THE BOULEVARD, LANGFORD LANE, KIDLINGTON, OXFORD OX5 1GB, ENGLAND	0360-1315			COMPUT EDUC	Comput. Educ.	NOV	2008	51	3
J	Chafouleas, SM; Briesch, AM; Riley-Tillman, TC; Christ, TJ; Black, AC; Kilgus, SP				Chafouleas, Sandra M.; Briesch, Amy M.; Riley-Tillman, T. Chris; Christ, Theodore J.; Black, Anne C.; Kilgus, Stephen P.			An investigation of the generalizability and dependability of Direct Behavior Rating Single Item Scales (DBR-SIS) to measure academic engagement and disruptive behavior of middle school students	JOURNAL OF SCHOOL PSYCHOLOGY			English	Article						Direct Behavior Rating; DBR; Generalizability; Dependability; Behavior assessment	SYSTEMATIC DIRECT OBSERVATION; OFFICE DISCIPLINE REFERRALS; REPORT CARDS; MULTIPLE IMPUTATION; SOCIAL-BEHAVIOR; ACCURACY; VALIDITY; IMPACT; TASK	A total of 4 raters, including 2 teachers and 2 research assistants, used Direct Behavior Rating Single Item Scales (DBR-SIS) to measure the academic engagement and disruptive behavior of 7 middle school students across multiple occasions. Generalizability study results for the full model revealed modest to large magnitudes of variance associated with persons (students), occasions of measurement …	[Chafouleas, Sandra M.] Univ Connecticut, Dept Educ Psychol, Storrs, CT 06269 USA; [Briesch, Amy M.] Northeastern Univ, Boston, MA 02115 USA; [Riley-Tillman, T. Chris] E Carolina Univ, Greenville, NC 27858 USA; [Christ, Theodore J.] Univ Minnesota, Minneapolis, MN 55455 USA; [Black, Anne C.] Yale Univ, New Haven, CT 06520 USA	University of Connecticut; Northeastern University; University of North Carolina; East Carolina University; University of Minnesota System; University of Minnesota Twin Cities; Yale University	Chafouleas, SM (corresponding author), Univ Connecticut, Dept Educ Psychol, U-2064, Storrs, CT 06269 USA.	sandra.chafouleas@uconn.edu		Christ, Theodore/0000-0002-5397-0364; Riley-Tillman, Timothy/0000-0001-7057-0429; Kilgus, Stephen/0000-0003-0218-1004					56	57	78	0	10	PERGAMON-ELSEVIER SCIENCE LTD	OXFORD	THE BOULEVARD, LANGFORD LANE, KIDLINGTON, OXFORD OX5 1GB, ENGLAND	0022-4405	1873-3506		J SCHOOL PSYCHOL	J. Sch. Psychol.	JUN	2010	48	3
J	Hoeppner, BB; Barnett, NP; Jackson, KM; Colby, SM; Kahler, CW; Monti, PM; Read, J; Tevyaw, T; Wood, M; Corriveau, D; Fingeret, A				Hoeppner, Bettina B.; Barnett, Nancy P.; Jackson, Kristina M.; Colby, Suzanne M.; Kahler, Christopher W.; Monti, Peter M.; Read, Jennifer; Tevyaw, Tracy; Wood, Mark; Corriveau, Donald; Fingeret, Allan			Daily College Student Drinking Patterns Across the First Year of College	JOURNAL OF STUDIES ON ALCOHOL AND DRUGS			English	Article							HEAVY ALCOHOL-USE; BINGE-DRINKING; LONGITUDINAL PATTERNS; CONSUMPTION; RISK; 1ST-YEAR; PARTY; INTERVENTIONS; PREDICTORS; MORTALITY	Objective: Despite the long recognized importance and well-documented impact of drinking patterns on health and safety, college student drinking patterns are understudied. This study used a daily-level, academic-year-long, multisite sample to identify subpopulations of college student drinking patterns and to describe how these groups differ from one another before, during, and after their first …	[Hoeppner, Bettina B.; Barnett, Nancy P.; Jackson, Kristina M.; Colby, Suzanne M.; Kahler, Christopher W.; Monti, Peter M.] Brown Univ, Providence, RI 02912 USA; [Monti, Peter M.; Tevyaw, Tracy] Providence Vet Affairs Med Ctr, Providence, RI USA; [Read, Jennifer] SUNY Buffalo, Buffalo, NY 14260 USA; [Wood, Mark] Univ Rhode Isl, Kingston, RI 02881 USA; [Corriveau, Donald] Univ Massachusetts, N Dar…	Brown University; US Department of Veterans Affairs; Veterans Health Administration (VHA); Providence VA Medical Center; State University of New York (SUNY) System; State University of New York (SUNY) Buffalo; University of Rhode Island; University of Massachusetts System; University Massachusetts Dartmouth; Rhode Island College	Hoeppner, BB (corresponding author), Harvard Univ, Sch Med, Ctr Addict Med, Massachusetts Gen Hosp, 60 Staniford St, Boston, MA 02114 USA.	bhoeppner@partners.org		/0000-0003-2027-5936; Jackson, Kristina/0000-0001-5449-5473	National Institute on Alcohol Abuse and Alcoholism [R01AA013970, T32AA007459]; National Institute on Drug Abuse [K01DA027097]	National Institute on Alcohol Abuse and Alcoholism(United States Department of Health & Human ServicesNational Institutes of Health (NIH) - USANIH National Institute on Alcohol Abuse & Alcoholism (NIAAA)); National Institute on Drug Abuse(United States Department of Health & Human ServicesNational Institutes of Health (NIH) - USANIH National Institute on Drug Abuse (NIDA))	This study was supported by National Institute on Alcohol Abuse and Alcoholism Grants R01AA013970 and T32AA007459 and National Institute on Drug Abuse Grant K01DA027097.		59	57	74	0	26	ALCOHOL RES DOCUMENTATION INC CENT ALCOHOL STUD RUTGERS UNIV	PISCATAWAY	C/O DEIRDRE ENGLISH, 607 ALLISON RD, PISCATAWAY, NJ 08854-8001 USA	1937-1888	1938-4114		J STUD ALCOHOL DRUGS	J. Stud. Alcohol Drugs	JUL	2012	73	4
J	Brock, ME; Carter, EW				Brock, Matthew E.; Carter, Erik W.			Efficacy of Teachers Training Paraprofessionals to Implement Peer Support Arrangements	EXCEPTIONAL CHILDREN			English	Article							SINGLE-SUBJECT RESEARCH; INCLUSIVE CLASSROOMS; SOCIAL VALIDITY; DISABILITIES; STUDENTS; ADOLESCENTS; COMMUNICATION; DISORDERS; BEHAVIOR	Although peer support arrangements are a promising strategy to promote inclusion in general education classrooms, previous studies have not addressed how paraprofessionals might implement this strategy under typical circumstances without extensive researcher involvement. In this single-case design study, four special education teachers trained and supported four paraprofessionals to implement pee…	[Brock, Matthew E.] Ohio State Univ, Columbus, OH 43210 USA; [Carter, Erik W.] Vanderbilt Univ, Nashville, TN USA	University System of Ohio; Ohio State University; Vanderbilt University	Brock, ME (corresponding author), Ohio State Univ, Dept Educ Studies, Crane Ctr Early Childhood Educ & Policy, 334 PAES Bldg,305 West 17th Ave, Columbus, OH 43210 USA.	brock.184@osu.edu	Carter, Erik/AAX-3043-2020	Carter, Erik/0000-0001-7153-2782					23	57	83	2	32	SAGE PUBLICATIONS INC	THOUSAND OAKS	2455 TELLER RD, THOUSAND OAKS, CA 91320 USA	0014-4029	2163-5560		EXCEPT CHILDREN	Except. Child.	APR	2016	82	3
J	Hyland, K; Jiang, F				Hyland, Ken; Jiang, Feng (Kevin)			We must conclude that...: A diachronic study of academic engagement	JOURNAL OF ENGLISH FOR ACADEMIC PURPOSES			English	Article						Academic writing; Engagement; Corpus research; Directives; Questions; Shared knowledge	WRITERS; READER; STANCE	Engagement is the way that writers explicitly acknowledge the presence of their readers in a text, drawing them in through readermention, personal asides, appeals to shared knowledge, questions and directives. This is a key rhetorical feature of academic writing and has been a topic of interest to applied linguists for over 20 years. Despite this interest, however, very little is known of how it …	[Hyland, Ken; Jiang, Feng (Kevin)] Univ Hong Kong, Ctr Appl English Studies, Ru Run Shaw Tower,Pok Fu Lam Rd, Hong Kong, Hong Kong, Peoples R China	University of Hong Kong	Hyland, K (corresponding author), Univ Hong Kong, Ctr Appl English Studies, Ru Run Shaw Tower,Pok Fu Lam Rd, Hong Kong, Hong Kong, Peoples R China.	Khyland@hku.hk	Jiang, Kevin/AAT-5052-2021; Hyland, Ken/ABH-8176-2020	Hyland, Ken/0000-0002-4727-8355; Jiang, Kevin/0000-0001-7369-9498					30	57	61	13	81	ELSEVIER	AMSTERDAM	RADARWEG 29, 1043 NX AMSTERDAM, NETHERLANDS	1475-1585	1878-1497		J ENGL ACAD PURP	J. Engl. Acad. Purp.	DEC	2016	24
J	Hockings, C; Cooke, S; Yamashita, H; McGinty, S; Bowl, M				Hockings, Christine; Cooke, Sandra; Yamashita, Hiromi; McGinty, Samantha; Bowl, Marion			Switched off? A study of disengagement among computing students at two universities	RESEARCH PAPERS IN EDUCATION			English	Article						academic engagement; disengagement; learning and teaching; higher education; widening participation; classroom observation	QUALITATIVE DIFFERENCES; ENGAGEMENT	We explore the conditions under which students engage with, or disengage from, learning at university within the context of increased student diversity. We discuss the concept and use of academic engagement and disengagement but focus on the dynamics of disengagement in two comparable first year computing modules at a pre- and a post-1992 university. The findings from this study suggest that ther…	[Hockings, Christine; McGinty, Samantha] Wolverhampton Univ, Wolverhampton, W Midlands, England; [Cooke, Sandra; Yamashita, Hiromi] Univ Birmingham, Birmingham B15 2TT, W Midlands, England; [Bowl, Marion] Univ Canterbury, Canterbury, New Zealand	University of Wolverhampton; University of Birmingham; University of Canterbury	Hockings, C (corresponding author), Wolverhampton Univ, Wolverhampton, W Midlands, England.	C.Hockings@wlv.ac.uk							33	55	67	0	12	ROUTLEDGE JOURNALS, TAYLOR & FRANCIS LTD	ABINGDON	4 PARK SQUARE, MILTON PARK, ABINGDON OX14 4RN, OXFORDSHIRE, ENGLAND	0267-1522			RES PAP EDUC	Res. Pap. Educ.		2008	23	2
J	Shih, SS				Shih, Shu-Shen			The relation of self-determination and achievement goals to Taiwanese eighth graders' behavioral and emotional engagement in schoolwork	ELEMENTARY SCHOOL JOURNAL			English	Article							DETERMINATION THEORY PERSPECTIVE; INTRINSIC MOTIVATION; HIERARCHICAL MODEL; AUTONOMY SUPPORT; INDIVIDUAL-DIFFERENCES; PERCEIVED COMPETENCE; ACADEMIC MOTIVATION; STUDENTS; WELL; INTERNALIZATION	In this study I examined how Taiwanese junior high school students' perceptions of autonomy support were related to their motivational characteristics, and the ability of these constructs to explain students' academic engagement. A total of 343 eighth-grade students completed a self-report survey assessing their perceptions of autonomy support from teachers, achievement goal orientations, self-re…	Natl Chengchi Univ, Inst Teacher Educ, Taipei 11623, Taiwan	National Chengchi University	Shih, SS (corresponding author), Natl Chengchi Univ, Inst Teacher Educ, 64 Chihnan Rd,Sec 2 Wenshan, Taipei 11623, Taiwan.								67	55	87	0	35	UNIV CHICAGO PRESS	CHICAGO	1427 E 60TH ST, CHICAGO, IL 60637-2954 USA	0013-5984			ELEM SCHOOL J	Elem. Sch. J.	MAR	2008	108	4
J	Salamonson, Y; Andrew, S; Everett, B				Salamonson, Yenna; Andrew, Sharon; Everett, Bronwyn			Academic engagement and disengagement as predictors of performance in pathophysiology among nursing students	CONTEMPORARY NURSE			English	Article						academic engagement; academic performance; nursing education; homework; lecture attendance; part-time employment	PART-TIME EMPLOYMENT; LECTURE ATTENDANCE; HIGH-SCHOOL; AFRICAN-AMERICAN; ACHIEVEMENT; HOMEWORK; MATHEMATICS; WORK; PERSISTENCE; PSYCHOLOGY	Connecting students with learning activities to promote academic engagement has been a focus of higher education over the past decade, partly driven by an increasing rate of student participation in part-time employment, and a growing concern about the quality of the student experience. Using a prospective survey design, this study selected three elements of academic engagement (homework completi…	[Salamonson, Yenna; Andrew, Sharon; Everett, Bronwyn] Univ Western Sydney, Sch Nursing & Midwifery, Sydney, NSW, Australia	Western Sydney University	Salamonson, Y (corresponding author), Univ Western Sydney, Sch Nursing & Midwifery, Campbelltown Campus, Sydney, NSW, Australia.		Salamonson, Yenna/G-5751-2011; Everett, Bronwyn Lee/AAT-1308-2021; Salamonson, Yenna/AAX-4499-2020	Salamonson, Yenna/0000-0002-7429-4086; Everett, Bronwyn/0000-0003-1733-7462; Andrew, Sharon/0000-0001-5019-2782					56	55	80	1	20	ECONTENT MANAGEMENT	MALENY	PO BOX 1027, MALENY, QUEENSLAND 4552, AUSTRALIA	1037-6178			CONTEMP NURSE	Contemp. Nurse.	APR-JUN	2009	32	1-2
J	Shim, SS; Finch, WH				Shim, Sungok Serena; Finch, W. Holmes			Academic and social achievement goals and early adolescents' adjustment: A latent class approach	LEARNING AND INDIVIDUAL DIFFERENCES			English	Article						Achievement goal orientations; Social achievement goals; Early adolescence; Academic adjustment; Social adjustment; Middle school	PERFORMANCE-APPROACH GOALS; HELP-SEEKING TENDENCIES; SELF-EFFICACY; STUDENTS MOTIVATION; TASK-VALUE; ORIENTATIONS; SCHOOL; CONSEQUENCES; PERCEPTIONS; PERSPECTIVE	Middle school students pursue both academic and social goals. How to coordinate those strivings has important implications for students academic and social adjustment at school. Confirmatory factor latent class analysis including both academic and social goals was conducted on the data from 440 middle school students. Analyses identified 3 latent classes based on academic goal orientation, and 2 …	[Shim, Sungok Serena; Finch, W. Holmes] Ball State Univ, Teachers Coll, Muncie, IN 47306 USA	Ball State University	Shim, SS (corresponding author), Ball State Univ, Teachers Coll, 2000 W Univ Ave, Muncie, IN 47306 USA.	sshim@bsu.edu; whfinch@bsu.edu	Shim, Sungok Serena/JMQ-6998-2023						66	55	70	1	57	ELSEVIER	AMSTERDAM	RADARWEG 29, 1043 NX AMSTERDAM, NETHERLANDS	1041-6080	1873-3425		LEARN INDIVID DIFFER	Learn. Individ. Differ.	FEB	2014	30
J	Diaz, A; Eisenberg, N; Valiente, C; VanSchyndel, S; Spinrad, TL; Berger, R; Hernandez, MM; Silva, KM; Southworth, J				Diaz, Anjolii; Eisenberg, Nancy; Valiente, Carlos; VanSchyndel, Sarah; Spinrad, Tracy L.; Berger, Rebecca; Hernandez, Maciel M.; Silva, Kassondra M.; Southworth, Jody			Relations of positive and negative expressivity and effortful control to kindergarteners' student-teacher relationship, academic engagement, and externalizing problems at school	JOURNAL OF RESEARCH IN PERSONALITY			English	Article						Behavioral problems; Effortful control; Emotion; Academic engagement; Student-teacher relationships; Temperament	CHILD RELATIONSHIP QUALITY; EMOTION-REGULATION; PROBLEM BEHAVIOR; TEMPERAMENT; ACHIEVEMENT; TRAJECTORIES; PREDICTION; ANTECEDENTS; CONTINUITY; SIMILARITIES	The current study examined the role of naturally-occurring negative and positive emotion expressivity in kindergarten and children's effortful control (EC) on their relationships with teachers, academic engagement, and problems behaviors in school. Further, the potential moderating role of EC on these important school outcomes was assessed. Emotion and engagement were observed at school. EC was a…	[Diaz, Anjolii; Valiente, Carlos; Spinrad, Tracy L.; Berger, Rebecca; Silva, Kassondra M.; Southworth, Jody] Arizona State Univ, T Denny Sanford Sch Social & Family Dynam, Tempe, AZ 85281 USA; [Eisenberg, Nancy; VanSchyndel, Sarah; Hernandez, Maciel M.] Arizona State Univ, Dept Psychol, POB 871104, Tempe, AZ 85287 USA; [Diaz, Anjolii] Ball State Univ, Dept Psychol Sci, Muncie, IN 47306 USA	Arizona State University; Arizona State University-Tempe; Arizona State University; Arizona State University-Tempe; Ball State University	Eisenberg, N (corresponding author), Arizona State Univ, Dept Psychol, POB 871104, Tempe, AZ 85287 USA.	ADiaz6@bsu.edu; Nancy.Eisenberg@asu.edu; Valiente@asu.edu; Svanschy@asu.edu; Tspinrad@asu.edu; Rhberger@asu.edu; Mherna70@asu.edu; Kassondra.Silva@asu.edu; Jody.southworth@asu.edu		Johns, Sarah/0000-0003-3656-3190; Hernandez, Maciel M./0000-0001-8338-5820; Berger, Rebecca/0000-0002-4728-6777	Eunice Kennedy Shriver National Institute of Child Health and Human Development of the National Institutes of Health (NIH) [R01HD068522]	Eunice Kennedy Shriver National Institute of Child Health and Human Development of the National Institutes of Health (NIH)	Research reported in this publication was supported by the Eunice Kennedy Shriver National Institute of Child Health and Human Development of the National Institutes of Health (NIH) (R01HD068522) to Carlos Valiente and Nancy Eisenberg. The content is solely the responsibility of the authors and does not necessarily represent the official views of the NIH.		78	55	70	3	40	ACADEMIC PRESS INC ELSEVIER SCIENCE	SAN DIEGO	525 B ST, STE 1900, SAN DIEGO, CA 92101-4495 USA	0092-6566	1095-7251		J RES PERS	J. Res. Pers.	APR	2017	67
J	Ansong, D; Okumu, M; Bowen, GL; Walker, AM; Eisensmith, SR				Ansong, David; Okumu, Moses; Bowen, Gary L.; Walker, Anne M.; Eisensmith, Sarah R.			The role of parent, classmate, and teacher support in student engagement: Evidence from Ghana	INTERNATIONAL JOURNAL OF EDUCATIONAL DEVELOPMENT			English	Article						Student engagement; Parent support; Classmate support; Teacher support; Structural equation modeling; Sub-Saharan Africa	SCHOOL ENGAGEMENT; CLASSROOM ENGAGEMENT; ACADEMIC-ACHIEVEMENT; SOCIAL SUPPORT; SUCCESS; CONTEXT; HEALTH; FAMILY; ADOLESCENTS; PERFORMANCE	The literature is unequivocal about the importance of improving academic engagement in addressing challenges such as school drop out or increasing student motivation. What is less certain, particularly in the literature from developing countries, is how social support systems (parents, teachers, and classmates) influence students' emotional and behavioral engagement. Drawing from the ecological p…	[Ansong, David; Bowen, Gary L.; Walker, Anne M.; Eisensmith, Sarah R.] Univ N Carolina, Sch Social Work, 325 Pittsboro St,CB 3550, Chapel Hill, NC 27599 USA; [Okumu, Moses] Univ Toronto, Factor Inwentash Fac Social Work, 246 Bloor St W, Toronto, ON M5S 1V4, Canada	University of North Carolina; University of North Carolina Chapel Hill; University of Toronto	Ansong, D (corresponding author), Univ N Carolina, Sch Social Work, 325 Pittsboro St,CB 3550, Chapel Hill, NC 27599 USA.	ansong@email.unc.edu; moses.okumu@mail.utoronto.ca; glbowen@email.unc.edu; walkeram@live.unc.edu; srabiner@live.unc.edu	Okumu, Moses/AAI-7317-2021; Ansong, David/P-6162-2016						70	55	68	12	71	PERGAMON-ELSEVIER SCIENCE LTD	OXFORD	THE BOULEVARD, LANGFORD LANE, KIDLINGTON, OXFORD OX5 1GB, ENGLAND	0738-0593	1873-4871		INT J EDUC DEV	Int. J. Educ. Dev.	MAY	2017	54
J	Olson, KR				Olson, KR			Engagement and self-control: Superordinate dimensions of Big Five traits	PERSONALITY AND INDIVIDUAL DIFFERENCES			English	Article						Big Five traits; engagement; self-control	PERSONALITY-DISORDERS; 5-FACTOR MODEL; ADHD SYMPTOMS; LIFE-SPAN; TEMPERAMENT; EXPERIENCE; ACTIVATION	Two separate factor analyses of Big Five traits have independently identified two higher-order factors. These factors have been interpreted quite differently by their respective researchers. This conceptual paper posits the superordinate personality dimensions of Engagement (engaged versus disengaged) and Self-Control as the common elements of these higher-order factors. A review and integration …	Ft Hays State Univ, Dept Psychol, Hays, KS 67601 USA		Ft Hays State Univ, Dept Psychol, Hays, KS 67601 USA.	kolson@fhsu.edu							48	54	71	0	37	PERGAMON-ELSEVIER SCIENCE LTD	OXFORD	THE BOULEVARD, LANGFORD LANE, KIDLINGTON, OXFORD OX5 1GB, ENGLAND	0191-8869			PERS INDIV DIFFER	Pers. Individ. Differ.	MAY	2005	38	7
J	Machalicek, W; O'Reilly, M; Chan, JM; Lang, R; Rispoli, M; Davis, T; Shogren, K; Sigafoos, J; Lancioni, G; Antonucci, M; Langthorne, P; Andrews, A; Didden, R				Machalicek, Wendy; O'Reilly, Mark; Chan, Jeffrey M.; Lang, Russell; Rispoli, Mandy; Davis, Tonya; Shogren, Karrie; Sigafoos, Jeff; Lancioni, Giulio; Antonucci, Massimo; Langthorne, Paul; Andrews, Alonzo; Didden, Robert			Using Videoconferencing to Conduct Functional Analysis of Challenging Behavior and Develop Classroom Behavioral Support Plans for Students with Autism	EDUCATION AND TRAINING IN DEVELOPMENTAL DISABILITIES			English	Article							YOUNG-CHILDREN; TELEPSYCHIATRY; INTERVENTIONS; TELEMEDICINE; ADULTS	We conducted a functional analysis of challenging behavior for two students with autism using widely available videoconferencing equipment (laptop computers equipped with web cameras). Observers used the videoconferencing facilities to collect data on challenging behavior and to instruct the therapist conducting the assessment. Results of the functional analyses suggested that challenging behavio…	[O'Reilly, Mark] Univ Texas Austin, Dept Special Educ, Univ Stn D5300 1, Austin, TX 78712 USA; [Sigafoos, Jeff] Univ Tasmania, Hobart, Tas 7001, Australia; [Lancioni, Giulio; Antonucci, Massimo] Univ Bari, I-70121 Bari, Italy; [Langthorne, Paul] Univ Kent, Canterbury CT2 7NZ, Kent, England; [Andrews, Alonzo] Autism Treatment Ctr Dallas, Dallas, TX USA; [Andrews, Alonzo] Autism Treatment Ctr San A…	University of Texas System; University of Texas Austin; University of Tasmania; Universita degli Studi di Bari Aldo Moro; University of Kent; Radboud University Nijmegen	O'Reilly, M (corresponding author), Univ Texas Austin, Dept Special Educ, Univ Stn D5300 1, Austin, TX 78712 USA.	markoreilly@mail.utexas.edu	Shogren, Karrie/AGU-9711-2022	Lancioni, Giulio/0000-0002-6515-5690; Shogren, Karrie/0000-0001-7925-1299; Andrews, Alonzo/0000-0003-0565-580X					33	54	84	0	27	COUNCIL EXCEPTIONAL CHILDREN	ARLINGTON	1110 N GLEBE RD, ARLINGTON, VA 22201-5704 USA	1547-0350			EDUC TRAIN DEV DISAB	Educ. Train. Dev. Disabil.	JUN	2009	44	2
J	Staff, J; Schulenberg, JE; Bachman, JG				Staff, Jeremy; Schulenberg, John E.; Bachman, Jerald G.			Adolescent Work Intensity, School Performance, and Academic Engagement	SOCIOLOGY OF EDUCATION			English	Article						teenage employment; school performance; academic engagement; wishing to work	PART-TIME WORK; CHILD LABOR LAWS; SUBSTANCE USE; EMPLOYMENT; CONSEQUENCES; IMPACT; EXPERIENCE; ADJUSTMENT; SUBVERSION; IDENTIFY	Teenagers working more than 20 hours per week perform worse in school than youth who work less. There are two competing explanations for this association: (1) that paid work takes time and effort away from activities that promote achievement, such as completing homework, preparing for examinations, getting help from parents and teachers, and participating in extracurricular activities, and (2) th…	[Staff, Jeremy] Penn State Univ, Dept Sociol, University Pk, PA 16802 USA; [Schulenberg, John E.; Bachman, Jerald G.] Univ Michigan, Inst Social Res, Ann Arbor, MI 48109 USA; [Schulenberg, John E.] Univ Michigan, Ctr Human Growth & Dev, Ann Arbor, MI 48109 USA	Pennsylvania Commonwealth System of Higher Education (PCSHE); Pennsylvania State University; Pennsylvania State University - University Park; University of Michigan System; University of Michigan; University of Michigan System; University of Michigan	Staff, J (corresponding author), Penn State Univ, Dept Sociol, 211 Oswald Tower, University Pk, PA 16802 USA.	jus25@psu.edu	Bachman, Jerald G/J-6324-2014; Schulenberg, John/A-2212-2008	Schulenberg, John/0000-0003-2129-8486	NICHD NIH HHS [K01 HD054467-03, K01 HD054467] Funding Source: Medline; NIDA NIH HHS [R01 DA001411] Funding Source: Medline	NICHD NIH HHS(United States Department of Health & Human ServicesNational Institutes of Health (NIH) - USANIH Eunice Kennedy Shriver National Institute of Child Health & Human Development (NICHD)); NIDA NIH HHS(United States Department of Health & Human ServicesNational Institutes of Health (NIH) - USANIH National Institute on Drug Abuse (NIDA))			54	54	77	0	67	SAGE PUBLICATIONS INC	THOUSAND OAKS	2455 TELLER RD, THOUSAND OAKS, CA 91320 USA	0038-0407	1939-8573		SOCIOL EDUC	Sociol. Educ.	JUL	2010	83	3
J	Jungert, T; Alm, F; Thornberg, R				Jungert, Tomas; Alm, Fredrik; Thornberg, Robert			Motives for becoming a teacher and their relations to academic engagement and dropout among student teachers	JOURNAL OF EDUCATION FOR TEACHING			English	Article						job motives; student teachers; academic engagement; dropout	PRESERVICE TEACHERS; SCHOOL ENGAGEMENT; CAREER; PERCEPTIONS; MOTIVATIONS; VALIDATION; COMMITMENT	Difficulties in attracting student teachers have resulted in research focusing on student teachers' motives for studying to join the profession. Because previous findings are mixed, the first aim of this study was to explore motives for students to become teachers. A second aim was to explore the relationship between teachers' motives and their academic engagement and dropout rates at the end of …	[Jungert, Tomas; Alm, Fredrik; Thornberg, Robert] Linkoping Univ, Dept Behav Sci & Learning, Linkoping, Sweden	Linkoping University	Jungert, T (corresponding author), Linkoping Univ, Dept Behav Sci & Learning, Linkoping, Sweden.	tomas.jungert@liu.se	Thornberg, Robert/I-8077-2012	Thornberg, Robert/0000-0001-9233-3862					41	54	60	0	38	ROUTLEDGE JOURNALS, TAYLOR & FRANCIS LTD	ABINGDON	2-4 PARK SQUARE, MILTON PARK, ABINGDON OX14 4RN, OXON, ENGLAND	0260-7476	1360-0540		J EDUC TEACHING	J. Educ. Teach.	MAR 15	2014	40	2
J	Özdemir, SB; Stattin, H				Ozdemir, Sevgi Bayram; Stattin, Hakan			Why and When is Ethnic Harassment a Risk for Immigrant Adolescents' School Adjustment? Understanding the Processes and Conditions	JOURNAL OF YOUTH AND ADOLESCENCE			English	Article						Immigrant youth; School adjustment; Ethnic harassment; Ethnic victimization; Depression; Self-esteem	PERCEIVED DISCRIMINATION; RACIAL-DISCRIMINATION; MIDDLE SCHOOL; SELF-ESTEEM; AMERICAN ADOLESCENTS; PEER DISCRIMINATION; ACADEMIC ENGAGEMENT; INTEGRATIVE MODEL; TEACHER SUPPORT; IDENTITY	Ethnically harassed immigrant youth are at risk for experiencing a wide range of school adjustment problems. However, it is still unclear why and under what conditions experiencing ethnic harassment leads to school adjustment difficulties. To address this limitation in the literature, we examined two important questions. First, we investigated whether self-esteem and/or depressive symptoms would …	[Ozdemir, Sevgi Bayram; Stattin, Hakan] Univ Orebro, Res Dev Ctr, Sch Law Psychol & Social Work, SE-70182 Orebro, Sweden	Orebro University	Özdemir, SB (corresponding author), Univ Orebro, Res Dev Ctr, Sch Law Psychol & Social Work, SE-70182 Orebro, Sweden.	sevgi.bayram-ozdemir@oru.se; hakan.stattin@oru.se	Stattin, Håkan/JXM-4008-2024						69	54	64	0	33	SPRINGER/PLENUM PUBLISHERS	NEW YORK	233 SPRING ST, NEW YORK, NY 10013 USA	0047-2891	1573-6601		J YOUTH ADOLESCENCE	J. Youth Adolesc.	AUG	2014	43	8
J	Lozada, FT; Jagers, RJ; Smith, CD; Bañales, J; Hope, EC				Lozada, Fantasy T.; Jagers, Robert J.; Smith, Chauncey D.; Banales, Josefina; Hope, Elan C.			Prosocial Behaviors of Black Adolescent Boys: An Application of a Sociopolitical Development Theory	JOURNAL OF BLACK PSYCHOLOGY			English	Article						Black boys' positive development; oppression analysis; prosocial behavior; sociopolitical development theory	AFRICAN-AMERICAN ADOLESCENTS; RACIAL IDENTITY; ACADEMIC ENGAGEMENT; GENDER-DIFFERENCES; CIVIC ENGAGEMENT; ASIAN-AMERICAN; DISCRIMINATION; SOCIALIZATION; CONTEXT; LATINO	Sociopolitical development theory asserts that critical social analysis informs prosocial behaviors. We suggest that one aspect of Black adolescents' critical social analysis development is an oppression analysis, in which Black adolescents consider (1) the importance of race to they are, (2) their personal feelings about their racial group, and (3) the experience of oppression for minority group…	[Lozada, Fantasy T.; Jagers, Robert J.; Smith, Chauncey D.; Banales, Josefina] Univ Michigan, 530 East Hall, Ann Arbor, MI 48109 USA; [Hope, Elan C.] North Carolina State Univ, Raleigh, NC USA	University of Michigan System; University of Michigan; North Carolina State University	Lozada, FT (corresponding author), Univ Michigan, 530 East Hall, Ann Arbor, MI 48109 USA.	ftlozada@umich.edu			National Science Foundation [BCS0820309]	National Science Foundation(National Science Foundation (NSF))	The authors disclosed receipt of the following financial support for the research, authorship, and/or publication of this article: This research was supported by National Science Foundation Grant BCS0820309.		56	54	68	1	7	SAGE PUBLICATIONS INC	THOUSAND OAKS	2455 TELLER RD, THOUSAND OAKS, CA 91320 USA	0095-7984	1552-4558		J BLACK PSYCHOL	J. Black Psychol.	JUL	2017	43	5
J	Patall, EA; Hooper, S; Vasquez, AC; Pituch, KA; Steingut, RR				Patall, Erika A.; Hooper, Sophia; Vasquez, Ariana C.; Pituch, Keenan A.; Steingut, Rebecca R.			Science class is too hard: Perceived difficulty, disengagement, and the role of teacher autonomy support from a daily diary perspective	LEARNING AND INSTRUCTION			English	Article						Perceived difficulty; Perceived competence; Autonomy support; Disengagement; Daily diary method	SELF-DETERMINATION; STUDENT ENGAGEMENT; ACHIEVEMENT-MOTIVATION; ACADEMIC ENGAGEMENT; SCHOOL; COMPETENCE; GRADES; INTERNALIZATION; EXPERIENCES; MEDIATION	The current research aimed to investigate students' daily experiences in high school classes by answering the following questions: to what extent does daily perceived difficulty of science classwork predict daily feelings of competence and disengagement? Are autonomy-supportive teaching strategies useful when work in science class is perceived to be more difficult than the average day? Two-hundre…	[Patall, Erika A.] Univ Southern Calif, Rossier Sch Rossier Sch Educ, Los Angeles, CA 90089 USA; [Hooper, Sophia; Vasquez, Ariana C.; Pituch, Keenan A.] Univ Texas Austin, Dept Educ Psychol, Austin, TX 78712 USA; [Steingut, Rebecca R.] Columbia Univ, Teachers Coll, New York, NY 10027 USA	University of Southern California; University of Texas System; University of Texas Austin; Columbia University Teachers College; Columbia University	Patall, EA (corresponding author), Univ Southern Calif, Rossier Sch Educ, 3470 Trousdale Pkwy,Waite Phillips Hall, Los Angeles, CA 90089 USA.	patall@rossier.usc.edu	Steingut, Rebecca/P-7119-2017; Patall, Erika/AAM-5679-2020	Yang, Man/0000-0002-9116-7281; Patall, Erika/0000-0003-3448-8932	William T. Grant Foundation [180042]	William T. Grant Foundation	This research was supported by a grant from the William T. Grant Foundation (Project #180042) to Erika A. Patall.		69	54	63	7	56	PERGAMON-ELSEVIER SCIENCE LTD	OXFORD	THE BOULEVARD, LANGFORD LANE, KIDLINGTON, OXFORD OX5 1GB, ENGLAND	0959-4752	1873-3263		LEARN INSTR	Learn Instr.	DEC	2018	58
J	Plunkett, SW; Behnke, AO; Sands, T; Choi, BY				Plunkett, Scott W.; Behnke, Andrew O.; Sands, Tovah; Choi, Brian Y.			Adolescents' Reports of Parental Engagement and Academic Achievement in Immigrant Families	JOURNAL OF YOUTH AND ADOLESCENCE			English	Article						Adolescent academic achievement; Immigrant families; Parent; Monitoring; Schoolwork help; Educational advice	LATINO ADOLESCENTS; ETHNICITY; OUTCOMES; CHILDREN	The purpose of this study was to add to the understanding of the effects of perceived parental engagement on adolescents' academic achievement in immigrant families. Self-report data were collected from 1,245 adolescents in immigrant families from four high schools in Los Angeles County. The sample characteristics follow: 13-16 years old (M = 14.5); 58.9% female, 41.1% male; 57.5% Latino; 40.6% 1…	[Plunkett, Scott W.] Calif State Univ Northridge, Dept Psychol, Northridge, CA 91330 USA; [Behnke, Andrew O.] N Carolina State Univ, Dept Youth Dev & Family & Consumer Sci 4H, Raleigh, NC 27695 USA; [Sands, Tovah] Calif State Univ Northridge, Dept Counseling & Educ Psychol, Northridge, CA 91330 USA; [Choi, Brian Y.] Univ Penn, Grad Sch Educ, Philadelphia, PA 19104 USA	California State University System; California State University Northridge; North Carolina State University; California State University System; California State University Northridge; University of Pennsylvania	Plunkett, SW (corresponding author), Calif State Univ Northridge, Dept Psychol, 18111 Nordhoff St, Northridge, CA 91330 USA.	scott.plunkett@csun.edu; andrew_behnke@ncsu.edu; tovah.sands@csun.edu; brian_y_choi@yahoo.com	Behnke, Andrew/A-8497-2009		NIMH NIH HHS [T34 MH020023] Funding Source: Medline	NIMH NIH HHS(United States Department of Health & Human ServicesNational Institutes of Health (NIH) - USANIH National Institute of Mental Health (NIMH))			42	52	116	2	22	SPRINGER/PLENUM PUBLISHERS	NEW YORK	233 SPRING ST, NEW YORK, NY 10013 USA	0047-2891	1573-6601		J YOUTH ADOLESCENCE	J. Youth Adolesc.	FEB	2009	38	2
J	Kurth, J; Mastergeorge, AM				Kurth, Jennifer; Mastergeorge, Ann M.			Impact of Setting and Instructional Context for Adolescents With Autism	JOURNAL OF SPECIAL EDUCATION			English	Article						autism; inclusion; adolescence; academic	SEVERE DISABILITIES; GENERAL-EDUCATION; ACADEMIC ENGAGEMENT; STUDENTS; CHILDREN; PERSPECTIVES; STRATEGIES; BEHAVIOR; ABILITY; AGE	The present study describes the instructional contexts and activities of adolescents with autism in inclusive and self-contained settings for mathematics and language arts instruction using a descriptive statistics design. In the study, 15 adolescents with autism, and 30 peers of these students, participated. All students were observed over the school year in 50-min intervals each during math and…	[Kurth, Jennifer] No Arizona Univ, Flagstaff, AZ 86011 USA; [Mastergeorge, Ann M.] Univ Calif Davis, Davis, CA 95616 USA	Northern Arizona University; University of California System; University of California Davis	Kurth, J (corresponding author), No Arizona Univ, Box 5774, Flagstaff, AZ 86011 USA.	Jennifer.Kurth@nau.edu							41	52	87	1	17	SAGE PUBLICATIONS INC	THOUSAND OAKS	2455 TELLER RD, THOUSAND OAKS, CA 91320 USA	0022-4669	1538-4764		J SPEC EDUC	J. Spec. Educ.	MAY	2012	46	1
J	Ouweneel, E; Le Blanc, PM; Schaufeli, WB				Ouweneel, Else; Le Blanc, Pascale M.; Schaufeli, Wilmar B.			On Being Grateful and Kind: Results of Two Randomized Controlled Trials on Study-Related Emotions and Academic Engagement	JOURNAL OF PSYCHOLOGY			English	Article						academic engagement; acts of kindness; emotions; thoughts of gratitude; positive psychology	WITHIN-DOMAIN RELATIONS; COUNTING BLESSINGS; POSITIVE EMOTIONS; BETWEEN-DOMAIN; HAPPINESS; STUDENTS; MOTIVATION; GRATITUDE; BURNOUT; INTERVENTIONS	Despite the large amount of research attention to engagement as well as positive psychology in a general context, there have been few attempts to increase academic well-being by means of positive psychological interventions. This article tests the potential of positive psychological interventions to enhance study-related positive emotions and academic engagement, and to reduce study-related negat…	[Ouweneel, Else; Schaufeli, Wilmar B.] Univ Utrecht, Dept Work & Org Psychol, NL-3584 ZP Utrecht, Netherlands; [Le Blanc, Pascale M.] Eindhoven Univ Technol, Human Performance Management Grp, NL-5600 MB Eindhoven, Netherlands	Utrecht University; Eindhoven University of Technology	Schaufeli, WB (corresponding author), Univ Utrecht, Dept Psychol, POB 80-140, NL-3584 ZP Utrecht, Netherlands.	w.schaufeli@uu.nl	Schaufeli, Wilmar/B-9645-2013	Schaufeli, Wilmar/0000-0002-6070-7150					39	52	71	5	71	ROUTLEDGE JOURNALS, TAYLOR & FRANCIS LTD	ABINGDON	2-4 PARK SQUARE, MILTON PARK, ABINGDON OX14 4RN, OXON, ENGLAND	0022-3980	1940-1019		J PSYCHOL	J. Psychol.	JAN 1	2014	148	1
J	Upton, S; Vallance, P; Goddard, J				Upton, Stevie; Vallance, Paul; Goddard, John			From outcomes to process: evidence for a new approach to research impact assessment	RESEARCH EVALUATION			English	Article						universities; research impact; knowledge exchange; evaluation; outcomes; process	RESEARCH EXCELLENCE FRAMEWORK; PRODUCTIVE INTERACTIONS; HIGHER-EDUCATION; UNIVERSITIES; INSTITUTIONS; ENGAGEMENT; POLICY; UK	This article reports evidence from two studies conducted in nine British universities into individual academic and institutional perspectives on research impact. We analyse our findings in the context of global developments in performance measurement. Mechanisms for assessing the quality of research and associated knowledge exchange serve a dual purpose: used retrospectively, they enable public f…	[Upton, Stevie] Univ Georgia, Inst Higher Educ, Athens, GA 30602 USA; [Vallance, Paul; Goddard, John] Newcastle Univ, Ctr Urban & Reg Dev Studies, Newcastle Upon Tyne NE1 7RU, Tyne & Wear, England	University System of Georgia; University of Georgia; Newcastle University - UK	Upton, S (corresponding author), Univ Georgia, Inst Higher Educ, Athens, GA 30602 USA.	stevie@uga.edu		Vallance, Paul/0000-0002-0024-7105; Goddard, John/0000-0001-8262-5394					62	52	56	1	62	OXFORD UNIV PRESS	OXFORD	GREAT CLARENDON ST, OXFORD OX2 6DP, ENGLAND	0958-2029	1471-5449		RES EVALUAT	Res. Evaluat.	OCT	2014	23	4
J	Quinlan, DM; Swain, N; Cameron, C; Vella-Brodrick, DA				Quinlan, Denise M.; Swain, Nicola; Cameron, Claire; Vella-Brodrick, Dianne A.			How 'other people matter' in a classroom-based strengths intervention: Exploring interpersonal strategies and classroom outcomes	JOURNAL OF POSITIVE PSYCHOLOGY			English	Article						children; positive affect; engagement; character strengths	POSITIVE PSYCHOLOGY; SELF-DETERMINATION; LIFE SATISFACTION; NEGATIVE AFFECT; VALIDATION; ENGAGEMENT; PROGRESS; DISAFFECTION; COMPETENCE; CLIMATE	Interventions that identify and develop character strengths have been shown to benefit well-being, academic engagement and achievement. Strengths research within positive psychology has focused primarily on individual outcomes with less attention on group or relationships effects. This study (N = 193) examined the effect of a classroom-based strengths intervention on class cohesion and friction, …	[Quinlan, Denise M.] Univ Otago, Coll Educ, Educ Assessment Res Unit, Dunedin, New Zealand; [Swain, Nicola] Univ Otago, Dunedin Sch Med, Dept Psychol Med, Dunedin, New Zealand; [Cameron, Claire] Univ Otago, Dunedin Sch Med, Dept Prevent & Social Med, Dunedin, New Zealand; [Vella-Brodrick, Dianne A.] Univ Melbourne, Grad Sch Educ, Melbourne, Vic, Australia	University of Otago; University of Otago; University of Otago; University of Melbourne	Quinlan, DM (corresponding author), Univ Otago, Coll Educ, Educ Assessment Res Unit, Dunedin, New Zealand.	denise.quinlan@otago.ac.nz		Vella-Brodrick, Dianne/0000-0002-4534-1998; , Nicola/0000-0002-2467-5796; Cameron, Claire/0000-0002-2151-4137					60	52	60	2	52	ROUTLEDGE JOURNALS, TAYLOR & FRANCIS LTD	ABINGDON	2-4 PARK SQUARE, MILTON PARK, ABINGDON OX14 4RN, OXON, ENGLAND	1743-9760	1743-9779		J POSIT PSYCHOL	J. Posit. Psychol.	JAN 2	2015	10	1
J	Leflot, G; Onghena, P; Colpin, H				Leflot, Geertje; Onghena, Patrick; Colpin, Hilde			Teacher-Child Interactions: Relations with Children's Self-Concept in Second Grade	INFANT AND CHILD DEVELOPMENT			English	Article						teacher-child interactions; self-concept; childhood	SOCIOEMOTIONAL COMPETENCE; DISRUPTIVE BEHAVIOR; ACADEMIC ENGAGEMENT; GENDER-DIFFERENCES; PERCEIVED CONTROL; YOUNG-CHILDREN; SCHOOL; CLASSROOM; KINDERGARTEN; ACHIEVEMENT	This study examined whether teacher child interactions characterized by teacher involvement, structure, and autonomy support at the beginning of second grade predicted children's global, academic, social, and behavioural self-concept at the end of second grade. The study was conducted in 30 second grade classrooms with 570 children and their teachers. Data included teacher reports of teacher-chil…	[Leflot, Geertje; Onghena, Patrick; Colpin, Hilde] Univ Leuven KU Leuven, Fac Psychol & Educ Sci, Louvain, Belgium	KU Leuven	Leflot, G (corresponding author), Sch Psychol & Child & Addescent Dev, Tiensestr 102,Box 3717, B-3000 Louvain, Belgium.	geertje.leflot@psy.kuleuven.be	Onghena, Patrick/M-6649-2017	Onghena, Patrick/0000-0002-3986-8312					101	51	76	3	60	WILEY	HOBOKEN	111 RIVER ST, HOBOKEN 07030-5774, NJ USA	1522-7227	1522-7219		INFANT CHILD DEV	Infant Child Dev.	JUL-AUG	2010	19	4
J	Luthar, SS; Ansary, NS				Luthar, SS; Ansary, NS			Dimensions of adolescent rebellion: Risks for academic failure among high- and low-income youth	DEVELOPMENT AND PSYCHOPATHOLOGY			English	Article							SUBSTANCE USE; DEVELOPMENTAL PSYCHOPATHOLOGY; CIGARETTE-SMOKING; SCHOOL FAILURE; DRUG-USE; ACHIEVEMENT; BEHAVIOR; ASSOCIATIONS; DELINQUENCY; COMPETENCE	The central question addressed in this Study was whether upper class, suburban teenagers can engage in various problem behaviors and still maintain adequate academic grades, because of environmental safety nets, unlike their low-income, inner-city counterparts. Three problem behavior dimensions were assessed among tenth graders, that is, substance use, delinquency, and low school engagement. Acad…	Columbia Univ Teachers Coll, Dept Counseling & Clin Psychol, New York, NY 10027 USA	Columbia University Teachers College	Columbia Univ Teachers Coll, Dept Counseling & Clin Psychol, Box 133,525 W 120th St, New York, NY 10027 USA.	suniya.luthar@columbia.edu			NIDA NIH HHS [R01 DA010726, R01 DA014385, R01-DA10726, R01-DA11498, R01-DA14385] Funding Source: Medline	NIDA NIH HHS(United States Department of Health & Human ServicesNational Institutes of Health (NIH) - USANIH National Institute on Drug Abuse (NIDA))			94	50	68	1	25	CAMBRIDGE UNIV PRESS	NEW YORK	32 AVENUE OF THE AMERICAS, NEW YORK, NY 10013-2473 USA	0954-5794	1469-2198		DEV PSYCHOPATHOL	Dev. Psychopathol.	WIN	2005	17	1
J	Haydon, T; Hawkins, R; Denune, H; Kimener, L; McCoy, D; Basham, J				Haydon, Todd; Hawkins, Renee; Denune, Hillary; Kimener, Lauren; McCoy, Dacia; Basham, James			A Comparison of iPads and Worksheets on Math Skills of High School Students with Emotional Disturbance	BEHAVIORAL DISORDERS			English	Article							SELF-CONTAINED CLASSROOMS; BEHAVIORAL-DISORDERS; RISK; INTERVENTIONS; OPPORTUNITIES; ENGAGEMENT; RESPOND; TIME	The authors used an alternating treatments design to compare the effects of a worksheet condition and an iPad condition on math fluency and active academic engagement during a high school math class in an alternative school setting. Following group instruction, the three participants engaged in independent seatwork either by completing problems on a worksheet or completing problems presented on a…	[Haydon, Todd] Univ Cincinnati, Teachers Coll 600F, Cincinnati, OH 45221 USA; [Basham, James] Univ Kansas, Lawrence, KS 66045 USA	University System of Ohio; University of Cincinnati; University of Kansas	Haydon, T (corresponding author), Univ Cincinnati, Teachers Coll 600F, Cincinnati, OH 45221 USA.	todd.haydon@uc.edu							33	50	112	0	25	SAGE PUBLICATIONS INC	THOUSAND OAKS	2455 TELLER RD, THOUSAND OAKS, CA 91320 USA	0198-7429	2163-5307		BEHAV DISORDERS	Behav. Disord.	AUG	2012	37	4
J	Chafouleas, SM; Kilgus, SP; Jaffery, R; Riley-Tillman, TC; Welsh, M; Christ, TJ				Chafouleas, Sandra M.; Kilgus, Stephen P.; Jaffery, Rose; Riley-Tillman, T. Chris; Welsh, Megan; Christ, Theodore J.			Direct behavior rating as a school-based behavior screener for elementary and middle grades	JOURNAL OF SCHOOL PSYCHOLOGY			English	Article						Behavior assessment; Conditional probability indices; Behavior expectations; Direct behavior rating	SYSTEMATIC DIRECT OBSERVATION; TEACHER EXPECTATIONS; SCORE RELIABILITY; SOCIAL-SKILLS; PREDICTIVE-VALIDITY; ACADEMIC ENGAGEMENT; RISK; GENERALIZABILITY; STUDENTS; SCALE	The purpose of this study was to investigate how Direct Behavior Rating Single Item Scales (DBR-SIS) involving targets of academically engaged, disruptive, and respectful behaviors function in school-based screening assessment. Participants included 831 students in kindergarten through eighth grades who attended schools in the northeastern United States. Teachers provided behavior ratings for a s…	[Chafouleas, Sandra M.; Jaffery, Rose; Welsh, Megan] Univ Connecticut, Storrs, CT 06269 USA; [Kilgus, Stephen P.] E Carolina Univ, Greenville, NC 27858 USA; [Riley-Tillman, T. Chris] Univ Missouri, Columbia, MO 65211 USA; [Christ, Theodore J.] Univ Minnesota, Minneapolis, MN 55455 USA	University of Connecticut; University of North Carolina; East Carolina University; University of Missouri System; University of Missouri Columbia; University of Minnesota System; University of Minnesota Twin Cities	Chafouleas, SM (corresponding author), Univ Connecticut, Dept Educ Psychol, U-2064, Storrs, CT 06269 USA.	sandra.chafouleas@uconn.edu		Kilgus, Stephen/0000-0003-0218-1004; Riley-Tillman, Timothy/0000-0001-7057-0429; Christ, Theodore/0000-0002-5397-0364					81	50	67	0	14	PERGAMON-ELSEVIER SCIENCE LTD	OXFORD	THE BOULEVARD, LANGFORD LANE, KIDLINGTON, OXFORD OX5 1GB, ENGLAND	0022-4405	1873-3506		J SCHOOL PSYCHOL	J. Sch. Psychol.	JUN	2013	51	3
J	Merriman, P				Merriman, Peter			Mobilities I: Departures	PROGRESS IN HUMAN GEOGRAPHY			English	Article						creativity; exclusion; mobility; politics; underground	GEOGRAPHIES; POLITICS; ART	This first report identifies key trends in mobilities research during late 2012 and 2013. Using the 150th anniversary of the London Underground as its launching point, the article explores a number of academic engagements with its history, as well as identifying the lack of research on underground or underwater mobilities. It then examines recent work which might be considered to provide creative…	[Merriman, Peter] Aberystwyth Univ, Aberystwyth SY23 3DB, Dyfed, Wales	Aberystwyth University	Merriman, P (corresponding author), Aberystwyth Univ, Dept Geog & Earth Sci, Aberystwyth SY23 3DB, Dyfed, Wales.	prm@aber.ac.uk	Merriman, Peter/H-1633-2012	Merriman, Peter/0000-0001-8118-6684					69	50	53	1	21	SAGE PUBLICATIONS LTD	LONDON	1 OLIVERS YARD, 55 CITY ROAD, LONDON EC1Y 1SP, ENGLAND	0309-1325	1477-0288		PROG HUM GEOG	Prog. Hum. Geogr.	FEB	2015	39	1
J	Carter, EW; Sisco, LG; Melekoglu, MA; Kurkowski, C				Carter, Erik W.; Sisco, Lynn G.; Melekoglu, Macid A.; Kurkowski, Colleen			Peer supports as an alternative to individually assigned paraprofessionals in inclusive high school classrooms	RESEARCH AND PRACTICE FOR PERSONS WITH SEVERE DISABILITIES			English	Article						inclusion; general curriculum; social interaction; academic engagement; transition; peer supports	SIGNIFICANT COGNITIVE DISABILITIES; GENERAL-EDUCATION CLASSROOMS; INTELLECTUAL DISABILITIES; SOCIAL INTERACTIONS; MENTAL-RETARDATION; PROMOTING ACCESS; STUDENTS; CURRICULUM; INTERVENTION; STRATEGIES	Promoting access to the general curriculum has emerged as a central theme of the standards-based reform movement, challenging educators to identify-effective strategies for supporting students with disabilities to access the numerous social and learning opportunities within general education. We examined peer support interventions as an alternative to one-to-one, adult-delivered support in high s…	[Carter, Erik W.; Sisco, Lynn G.; Melekoglu, Macid A.; Kurkowski, Colleen] Univ Wisconsin, Dept Rehabil Psychol & Special Educ, Madison, WI 53706 USA	University of Wisconsin System; University of Wisconsin Madison	Carter, EW (corresponding author), Univ Wisconsin, Dept Rehabil Psychol & Special Educ, 432 E Campus Mall, Madison, WI 53706 USA.	ewcarter@wisc.edu	Carter, Erik/AAX-3043-2020; Melekoglu, Macid/AAK-1798-2020	Carter, Erik/0000-0001-7153-2782; Melekoglu, Macid/0000-0002-9933-5331					52	49	98	3	31	TASH	BALTIMORE	29 W SUSQUEHANNA AVE, STE 210, BALTIMORE, MD 21204-5201 USA	0274-9483			RES PRACT PERS SEV D	Res. Pract. Pers. Sev. Disabil.	WIN	2007	32	4
J	Atkins, MS; Shernoff, ES; Frazier, SL; Schoenwald, SK; Cappella, E; Marinez-Lora, A; Mehta, TG; Lakind, D; Cua, G; Bhaumik, R; Bhaumik, D				Atkins, Marc S.; Shernoff, Elisa S.; Frazier, Stacy L.; Schoenwald, Sonja K.; Cappella, Elise; Marinez-Lora, Ane; Mehta, Tara G.; Lakind, Davielle; Cua, Grace; Bhaumik, Runa; Bhaumik, Dulal			Redesigning Community Mental Health Services for Urban Children: Supporting Schooling to Promote Mental Health	JOURNAL OF CONSULTING AND CLINICAL PSYCHOLOGY			English	Article						school-based mental health; disruptive behavior disorder; urban communities; key opinion leaders; public health	GOOD BEHAVIOR GAME; DISRUPTIVE BEHAVIOR; LOW-INCOME; FAMILY SUPPORT; TEACHER; PROGRAMS; YOUTH; PSYCHOPATHOLOGY; OPPORTUNITIES; INTERVENTION	Objective: This study examined a school- and home-based mental health service model, Links to Learning, focused on empirical predictors of learning as primary goals for services in high-poverty urban communities. Method: Teacher key opinion leaders were identified through sociometric surveys and trained, with mental health providers and parent advocates, on evidence-based practices to enhance chi…	[Atkins, Marc S.; Shernoff, Elisa S.; Frazier, Stacy L.; Marinez-Lora, Ane; Mehta, Tara G.; Lakind, Davielle; Cua, Grace; Bhaumik, Runa; Bhaumik, Dulal] Univ Illinois, Dept Psychiat, Chicago, IL USA; [Schoenwald, Sonja K.] Med Univ S Carolina, Dept Psychiat, Charleston, SC USA; [Cappella, Elise] NYU, Dept Appl Psychol, New York, NY 10003 USA	University of Illinois System; University of Illinois Chicago; University of Illinois Chicago Hospital; Medical University of South Carolina; New York University	Atkins, MS (corresponding author), Inst Juvenile Res, 1747 West Roosevelt Rd,Room 155, Chicago, IL 60608 USA.	atkins@uic.edu	Lakind, Davielle/Y-9258-2019; Shernoff, Elisa/H-3235-2018	Frazier, Stacy/0000-0003-0335-5678; Shernoff, Elisa/0000-0002-7649-118X; Marinez-Lora, Ane/0000-0002-8774-6774	National Institute of Mental Health [R21MH067361, R01MH073749, P20MH078458]	National Institute of Mental Health(United States Department of Health & Human ServicesNational Institutes of Health (NIH) - USANIH National Institute of Mental Health (NIMH))	This research was conducted with support from National Institute of Mental Health Grants R21MH067361, R01MH073749, and P20MH078458 (Marc S. Atkins, PI).		75	49	66	6	57	AMER PSYCHOLOGICAL ASSOC	WASHINGTON	750 FIRST ST NE, WASHINGTON, DC 20002-4242 USA	0022-006X	1939-2117		J CONSULT CLIN PSYCH	J. Consult. Clin. Psychol.	OCT	2015	83	5
J	Carter, EW; Gustafson, JR; Sreckovic, MA; Steinbrenner, JRD; Pierce, NP; Bord, A; Stabel, A; Rogers, S; Czerw, A; Mullins, T				Carter, Erik W.; Gustafson, Jenny R.; Sreckovic, Melissa A.; Steinbrenner, Jessica R. Dykstra; Pierce, Nigel P.; Bord, Aimee; Stabel, Aaron; Rogers, Sally; Czerw, Alicia; Mullins, Teagan			Efficacy of Peer Support Interventions in General Education Classrooms for High School Students With Autism Spectrum Disorder	REMEDIAL AND SPECIAL EDUCATION			English	Article						peer-mediated; adolescents; inclusion; general education access	SOCIAL CONNECTIONS; ADOLESCENTS; ARRANGEMENTS; INCLUSION; YOUTH; PARAPROFESSIONALS; DISABILITIES; COMPETENCE; CURRICULUM; NETWORKS	Even with inclusive general education classrooms, high school students with autism spectrum disorder (ASD) often have few social interactions with classmates. Peer support arrangements hold promise for increasing peer interactions and shared learning within general education classrooms. However, previous evaluations of this intervention have focused narrowly on adolescents with severe intellectua…	[Carter, Erik W.; Gustafson, Jenny R.; Czerw, Alicia; Mullins, Teagan] Vanderbilt Univ, 221 Kirkland Hall, Nashville, TN 37235 USA; [Sreckovic, Melissa A.; Steinbrenner, Jessica R. Dykstra] Univ North Carolina Chapel Hill, Chapel Hill, NC USA; [Pierce, Nigel P.] North Carolina Cent Univ, Durham, NC USA; [Bord, Aimee; Stabel, Aaron; Rogers, Sally] Univ Calif Davis, Davis, CA 95616 USA	Vanderbilt University; University of North Carolina; University of North Carolina Chapel Hill; University of North Carolina School of Medicine; University of North Carolina; North Carolina Central University; University of California System; University of California Davis	Carter, EW (corresponding author), Vanderbilt Univ, Dept Special Educ, Peabody Coll, PMB 228, Nashville, TN 37203 USA.	erik.carter@vanderbilt.edu	Carter, Erik/AAX-3043-2020	Carter, Erik/0000-0001-7153-2782; Rogers, Sally/0000-0003-0755-2900	Institute of Education Sciences, U.S. Department of Education [R324C120006]	Institute of Education Sciences, U.S. Department of Education(US Department of Education)	The author(s) disclosed receipt of the following financial support for the research, authorship, and/or publication of this article: Support for this research came from the Institute of Education Sciences, U.S. Department of Education, Grant R324C120006 awarded to the University of North Carolina at Chapel Hill.		34	49	60	4	45	SAGE PUBLICATIONS INC	THOUSAND OAKS	2455 TELLER RD, THOUSAND OAKS, CA 91320 USA	0741-9325	1538-4756		REM SPEC EDUC	Remedial Spec. Educ.	JUL-AUG	2017	38	4
J	Truta, C; Parv, L; Topala, I				Truta, Camelia; Parv, Luminita; Topala, Ioana			Academic Engagement and Intention to Drop Out: Levers for Sustainability in Higher Education	SUSTAINABILITY			English	Article						academic dropout; academic engagement; sustainable education; students at risk; students' satisfaction; academic context	UNIVERSITIES; INVOLVEMENT; SCHOOL; STAFF	The present paper analyses the relevance of academic engagement in the process of students dropping out of school. Previous studies have consistently shown strong associations between engagement and students' achievement outcomes. The increased attention given to academic engagement in recent years is also visible in the efforts of stakeholders in higher education to increase engagement and, cons…	[Truta, Camelia; Topala, Ioana] Transilvania Univ Brasov, Dept Psychol Educ & Teaching Training, 29 Eroilor Blvd, Brasov 500036, Romania; [Parv, Luminita] Transilvania Univ Brasov, Dept Mfg Engn, 29 Eroilor Blvd, Brasov 500036, Romania	Transylvania University of Brasov; Transylvania University of Brasov	Parv, L (corresponding author), Transilvania Univ Brasov, Dept Mfg Engn, 29 Eroilor Blvd, Brasov 500036, Romania.	camitruta@unitbv.ro; luminita.parv@unitbv.ro; ioana.stroe@unitbv.ro	Parv, Luminita/AAX-1242-2020; Truta, Camelia/AAC-8333-2022; Parv, Luminita/G-7203-2019	Truta, Camelia/0000-0002-7189-2507; Parv, Luminita/0000-0001-6127-1339	Institutional Development Fund [CNFIS-FDI-2018-0503]	Institutional Development Fund	This work was partially supported by the Institutional Development Fund (grant CNFIS-FDI-2018-0503).		41	49	62	9	48	MDPI	BASEL	ST ALBAN-ANLAGE 66, CH-4052 BASEL, SWITZERLAND		2071-1050		SUSTAINABILITY-BASEL	Sustainability	DEC	2018	10	12
J	Vizoso, C; Rodríguez, C; Arias-Gundín, O				Vizoso, Carmen; Rodriguez, Celestino; Arias-Gundin, Olga			Coping, academic engagement and performance in university students	HIGHER EDUCATION RESEARCH & DEVELOPMENT			English	Article						Academic engagement; coping strategies; performance; university students	PERCEIVED EMOTIONAL INTELLIGENCE; DEMANDS-RESOURCES MODEL; MEDIATING ROLE; CAREER CONSTRUCTION; STRATEGIES; BURNOUT; STRESS; MOTIVATION; ADAPTATION; EXTENSION	The aim of this study is to evaluate the relationships between coping (i.e., adaptive or maladaptive), academic engagement dimensions (i.e., vigor, dedication and absorption) and academic performance, as well as the mediating role of academic engagement dimensions in the relationship between coping and academic performance. Data were collected from a sample of 808 undergraduate students at a Span…	[Vizoso, Carmen; Arias-Gundin, Olga] Leon Univ, Dept Psychol Sociol & Philosophy, Leon, Spain; [Rodriguez, Celestino] Oviedo Univ, Dept Psychol, Oviedo, Spain		Vizoso, C (corresponding author), Leon Univ, Dept Psychol Sociol & Philosophy, Leon, Spain.	cvizg@unileon.es	RodrÃguez, Celestino/B-5989-2018; Arias-Gundin, Olga/AAO-6990-2020; Gómez, Carmen Vizoso/N-5414-2018	RodrÃguez, Celestino/0000-0003-4137-4503; Arias-Gundin, Olga/0000-0002-7371-355X; Gómez, Carmen Vizoso/0000-0003-2549-8506					58	49	52	6	140	ROUTLEDGE JOURNALS, TAYLOR & FRANCIS LTD	ABINGDON	2-4 PARK SQUARE, MILTON PARK, ABINGDON OX14 4RN, OXON, ENGLAND	0729-4360	1469-8366		HIGH EDUC RES DEV	High. Educ. Res. Dev.	NOV 10	2018	37	7
J	Johnson, SR; Stage, FK				Johnson, Sarah Randall; Stage, Frances King			Academic Engagement and Student Success: Do High-Impact Practices Mean Higher Graduation Rates?	JOURNAL OF HIGHER EDUCATION			English	Article						Academic engagement; college completion; high-impact practices	ACHIEVEMENT; EDUCATION; DROPOUTS; BENEFITS	This study examined the relationship between 10 high-impact practices and graduation rates at four-year public colleges and universities in the United States. The Association of American Colleges and Universities defined high-impact practices as especially effective for student learning, engagement, and career preparation in the 21st century. While advocacy for these practices and their inclusion…	[Johnson, Sarah Randall] Harvard Sch Business, Inst Res, Boston, MA 02163 USA; [Stage, Frances King] NYU, Higher & Postsecondary Educ, New York, NY USA	Harvard University; New York University	Johnson, SR (corresponding author), Harvard Sch Business, Inst Res, Boston, MA 02163 USA.	srjohnson@hbs.edu							70	49	144	6	53	ROUTLEDGE JOURNALS, TAYLOR & FRANCIS LTD	ABINGDON	2-4 PARK SQUARE, MILTON PARK, ABINGDON OX14 4RN, OXON, ENGLAND	0022-1546	1538-4640		J HIGH EDUC-UK	J. High. Educ.		2018	89	5
J	Wallace, T; Anderson, AR; Bartholomay, T; Hupp, S				Wallace, T; Anderson, AR; Bartholomay, T; Hupp, S			An ecobehavioral examination of high school classrooms that include students with disabilities	EXCEPTIONAL CHILDREN			English	Article							GENERAL-EDUCATION CLASSROOMS; LONGITUDINAL ANALYSIS; ENGAGED BEHAVIOR; TIME; ACHIEVEMENT; PROGRAMS; RESOURCE; CONTEXT	This study examined teacher behaviors, student responses, and classroom ecology in inclusive classrooms in four high schools that have had success at including students with disabilities in general education, and examined the differences in teacher and student behavior for students with and without disabilities. Using a computerized ecobehavioral assessment tool (EBASS), 199 observations in 118 i…	Univ Minnesota, Coll Educ & Human Dev, Inst Community Integrat, Minneapolis, MN 55455 USA	University of Minnesota System; University of Minnesota Twin Cities	Wallace, T (corresponding author), Univ Minnesota, Coll Educ & Human Dev, Inst Community Integrat, Room 111A,150 Pillsbury Dr SE, Minneapolis, MN 55455 USA.								36	48	73	0	9	COUNCIL EXCEPTIONAL CHILDREN	RESTON	1920 ASSOCIATION DR, RESTON, VA 22091-1589 USA	0014-4029			EXCEPT CHILDREN	Except. Child.	SPR	2002	68	3
J	Font, S; Maguire-Jack, K				Font, Sarah; Maguire-Jack, Kathryn			Academic engagement and performance: Estimating the impact of out-of-home care for maltreated children	CHILDREN AND YOUTH SERVICES REVIEW			English	Article						Foster care; Education; Maltreatment; Out of home care; Achievement; Engagement	SCHOOL PERFORMANCE; DISCIPLINARY PROBLEMS; ACHIEVEMENT; PLACEMENT	Using data from the National Survey of Child and Adolescent Well-being II, the authors examined whether being placed in foster care was associated with school engagement and performance. The authors used propensity score matching to compare children who had similar demographic characteristics, maltreatment histories, and prior levels of school engagement. Children who were in foster care at wave …	[Font, Sarah; Maguire-Jack, Kathryn] Univ Wisconsin, Sch Social Work, Madison, WI 53706 USA	University of Wisconsin System; University of Wisconsin Madison	Font, S (corresponding author), Univ Wisconsin, Sch Social Work, 1350 Univ Ave, Madison, WI 53706 USA.	font@wisc.edu; kmaguire@wisc.edu	Maguire-Jack, Kathryn Louise/L-8820-2013						38	48	62	0	19	PERGAMON-ELSEVIER SCIENCE LTD	OXFORD	THE BOULEVARD, LANGFORD LANE, KIDLINGTON, OXFORD OX5 1GB, ENGLAND	0190-7409	1873-7765		CHILD YOUTH SERV REV	Child. Youth Serv. Rev.	MAY	2013	35	5
J	Lucio, R; Hunt, E; Bornovalova, M				Lucio, Robert; Hunt, Elizabeth; Bornovalova, Marina			Identifying the Necessary and Sufficient Number of Risk Factors for Predicting Academic Failure	DEVELOPMENTAL PSYCHOLOGY			English	Article						academic achievement; ROC curve; risk of academic failure; school related risk factors; adolescence	COMPETENCE	Identifying the point at which individuals become at risk for academic failure (grade point average [GPA] < 2.0) involves an understanding of which and how many factors contribute to poor outcomes. School-related factors appear to be among the many factors that significantly impact academic success or failure. This study focused on 12 school-related factors. Using a thorough 5-step process, we id…	[Lucio, Robert] Univ S Florida, Louis de la Parte Florida Mental Hlth Inst, Coll Behav & Community Sci, Dept Child & Family Studies, Tampa, FL 33612 USA; [Lucio, Robert] Univ S Florida, Harrell Ctr, Dept Community & Family Hlth, Coll Publ Hlth, Tampa, FL 33612 USA; [Hunt, Elizabeth; Bornovalova, Marina] Univ S Florida, Dept Psychol, Tampa, FL 33612 USA	State University System of Florida; University of South Florida; State University System of Florida; University of South Florida; State University System of Florida; University of South Florida	Lucio, R (corresponding author), Univ S Florida, Louis de la Parte Florida Mental Hlth Inst, Coll Behav & Community Sci, Dept Child & Family Studies, 13301 Bruce B Downs Blvd,MHC 2205, Tampa, FL 33612 USA.	rlucio@usf.edu	Bornovalova, Marina/J-9711-2019	Bornovalova, Marina/0000-0002-2140-2493					20	47	93	3	38	AMER PSYCHOLOGICAL ASSOC	WASHINGTON	750 FIRST ST NE, WASHINGTON, DC 20002-4242 USA	0012-1649	1939-0599		DEV PSYCHOL	Dev. Psychol.	MAR	2012	48	2
J	Stone, J; Harrison, CK; Mottley, J				Stone, Jeff; Harrison, C. Keith; Mottley, JaVonte			Don't Call Me a Student-Athlete: The Effect of Identity Priming on Stereotype Threat for Academically Engaged African American College Athletes	BASIC AND APPLIED SOCIAL PSYCHOLOGY			English	Article							WOMENS MATH PERFORMANCE; INTELLECTUAL-PERFORMANCE; SALIENCE; SPORTS	Academically engaged African American college athletes are most susceptible to stereotype threat in the classroom when the context links their unique status as both scholar and athlete. After completing a measure of academic engagement, African American and White college athletes completed a test of verbal reasoning. To vary stereotype threat, they first indicated their status as a scholar-athlet…	[Stone, Jeff] Univ Arizona, Dept Psychol, Tucson, AZ 85721 USA; [Harrison, C. Keith; Mottley, JaVonte] Univ Cent Florida, Orlando, FL 32816 USA	University of Arizona; State University System of Florida; University of Central Florida	Stone, J (corresponding author), Univ Arizona, Dept Psychol, 1503 E Univ Blvd, Tucson, AZ 85721 USA.	jeffs@email.arizona.edu							32	47	118	0	42	PSYCHOLOGY PRESS	HOVE	27 CHURCH RD, HOVE BN3 2FA, EAST SUSSEX, ENGLAND	0197-3533			BASIC APPL SOC PSYCH	Basic Appl Soc. Psychol.		2012	34	2
J	Yorke, M				Yorke, Mantz			The development and initial use of a survey of student 'belongingness', engagement and self-confidence in UK higher education	ASSESSMENT & EVALUATION IN HIGHER EDUCATION			English	Article						belonging; engagement; self-confidence; survey		Students' sense of belongingness' and their engagement in academic study have been identified as key contributors to student success. A short instrument that can identify changes over time in students' sense of belonging to their institution, their academic engagement and their self-confidence has been developed and used in conjunction with the What Works? Student Retention and Success Change Pro…	[Yorke, Mantz] Univ Lancaster, Dept Educ Res, Lancaster, England	Lancaster University	Yorke, M (corresponding author), Univ Lancaster, Dept Educ Res, Lancaster, England.	mantzyorke@mantzyorke.plus.com			Paul Hamlyn Foundation; Higher Education Academy	Paul Hamlyn Foundation; Higher Education Academy	The work reported in this article has been supported by the Paul Hamlyn Foundation and the Higher Education Academy. Thanks are due to colleagues and students for their contribution to the pilot studies. Thanks are also due to the staff in the universities participating in the 'What Works? Student Retention and Success Change Programme', who have encouraged their students to respond to the survey…		11	47	73	2	29	ROUTLEDGE JOURNALS, TAYLOR & FRANCIS LTD	ABINGDON	2-4 PARK SQUARE, MILTON PARK, ABINGDON OX14 4RN, OXON, ENGLAND	0260-2938	1469-297X		ASSESS EVAL HIGH EDU	Assess. Eval. High. Educ.	JAN 2	2016	41	1
[truncated: 1,368 more rows]
[truncated: 22 more columns]

## Sheet: dynamic
	Count of UT (Unique WOS ID)
FRONTIERS IN PSYCHOLOGY	70
JOURNAL OF SCHOOL PSYCHOLOGY	37
JOURNAL OF YOUTH AND ADOLESCENCE	31
PSYCHOLOGY IN THE SCHOOLS	30
CURRENT PSYCHOLOGY	30
JOURNAL OF POSITIVE BEHAVIOR INTERVENTIONS	29
EDUCATIONAL PSYCHOLOGY	23
LEARNING AND INDIVIDUAL DIFFERENCES	22
BEHAVIORAL DISORDERS	22
STUDIES IN HIGHER EDUCATION	21
SOCIAL PSYCHOLOGY OF EDUCATION	20
CHILDREN AND YOUTH SERVICES REVIEW	19
SCHOOL PSYCHOLOGY REVIEW	16
JOURNAL OF EDUCATIONAL PSYCHOLOGY	15
SUSTAINABILITY	15
JOURNAL OF APPLIED DEVELOPMENTAL PSYCHOLOGY	15
EDUCATION AND INFORMATION TECHNOLOGIES	15
CONTEMPORARY EDUCATIONAL PSYCHOLOGY	14
DEVELOPMENTAL PSYCHOLOGY	14
JOURNAL OF TECHNOLOGY TRANSFER	13
REVISTA DE PSICODIDACTICA	12
PLOS ONE	12
INTERNATIONAL JOURNAL OF ENVIRONMENTAL RESEARCH AND PUBLIC HEALTH	12
JOURNAL OF ADOLESCENCE	12
SCHOOL PSYCHOLOGY INTERNATIONAL	11
CHILD DEVELOPMENT	11
BRITISH JOURNAL OF EDUCATIONAL PSYCHOLOGY	11
RESEARCH IN HIGHER EDUCATION	10
JOURNAL OF EMOTIONAL AND BEHAVIORAL DISORDERS	10
TEACHING IN HIGHER EDUCATION	10
RESEARCH POLICY	10
BEHAVIOR MODIFICATION	10
SCHOOL PSYCHOLOGY QUARTERLY	9
SCHOOL PSYCHOLOGY	9
LEARNING AND INSTRUCTION	9
CULTURAL DIVERSITY & ETHNIC MINORITY PSYCHOLOGY	9
JOURNAL OF BEHAVIORAL EDUCATION	9
ASIA-PACIFIC EDUCATION RESEARCHER	9
EXCEPTIONAL CHILDREN	9
JOURNAL OF ADOLESCENT RESEARCH	9
HELIYON	9
HIGHER EDUCATION RESEARCH & DEVELOPMENT	9
[truncated: 482 more rows]

## Sheet: Price
Publication Year (PY)	Count	Difference
[truncated: 36 more rows]

[truncated: 4 more sheets: Lotka, h-index, Bradford, CO]
